# Supplementary material for: Bridging the gap: improving correspondence between low-field and high-field magnetic resonance images in young people
Source: bioRxiv or medRxiv preprint supplement (doi:10.1101/2024.01.05.24300892), 2024-01-07

# Supplementary Content

## Supplemental Tables

**STable 1.** Scan Parameters for the 64 mT and 3T MRI scans obtained in this study

**STable 2.** Pearson correlations of regional measurements from standard versus SynthSR-processed axial 64mT scans with 3T scans

**STable 3.** Intra-class correlations of regional measurements from standard versus SynthSR-processed axial 64mT scans with 3T scans

**STable 4.** Pearson correlations of regional measurements from standard axial versus standard multi-orientation 64mT scans with 3T scans

**STable 5.** Intra-class correlations of regional measurements from standard versus SynthSR-processed axial 64mT scans with 3T scans

**STable 6.** Correlations of global measurements from SynthSR-processed axial 64mT scans versus SynthSR-processed repeated 64mT scans with 3T scans

**STable 7.** Correlations of individual-level differences between low- and high-field scans with motion during low-field scans (framewise displacement).

**STable 8.** Correlations of individual-level differences between low- and high-field scans with participant age.

## Supplemental Figures

**SFigure 1.** Flow chart of participant inclusion and exclusion

**SFigure 2.** Bland-Altman plots of individual-level global measurements from standard 64mT axial and 3T scans

**SFigure 3.** Bland-Altman plots of individual-level global measurements from SynthSR-processed 64mT axial and 3T scans

**SFigure 4.** Comparison of individual-level global measurements across standard 64mT axial scans, standard 64mT repeated multi-orientation scans, and traditional 3T scans

**SFigure 5.** Comparison of individual-level global measurements across standard 64mT axial scans, SynthSR-processed 64mT repeated multi-orientation scans, and traditional 3T scans

**SFigure 6.** Comparison of super-resolution approaches in improving correspondence between low-field and high-field-acquired MR images

**Supplemental Tables****STable 1.** Scan Parameters for the 64 mT and 3T MRI scans obtained in this study.

| Scan Type        | Scanner Manufacturer | Scanner Model | Repetition Time (s) | Echo Time (s) | Inversion Time (s) | Flip Angle (deg) | Percent Phase FOV | Slice Thickness (mm) | Slice Resolution (mm) | Total Acquisition Time (s) |
|------------------|----------------------|---------------|---------------------|---------------|--------------------|------------------|-------------------|----------------------|-----------------------|----------------------------|
| T1 64mT Axial    | Hyperfine            | Swoop         | 1.5                 | 0.00596       | 0.3                | 90               | 100.00            | 5.0                  | 1.6 x 1.6             | 339                        |
| T1 64mT Coronal  | Hyperfine            | Swoop         | 1.5                 | 0.00559       | 0.3                | 90               | 100.00            | 5.0                  | 1.6 x 1.6             | 332                        |
| T1 64mT Sagittal | Hyperfine            | Swoop         | 1.5                 | 0.00588       | 0.3                | 90               | 100.00            | 5.0                  | 1.6 x 1.6             | 339                        |
| T1 3T            | Siemens              | Prisma        | 2.5                 | 0.00207       | 1                  | 8                | 93.75             | 0.8                  | 0.8 x 0.8             | 394                        |
| T2 64mT Axial    | Hyperfine            | Swoop         | 2.0                 | 0.18240       | •                  | 90               | 100.00            | 5.0                  | 1.6 x 1.6             | 173                        |
| T2 64mT Coronal  | Hyperfine            | Swoop         | 2.0                 | 0.21760       | •                  | 90               | 65.00             | 5.0                  | 1.6 x 1.6             | 141                        |
| T2 64mT Sagittal | Hyperfine            | Swoop         | 2.0                 | 0.23000       | •                  | 90               | 65.00             | 5.0                  | 1.6 x 1.6             | 119                        |
| T2 3T            | Siemens              | Prisma        | 3.2                 | 0.56400       | •                  | 120              | 93.75             | 0.8                  | 0.8 x 0.8             | 357                        |

Note: Four participants received slightly modified T1-weighted 64mT scans (repetition time = 0.88 s, inversion time = 0.354 s). Excluding these participants from the analyses did not significantly change the results.

**STable 2.** Pearson correlations of regional measurements from standard versus SynthSR-processed axial 64mT scans with 3T scans. Differences between correlation strengths were tested using Steiger's Z. A positive Z-value indicates that SynthSR-processed regions were more strongly correlated to 3T scans than standard regions. Analyses that are statistically significant after correction for multiple comparisons are in bold.

| Measurement                                      | Standard Axial 64mT Correlations with 3T |              |              | SynthSR-Processed Axial 64mT Correlations with 3T |                 |              | Steiger     |              |              |
|--------------------------------------------------|------------------------------------------|--------------|--------------|---------------------------------------------------|-----------------|--------------|-------------|--------------|--------------|
|                                                  | <i>r</i>                                 | <i>p</i>     | <i>q</i>     | <i>r</i>                                          | <i>p</i>        | <i>q</i>     | <i>z</i>    | <i>p</i>     | <i>q</i>     |
| left banks of superior temporal sulcus thickness | <b>-0.32</b>                             | <b>0.007</b> | <b>0.015</b> | -0.07                                             | 0.589           | 0.675        | 1.81        | 0.070        | 0.113        |
| left caudal anterior cingulate thickness         | 0.01                                     | 0.914        | 0.939        | 0.25                                              | 0.037           | 0.064        | 1.59        | 0.113        | 0.170        |
| left caudal middle frontal thickness             | 0.20                                     | 0.090        | 0.140        | <b>0.35</b>                                       | <b>0.003</b>    | <b>0.007</b> | 1.08        | 0.278        | 0.367        |
| left cuneus thickness                            | 0.13                                     | 0.276        | 0.365        | 0.14                                              | 0.260           | 0.348        | 0.03        | 0.977        | 0.984        |
| left entorhinal thickness                        | -0.02                                    | 0.896        | 0.926        | 5.0e-03                                           | 0.967           | 0.977        | 0.13        | 0.898        | 0.928        |
| left fusiform thickness                          | -0.17                                    | 0.168        | 0.239        | 0.17                                              | 0.166           | 0.237        | 1.95        | 0.051        | 0.086        |
| left inferior parietal thickness                 | -0.19                                    | 0.123        | 0.183        | 0.16                                              | 0.173           | 0.245        | <b>2.70</b> | <b>0.007</b> | <b>0.014</b> |
| left inferior temporal thickness                 | 0.09                                     | 0.481        | 0.574        | 0.18                                              | 0.133           | 0.195        | 0.56        | 0.578        | 0.666        |
| left isthmus cingulate thickness                 | -0.03                                    | 0.829        | 0.878        | 0.08                                              | 0.536           | 0.628        | 0.55        | 0.580        | 0.667        |
| left lateral occipital thickness                 | 0.01                                     | 0.929        | 0.949        | 0.07                                              | 0.568           | 0.657        | 0.39        | 0.700        | 0.768        |
| left lateral orbitofrontal thickness             | -0.04                                    | 0.771        | 0.830        | 0.19                                              | 0.110           | 0.166        | 1.56        | 0.118        | 0.177        |
| left lingual thickness                           | 0.09                                     | 0.449        | 0.542        | -0.06                                             | 0.614           | 0.695        | -0.83       | 0.405        | 0.503        |
| left medial orbitofrontal thickness              | <b>-0.34</b>                             | <b>0.004</b> | <b>0.009</b> | 0.18                                              | 0.130           | 0.192        | <b>2.85</b> | <b>0.004</b> | <b>0.010</b> |
| left middle temporal thickness                   | <b>-0.27</b>                             | <b>0.022</b> | <b>0.041</b> | <b>0.30</b>                                       | <b>0.013</b>    | <b>0.025</b> | <b>3.24</b> | <b>0.001</b> | <b>0.003</b> |
| left parahippocampal thickness                   | 0.03                                     | 0.776        | 0.836        | <b>0.36</b>                                       | <b>0.002</b>    | <b>0.005</b> | 2.12        | 0.034        | 0.060        |
| left paracentral thickness                       | 0.06                                     | 0.642        | 0.720        | 0.04                                              | 0.761           | 0.821        | -0.12       | 0.903        | 0.930        |
| left pars triangularis thickness                 | <b>0.33</b>                              | <b>0.005</b> | <b>0.011</b> | <b>0.33</b>                                       | <b>0.005</b>    | <b>0.010</b> | 0.02        | 0.982        | 0.987        |
| left pars opercularis thickness                  | -0.13                                    | 0.298        | 0.389        | -0.02                                             | 0.844           | 0.888        | 0.74        | 0.460        | 0.554        |
| left pars orbitalis thickness                    | -0.21                                    | 0.081        | 0.129        | -2.9e-05                                          | 1.000           | 1.000        | 1.32        | 0.185        | 0.259        |
| left pericalcarine thickness                     | 0.09                                     | 0.447        | 0.542        | -0.20                                             | 0.089           | 0.138        | -1.90       | 0.058        | 0.095        |
| left postcentral thickness                       | 0.13                                     | 0.299        | 0.390        | 0.24                                              | 0.045           | 0.077        | 0.77        | 0.442        | 0.536        |
| left posterior cingulate thickness               | -0.18                                    | 0.133        | 0.196        | 0.24                                              | 0.045           | 0.077        | <b>2.46</b> | <b>0.014</b> | <b>0.027</b> |
| left precentral thickness                        | 0.09                                     | 0.484        | 0.577        | 0.19                                              | 0.121           | 0.180        | 0.71        | 0.479        | 0.572        |
| left precuneus thickness                         | 0.07                                     | 0.550        | 0.642        | <b>0.40</b>                                       | <b>5.74e-04</b> | <b>0.001</b> | <b>2.30</b> | <b>0.022</b> | <b>0.040</b> |
| left rostral anterior cingulate thickness        | <b>-0.30</b>                             | <b>0.010</b> | <b>0.021</b> | -0.02                                             | 0.891           | 0.921        | 2.04        | 0.042        | 0.072        |
| left rostral middle frontal thickness            | -0.01                                    | 0.915        | 0.939        | 0.09                                              | 0.467           | 0.561        | 0.81        | 0.419        | 0.515        |
| left superior frontal thickness                  | 0.02                                     | 0.843        | 0.888        | <b>0.36</b>                                       | <b>0.002</b>    | <b>0.005</b> | <b>2.78</b> | <b>0.005</b> | <b>0.012</b> |
| left superior parietal thickness                 | 0.04                                     | 0.722        | 0.787        | 0.11                                              | 0.363           | 0.461        | 0.43        | 0.670        | 0.742        |
| left superior temporal thickness                 | -0.24                                    | 0.049        | 0.082        | <b>0.31</b>                                       | <b>0.009</b>    | <b>0.019</b> | <b>3.10</b> | <b>0.002</b> | <b>0.005</b> |

|                                                   |              |              |              |              |                 |                 |             |                 |                 |
|---------------------------------------------------|--------------|--------------|--------------|--------------|-----------------|-----------------|-------------|-----------------|-----------------|
| left supramarginal thickness                      | 0.02         | 0.859        | 0.898        | <b>0.41</b>  | <b>4.39e-04</b> | <b>0.001</b>    | <b>2.44</b> | <b>0.015</b>    | <b>0.028</b>    |
| left frontal pole thickness                       | -0.23        | 0.058        | 0.095        | <b>-0.35</b> | <b>0.003</b>    | <b>0.007</b>    | -0.75       | 0.453           | 0.547           |
| left temporal pole thickness                      | -0.24        | 0.048        | 0.081        | 0.14         | 0.257           | 0.345           | 2.18        | 0.029           | 0.052           |
| left transverse temporal thickness                | <b>-0.30</b> | <b>0.012</b> | <b>0.023</b> | <b>0.27</b>  | <b>0.024</b>    | <b>0.043</b>    | <b>3.46</b> | <b>5.49e-04</b> | <b>0.001</b>    |
| left insula thickness                             | -0.07        | 0.539        | 0.631        | -0.10        | 0.406           | 0.503           | -0.18       | 0.861           | 0.899           |
| right banks of superior temporal sulcus thickness | -0.13        | 0.290        | 0.381        | 0.10         | 0.392           | 0.491           | 1.71        | 0.087           | 0.136           |
| right caudal anterior cingulate thickness         | -0.16        | 0.174        | 0.247        | 0.01         | 0.931           | 0.949           | 0.97        | 0.333           | 0.427           |
| right caudal middle frontal thickness             | 0.05         | 0.656        | 0.732        | <b>0.29</b>  | <b>0.015</b>    | <b>0.029</b>    | 1.46        | 0.145           | 0.210           |
| right cuneus thickness                            | 0.10         | 0.428        | 0.523        | 0.14         | 0.231           | 0.315           | 0.28        | 0.780           | 0.839           |
| right entorhinal thickness                        | -0.23        | 0.057        | 0.094        | -0.05        | 0.661           | 0.736           | 1.01        | 0.313           | 0.405           |
| right fusiform thickness                          | -0.21        | 0.088        | 0.137        | <b>-0.35</b> | <b>0.003</b>    | <b>0.007</b>    | -0.93       | 0.350           | 0.447           |
| right inferior parietal thickness                 | -0.21        | 0.077        | 0.123        | 0.06         | 0.649           | 0.725           | 2.02        | 0.043           | 0.074           |
| right inferior temporal thickness                 | -0.14        | 0.256        | 0.344        | -2.7e-03     | 0.982           | 0.987           | 0.88        | 0.376           | 0.475           |
| right isthmus cingulate thickness                 | -0.02        | 0.871        | 0.907        | 0.06         | 0.608           | 0.690           | 0.49        | 0.626           | 0.706           |
| right lateral occipital thickness                 | 0.18         | 0.128        | 0.189        | 0.06         | 0.632           | 0.712           | -1.02       | 0.309           | 0.400           |
| right lateral orbitofrontal thickness             | -0.05        | 0.710        | 0.776        | 0.09         | 0.474           | 0.568           | 0.77        | 0.441           | 0.536           |
| right lingual thickness                           | -0.04        | 0.756        | 0.817        | 0.06         | 0.630           | 0.710           | 0.56        | 0.574           | 0.662           |
| right medial orbitofrontal thickness              | <b>-0.35</b> | <b>0.003</b> | <b>0.006</b> | -0.05        | 0.686           | 0.756           | 2.07        | 0.039           | 0.068           |
| right middle temporal thickness                   | <b>-0.37</b> | <b>0.002</b> | <b>0.004</b> | 0.17         | 0.164           | 0.234           | <b>3.37</b> | <b>7.46e-04</b> | <b>0.002</b>    |
| right parahippocampal thickness                   | 0.21         | 0.077        | 0.122        | <b>0.40</b>  | <b>6.56e-04</b> | <b>0.002</b>    | 1.13        | 0.259           | 0.347           |
| right paracentral thickness                       | 0.17         | 0.171        | 0.243        | 0.09         | 0.459           | 0.553           | -0.51       | 0.608           | 0.690           |
| right pars triangularis thickness                 | 0.21         | 0.087        | 0.136        | 0.20         | 0.105           | 0.159           | -0.08       | 0.938           | 0.955           |
| right pars opercularis thickness                  | -0.05        | 0.683        | 0.754        | <b>0.28</b>  | <b>0.021</b>    | <b>0.039</b>    | 2.01        | 0.045           | 0.076           |
| right pars orbitalis thickness                    | 3.2e-03      | 0.979        | 0.986        | 0.25         | 0.036           | 0.063           | 1.83        | 0.067           | 0.108           |
| right pericalcarine thickness                     | -0.03        | 0.808        | 0.861        | -7.4e-03     | 0.951           | 0.965           | 0.15        | 0.883           | 0.916           |
| right postcentral thickness                       | 0.15         | 0.229        | 0.313        | <b>0.27</b>  | <b>0.026</b>    | <b>0.047</b>    | 0.90        | 0.366           | 0.463           |
| right posterior cingulate thickness               | -0.11        | 0.362        | 0.460        | 0.24         | 0.043           | 0.074           | <b>2.39</b> | <b>0.017</b>    | <b>0.032</b>    |
| right precentral thickness                        | 0.16         | 0.187        | 0.261        | -0.06        | 0.619           | 0.699           | -1.71       | 0.087           | 0.136           |
| right precuneus thickness                         | 0.07         | 0.539        | 0.631        | 0.20         | 0.093           | 0.143           | 0.91        | 0.361           | 0.459           |
| right rostral anterior cingulate thickness        | <b>-0.37</b> | <b>0.001</b> | <b>0.003</b> | -0.13        | 0.278           | 0.367           | 1.60        | 0.111           | 0.167           |
| right rostral middle frontal thickness            | -0.19        | 0.113        | 0.170        | 0.03         | 0.825           | 0.874           | 1.46        | 0.145           | 0.211           |
| right superior frontal thickness                  | 0.16         | 0.193        | 0.268        | 0.11         | 0.374           | 0.473           | -0.36       | 0.722           | 0.787           |
| right superior parietal thickness                 | 0.12         | 0.314        | 0.405        | 0.08         | 0.525           | 0.618           | -0.34       | 0.735           | 0.800           |
| right superior temporal thickness                 | -0.18        | 0.144        | 0.209        | <b>0.43</b>  | <b>2.45e-04</b> | <b>6.69e-04</b> | <b>4.08</b> | <b>4.42e-05</b> | <b>1.35e-04</b> |
| right supramarginal thickness                     | 0.19         | 0.106        | 0.161        | <b>0.39</b>  | <b>7.92e-04</b> | <b>0.002</b>    | 1.58        | 0.114           | 0.172           |

|                                             |             |                 |                 |             |                 |                 |             |                 |                 |
|---------------------------------------------|-------------|-----------------|-----------------|-------------|-----------------|-----------------|-------------|-----------------|-----------------|
| right frontal pole thickness                | -0.10       | 0.406           | 0.503           | -0.14       | 0.263           | 0.351           | -0.21       | 0.836           | 0.882           |
| right temporal pole thickness               | 0.17        | 0.168           | 0.239           | 0.22        | 0.062           | 0.102           | 0.37        | 0.711           | 0.776           |
| right transverse temporal thickness         | -0.03       | 0.814           | 0.866           | 0.06        | 0.594           | 0.679           | 0.59        | 0.554           | 0.646           |
| right insula thickness                      | -0.07       | 0.589           | 0.674           | 0.17        | 0.170           | 0.241           | 1.35        | 0.178           | 0.251           |
| left banks of superior temporal sulcus area | <b>0.34</b> | <b>0.003</b>    | <b>0.008</b>    | <b>0.73</b> | <b>7.58e-13</b> | <b>6.82e-12</b> | <b>3.95</b> | <b>7.77e-05</b> | <b>2.28e-04</b> |
| left caudal anterior cingulate area         | <b>0.35</b> | <b>0.003</b>    | <b>0.007</b>    | <b>0.48</b> | <b>2.46e-05</b> | <b>7.81e-05</b> | 1.62        | 0.106           | 0.161           |
| left caudal middle frontal area             | <b>0.31</b> | <b>0.009</b>    | <b>0.018</b>    | <b>0.73</b> | <b>5.25e-13</b> | <b>4.80e-12</b> | <b>4.12</b> | <b>3.78e-05</b> | <b>1.17e-04</b> |
| left cuneus area                            | <b>0.41</b> | <b>4.66e-04</b> | <b>0.001</b>    | <b>0.64</b> | <b>1.98e-09</b> | <b>1.14e-08</b> | 1.96        | 0.050           | 0.084           |
| left entorhinal area                        | -0.06       | 0.607           | 0.690           | <b>0.41</b> | <b>4.01e-04</b> | <b>0.001</b>    | <b>2.69</b> | <b>0.007</b>    | <b>0.015</b>    |
| left fusiform area                          | <b>0.31</b> | <b>0.009</b>    | <b>0.018</b>    | <b>0.65</b> | <b>1.61e-09</b> | <b>9.45e-09</b> | <b>2.54</b> | <b>0.011</b>    | <b>0.022</b>    |
| left inferior parietal area                 | <b>0.59</b> | <b>1.04e-07</b> | <b>4.85e-07</b> | <b>0.84</b> | <b>1.27e-19</b> | <b>3.75e-18</b> | <b>3.63</b> | <b>2.79e-04</b> | <b>7.52e-04</b> |
| left inferior temporal area                 | <b>0.43</b> | <b>1.98e-04</b> | <b>5.47e-04</b> | <b>0.74</b> | <b>2.58e-13</b> | <b>2.48e-12</b> | <b>3.07</b> | <b>0.002</b>    | <b>0.005</b>    |
| left isthmus cingulate area                 | <b>0.34</b> | <b>0.004</b>    | <b>0.009</b>    | <b>0.51</b> | <b>5.65e-06</b> | <b>2.02e-05</b> | 1.28        | 0.202           | 0.279           |
| left lateral occipital area                 | <b>0.33</b> | <b>0.005</b>    | <b>0.011</b>    | <b>0.52</b> | <b>4.68e-06</b> | <b>1.70e-05</b> | 1.38        | 0.167           | 0.237           |
| left lateral orbitofrontal area             | <b>0.51</b> | <b>6.58e-06</b> | <b>2.33e-05</b> | <b>0.67</b> | <b>1.51e-10</b> | <b>1.01e-09</b> | 1.82        | 0.068           | 0.111           |
| left lingual area                           | 0.24        | 0.046           | 0.078           | <b>0.59</b> | <b>9.68e-08</b> | <b>4.53e-07</b> | <b>2.52</b> | <b>0.012</b>    | <b>0.023</b>    |
| left medial orbitofrontal area              | <b>0.49</b> | <b>1.68e-05</b> | <b>5.53e-05</b> | <b>0.51</b> | <b>6.85e-06</b> | <b>2.41e-05</b> | 0.19        | 0.853           | 0.895           |
| left middle temporal area                   | <b>0.46</b> | <b>6.52e-05</b> | <b>1.93e-04</b> | <b>0.75</b> | <b>1.03e-13</b> | <b>1.04e-12</b> | <b>3.09</b> | <b>0.002</b>    | <b>0.005</b>    |
| left parahippocampal area                   | -0.23       | 0.060           | 0.098           | 0.24        | 0.048           | 0.081           | <b>2.59</b> | <b>0.009</b>    | <b>0.019</b>    |
| left paracentral area                       | <b>0.34</b> | <b>0.003</b>    | <b>0.008</b>    | <b>0.76</b> | <b>1.59e-14</b> | <b>1.77e-13</b> | <b>3.95</b> | <b>7.94e-05</b> | <b>2.32e-04</b> |
| left pars triangularis area                 | <b>0.40</b> | <b>6.91e-04</b> | <b>0.002</b>    | <b>0.65</b> | <b>1.11e-09</b> | <b>6.68e-09</b> | <b>2.55</b> | <b>0.011</b>    | <b>0.022</b>    |
| left pars opercularis area                  | <b>0.45</b> | <b>8.10e-05</b> | <b>2.37e-04</b> | <b>0.49</b> | <b>1.66e-05</b> | <b>5.46e-05</b> | 0.31        | 0.760           | 0.820           |
| left pars orbitalis area                    | <b>0.60</b> | <b>4.50e-08</b> | <b>2.22e-07</b> | <b>0.63</b> | <b>4.27e-09</b> | <b>2.37e-08</b> | 0.38        | 0.704           | 0.771           |
| left pericalcarine area                     | <b>0.33</b> | <b>0.005</b>    | <b>0.011</b>    | <b>0.65</b> | <b>1.12e-09</b> | <b>6.73e-09</b> | <b>2.81</b> | <b>0.005</b>    | <b>0.011</b>    |
| left postcentral area                       | 0.21        | 0.088           | 0.137           | <b>0.70</b> | <b>1.57e-11</b> | <b>1.19e-10</b> | <b>4.25</b> | <b>2.12e-05</b> | <b>6.80e-05</b> |
| left posterior cingulate area               | <b>0.30</b> | <b>0.011</b>    | <b>0.022</b>    | <b>0.57</b> | <b>2.02e-07</b> | <b>9.01e-07</b> | <b>2.45</b> | <b>0.014</b>    | <b>0.027</b>    |
| left precentral area                        | <b>0.36</b> | <b>0.002</b>    | <b>0.006</b>    | <b>0.83</b> | <b>3.20e-19</b> | <b>8.40e-18</b> | <b>5.70</b> | <b>1.22e-08</b> | <b>6.43e-08</b> |
| left precuneus area                         | <b>0.32</b> | <b>0.007</b>    | <b>0.015</b>    | <b>0.72</b> | <b>1.47e-12</b> | <b>1.29e-11</b> | <b>3.55</b> | <b>3.88e-04</b> | <b>0.001</b>    |
| left rostral anterior cingulate area        | <b>0.44</b> | <b>1.35e-04</b> | <b>3.84e-04</b> | <b>0.60</b> | <b>2.96e-08</b> | <b>1.48e-07</b> | 1.97        | 0.048           | 0.082           |
| left rostral middle frontal area            | <b>0.61</b> | <b>2.61e-08</b> | <b>1.31e-07</b> | <b>0.73</b> | <b>5.50e-13</b> | <b>4.99e-12</b> | 2.09        | 0.037           | 0.064           |
| left superior frontal area                  | <b>0.53</b> | <b>1.85e-06</b> | <b>7.08e-06</b> | <b>0.77</b> | <b>3.45e-15</b> | <b>4.30e-14</b> | <b>3.46</b> | <b>5.38e-04</b> | <b>0.001</b>    |
| left superior parietal area                 | <b>0.37</b> | <b>0.002</b>    | <b>0.004</b>    | <b>0.67</b> | <b>2.72e-10</b> | <b>1.77e-09</b> | <b>2.60</b> | <b>0.009</b>    | <b>0.019</b>    |
| left superior temporal area                 | <b>0.29</b> | <b>0.015</b>    | <b>0.029</b>    | <b>0.79</b> | <b>3.02e-16</b> | <b>4.64e-15</b> | <b>5.45</b> | <b>5.08e-08</b> | <b>2.47e-07</b> |
| left supramarginal area                     | <b>0.52</b> | <b>3.70e-06</b> | <b>1.36e-05</b> | <b>0.78</b> | <b>1.67e-15</b> | <b>2.27e-14</b> | <b>3.16</b> | <b>0.002</b>    | <b>0.004</b>    |

|                                              |             |                 |                 |             |                 |                 |             |                 |                 |
|----------------------------------------------|-------------|-----------------|-----------------|-------------|-----------------|-----------------|-------------|-----------------|-----------------|
| left frontal pole area                       | 0.25        | 0.038           | 0.066           | <b>0.27</b> | <b>0.023</b>    | <b>0.043</b>    | 0.14        | 0.886           | 0.918           |
| left temporal pole area                      | -0.10       | 0.428           | 0.523           | 0.14        | 0.253           | 0.341           | 1.34        | 0.179           | 0.252           |
| left transverse temporal area                | 0.16        | 0.192           | 0.267           | <b>0.73</b> | <b>4.45e-13</b> | <b>4.13e-12</b> | <b>4.64</b> | <b>3.56e-06</b> | <b>1.31e-05</b> |
| left insula area                             | <b>0.28</b> | <b>0.018</b>    | <b>0.033</b>    | <b>0.77</b> | <b>8.40e-15</b> | <b>9.89e-14</b> | <b>4.57</b> | <b>4.94e-06</b> | <b>1.78e-05</b> |
| right banks of superior temporal sulcus area | <b>0.41</b> | <b>3.90e-04</b> | <b>0.001</b>    | <b>0.69</b> | <b>5.38e-11</b> | <b>3.70e-10</b> | <b>2.60</b> | <b>0.009</b>    | <b>0.019</b>    |
| right caudal anterior cingulate area         | <b>0.62</b> | <b>9.78e-09</b> | <b>5.24e-08</b> | <b>0.71</b> | <b>6.36e-12</b> | <b>5.04e-11</b> | 1.32        | 0.186           | 0.260           |
| right caudal middle frontal area             | <b>0.44</b> | <b>1.14e-04</b> | <b>3.28e-04</b> | <b>0.60</b> | <b>4.47e-08</b> | <b>2.21e-07</b> | 1.59        | 0.112           | 0.169           |
| right cuneus area                            | 0.18        | 0.141           | 0.206           | <b>0.51</b> | <b>5.56e-06</b> | <b>1.99e-05</b> | <b>2.81</b> | <b>0.005</b>    | <b>0.011</b>    |
| right entorhinal area                        | -0.16       | 0.183           | 0.257           | 0.15        | 0.210           | 0.288           | 1.98        | 0.048           | 0.081           |
| right fusiform area                          | <b>0.44</b> | <b>1.17e-04</b> | <b>3.36e-04</b> | <b>0.77</b> | <b>3.84e-15</b> | <b>4.76e-14</b> | <b>3.48</b> | <b>4.96e-04</b> | <b>0.001</b>    |
| right inferior parietal area                 | <b>0.53</b> | <b>2.26e-06</b> | <b>8.58e-06</b> | <b>0.74</b> | <b>3.22e-13</b> | <b>3.06e-12</b> | <b>2.57</b> | <b>0.010</b>    | <b>0.020</b>    |
| right inferior temporal area                 | <b>0.55</b> | <b>8.35e-07</b> | <b>3.39e-06</b> | <b>0.77</b> | <b>5.89e-15</b> | <b>7.05e-14</b> | <b>2.76</b> | <b>0.006</b>    | <b>0.012</b>    |
| right isthmus cingulate area                 | 0.19        | 0.122           | 0.181           | <b>0.72</b> | <b>1.59e-12</b> | <b>1.38e-11</b> | <b>4.74</b> | <b>2.09e-06</b> | <b>7.97e-06</b> |
| right lateral occipital area                 | <b>0.54</b> | <b>1.44e-06</b> | <b>5.62e-06</b> | <b>0.65</b> | <b>1.26e-09</b> | <b>7.49e-09</b> | 1.13        | 0.257           | 0.344           |
| right lateral orbitofrontal area             | <b>0.51</b> | <b>7.31e-06</b> | <b>2.56e-05</b> | <b>0.54</b> | <b>1.19e-06</b> | <b>4.72e-06</b> | 0.35        | 0.725           | 0.790           |
| right lingual area                           | 0.10        | 0.409           | 0.505           | <b>0.60</b> | <b>5.27e-08</b> | <b>2.56e-07</b> | <b>4.33</b> | <b>1.46e-05</b> | <b>4.86e-05</b> |
| right medial orbitofrontal area              | <b>0.43</b> | <b>2.03e-04</b> | <b>5.58e-04</b> | <b>0.45</b> | <b>8.81e-05</b> | <b>2.57e-04</b> | 0.17        | 0.868           | 0.904           |
| right middle temporal area                   | <b>0.45</b> | <b>9.29e-05</b> | <b>2.69e-04</b> | <b>0.76</b> | <b>3.22e-14</b> | <b>3.45e-13</b> | <b>3.59</b> | <b>3.34e-04</b> | <b>8.93e-04</b> |
| right parahippocampal area                   | 0.03        | 0.814           | 0.866           | <b>0.28</b> | <b>0.018</b>    | <b>0.035</b>    | 1.53        | 0.126           | 0.187           |
| right paracentral area                       | <b>0.36</b> | <b>0.002</b>    | <b>0.005</b>    | <b>0.62</b> | <b>1.45e-08</b> | <b>7.60e-08</b> | <b>2.44</b> | <b>0.015</b>    | <b>0.028</b>    |
| right pars triangularis area                 | <b>0.42</b> | <b>3.09e-04</b> | <b>8.29e-04</b> | <b>0.75</b> | <b>6.47e-14</b> | <b>6.74e-13</b> | <b>3.97</b> | <b>7.26e-05</b> | <b>2.14e-04</b> |
| right pars opercularis area                  | <b>0.48</b> | <b>2.23e-05</b> | <b>7.13e-05</b> | <b>0.55</b> | <b>1.03e-06</b> | <b>4.11e-06</b> | 0.58        | 0.561           | 0.651           |
| right pars orbitalis area                    | <b>0.37</b> | <b>0.001</b>    | <b>0.003</b>    | <b>0.64</b> | <b>2.70e-09</b> | <b>1.52e-08</b> | <b>2.75</b> | <b>0.006</b>    | <b>0.013</b>    |
| right pericalcarine area                     | <b>0.44</b> | <b>1.53e-04</b> | <b>4.31e-04</b> | <b>0.68</b> | <b>8.42e-11</b> | <b>5.69e-10</b> | <b>2.63</b> | <b>0.009</b>    | <b>0.017</b>    |
| right postcentral area                       | <b>0.44</b> | <b>1.27e-04</b> | <b>3.64e-04</b> | <b>0.69</b> | <b>3.44e-11</b> | <b>2.43e-10</b> | <b>2.84</b> | <b>0.004</b>    | <b>0.010</b>    |
| right posterior cingulate area               | <b>0.32</b> | <b>0.007</b>    | <b>0.014</b>    | <b>0.70</b> | <b>2.11e-11</b> | <b>1.57e-10</b> | <b>4.18</b> | <b>2.88e-05</b> | <b>9.02e-05</b> |
| right precentral area                        | <b>0.48</b> | <b>2.62e-05</b> | <b>8.27e-05</b> | <b>0.63</b> | <b>6.76e-09</b> | <b>3.69e-08</b> | 1.51        | 0.132           | 0.193           |
| right precuneus area                         | <b>0.43</b> | <b>1.77e-04</b> | <b>4.92e-04</b> | <b>0.70</b> | <b>1.61e-11</b> | <b>1.21e-10</b> | <b>2.58</b> | <b>0.010</b>    | <b>0.020</b>    |
| right rostral anterior cingulate area        | <b>0.57</b> | <b>2.66e-07</b> | <b>1.17e-06</b> | <b>0.78</b> | <b>1.14e-15</b> | <b>1.57e-14</b> | <b>3.20</b> | <b>0.001</b>    | <b>0.003</b>    |
| right rostral middle frontal area            | <b>0.49</b> | <b>1.97e-05</b> | <b>6.38e-05</b> | <b>0.64</b> | <b>1.86e-09</b> | <b>1.07e-08</b> | 1.78        | 0.075           | 0.120           |
| right superior frontal area                  | <b>0.56</b> | <b>4.54e-07</b> | <b>1.92e-06</b> | <b>0.69</b> | <b>3.90e-11</b> | <b>2.74e-10</b> | 1.82        | 0.069           | 0.111           |
| right superior parietal area                 | 0.22        | 0.062           | 0.102           | <b>0.61</b> | <b>1.72e-08</b> | <b>8.90e-08</b> | <b>3.21</b> | <b>0.001</b>    | <b>0.003</b>    |
| right superior temporal area                 | <b>0.50</b> | <b>8.61e-06</b> | <b>2.98e-05</b> | <b>0.79</b> | <b>2.42e-16</b> | <b>3.83e-15</b> | <b>3.72</b> | <b>1.99e-04</b> | <b>5.48e-04</b> |
| right supramarginal area                     | <b>0.28</b> | <b>0.021</b>    | <b>0.039</b>    | <b>0.66</b> | <b>5.42e-10</b> | <b>3.39e-09</b> | <b>3.66</b> | <b>2.49e-04</b> | <b>6.80e-04</b> |
| right frontal pole area                      | <b>0.26</b> | <b>0.027</b>    | <b>0.049</b>    | 0.14        | 0.252           | 0.340           | -0.85       | 0.396           | 0.495           |

|                                               |             |                 |                 |             |                 |                 |             |                 |                 |
|-----------------------------------------------|-------------|-----------------|-----------------|-------------|-----------------|-----------------|-------------|-----------------|-----------------|
| right temporal pole area                      | 7.4e-03     | 0.951           | 0.965           | 0.07        | 0.578           | 0.666           | 0.36        | 0.717           | 0.783           |
| right transverse temporal area                | 0.26        | 0.032           | 0.057           | <b>0.59</b> | <b>6.46e-08</b> | <b>3.08e-07</b> | <b>2.71</b> | <b>0.007</b>    | <b>0.014</b>    |
| right insula area                             | 0.22        | 0.066           | 0.107           | <b>0.67</b> | <b>2.15e-10</b> | <b>1.41e-09</b> | <b>3.55</b> | <b>3.84e-04</b> | <b>0.001</b>    |
| left banks of superior temporal sulcus volume | 0.26        | 0.033           | 0.059           | <b>0.67</b> | <b>2.73e-10</b> | <b>1.77e-09</b> | <b>4.31</b> | <b>1.60e-05</b> | <b>5.28e-05</b> |
| left caudal anterior cingulate volume         | <b>0.30</b> | <b>0.011</b>    | <b>0.021</b>    | <b>0.58</b> | <b>1.43e-07</b> | <b>6.51e-07</b> | <b>3.48</b> | <b>5.03e-04</b> | <b>0.001</b>    |
| left caudal middle frontal volume             | <b>0.40</b> | <b>6.72e-04</b> | <b>0.002</b>    | <b>0.73</b> | <b>1.24e-12</b> | <b>1.08e-11</b> | <b>3.29</b> | <b>9.99e-04</b> | <b>0.002</b>    |
| left cuneus volume                            | <b>0.31</b> | <b>0.010</b>    | <b>0.020</b>    | <b>0.66</b> | <b>6.62e-10</b> | <b>4.10e-09</b> | <b>2.90</b> | <b>0.004</b>    | <b>0.008</b>    |
| left entorhinal volume                        | -0.10       | 0.405           | 0.503           | <b>0.39</b> | <b>9.33e-04</b> | <b>0.002</b>    | <b>2.74</b> | <b>0.006</b>    | <b>0.013</b>    |
| left fusiform volume                          | <b>0.31</b> | <b>0.009</b>    | <b>0.018</b>    | <b>0.66</b> | <b>5.61e-10</b> | <b>3.50e-09</b> | <b>2.71</b> | <b>0.007</b>    | <b>0.014</b>    |
| left inferior parietal volume                 | <b>0.57</b> | <b>3.03e-07</b> | <b>1.31e-06</b> | <b>0.85</b> | <b>7.18e-21</b> | <b>2.95e-19</b> | <b>4.18</b> | <b>2.89e-05</b> | <b>9.05e-05</b> |
| left inferior temporal volume                 | <b>0.46</b> | <b>6.67e-05</b> | <b>1.97e-04</b> | <b>0.78</b> | <b>2.76e-15</b> | <b>3.49e-14</b> | <b>3.50</b> | <b>4.70e-04</b> | <b>0.001</b>    |
| left isthmus cingulate volume                 | <b>0.31</b> | <b>0.010</b>    | <b>0.020</b>    | <b>0.52</b> | <b>4.48e-06</b> | <b>1.64e-05</b> | 1.52        | 0.130           | 0.191           |
| left lateral occipital volume                 | <b>0.39</b> | <b>7.49e-04</b> | <b>0.002</b>    | <b>0.55</b> | <b>9.78e-07</b> | <b>3.94e-06</b> | 1.31        | 0.189           | 0.263           |
| left lateral orbitofrontal volume             | <b>0.48</b> | <b>2.98e-05</b> | <b>9.31e-05</b> | <b>0.69</b> | <b>5.83e-11</b> | <b>3.96e-10</b> | 2.18        | 0.029           | 0.052           |
| left lingual volume                           | 0.12        | 0.312           | 0.403           | <b>0.65</b> | <b>8.48e-10</b> | <b>5.14e-09</b> | <b>4.19</b> | <b>2.84e-05</b> | <b>8.93e-05</b> |
| left medial orbitofrontal volume              | <b>0.30</b> | <b>0.012</b>    | <b>0.024</b>    | <b>0.41</b> | <b>3.75e-04</b> | <b>9.91e-04</b> | 0.94        | 0.348           | 0.445           |
| left middle temporal volume                   | <b>0.31</b> | <b>0.010</b>    | <b>0.020</b>    | <b>0.71</b> | <b>6.56e-12</b> | <b>5.18e-11</b> | <b>3.73</b> | <b>1.92e-04</b> | <b>5.31e-04</b> |
| left parahippocampal volume                   | -0.04       | 0.721           | 0.787           | 0.19        | 0.109           | 0.165           | 1.40        | 0.163           | 0.233           |
| left paracentral volume                       | <b>0.32</b> | <b>0.006</b>    | <b>0.013</b>    | <b>0.65</b> | <b>1.22e-09</b> | <b>7.26e-09</b> | <b>2.75</b> | <b>0.006</b>    | <b>0.013</b>    |
| left pars triangularis volume                 | <b>0.47</b> | <b>4.51e-05</b> | <b>1.37e-04</b> | <b>0.65</b> | <b>8.33e-10</b> | <b>5.07e-09</b> | <b>2.26</b> | <b>0.024</b>    | <b>0.044</b>    |
| left pars opercularis volume                  | <b>0.35</b> | <b>0.003</b>    | <b>0.006</b>    | <b>0.43</b> | <b>1.92e-04</b> | <b>5.31e-04</b> | 0.63        | 0.528           | 0.620           |
| left pars orbitalis volume                    | <b>0.54</b> | <b>1.27e-06</b> | <b>4.99e-06</b> | <b>0.58</b> | <b>1.13e-07</b> | <b>5.22e-07</b> | 0.42        | 0.673           | 0.744           |
| left pericalcarine volume                     | <b>0.32</b> | <b>0.007</b>    | <b>0.014</b>    | <b>0.56</b> | <b>3.72e-07</b> | <b>1.60e-06</b> | 2.04        | 0.041           | 0.071           |
| left postcentral volume                       | 0.23        | 0.053           | 0.088           | <b>0.68</b> | <b>7.81e-11</b> | <b>5.30e-10</b> | <b>3.79</b> | <b>1.50e-04</b> | <b>4.24e-04</b> |
| left posterior cingulate volume               | <b>0.27</b> | <b>0.023</b>    | <b>0.042</b>    | <b>0.55</b> | <b>7.17e-07</b> | <b>2.94e-06</b> | <b>2.49</b> | <b>0.013</b>    | <b>0.025</b>    |
| left precentral volume                        | <b>0.36</b> | <b>0.002</b>    | <b>0.006</b>    | <b>0.79</b> | <b>3.11e-16</b> | <b>4.74e-15</b> | <b>5.42</b> | <b>6.11e-08</b> | <b>2.93e-07</b> |
| left precuneus volume                         | <b>0.29</b> | <b>0.015</b>    | <b>0.029</b>    | <b>0.75</b> | <b>6.46e-14</b> | <b>6.74e-13</b> | <b>4.29</b> | <b>1.76e-05</b> | <b>5.76e-05</b> |
| left rostral anterior cingulate volume        | <b>0.39</b> | <b>8.49e-04</b> | <b>0.002</b>    | <b>0.52</b> | <b>4.98e-06</b> | <b>1.79e-05</b> | 1.31        | 0.189           | 0.263           |
| left rostral middle frontal volume            | <b>0.51</b> | <b>7.43e-06</b> | <b>2.59e-05</b> | <b>0.60</b> | <b>5.01e-08</b> | <b>2.45e-07</b> | 1.08        | 0.280           | 0.370           |
| left superior frontal volume                  | <b>0.38</b> | <b>0.001</b>    | <b>0.003</b>    | <b>0.70</b> | <b>1.22e-11</b> | <b>9.42e-11</b> | <b>4.15</b> | <b>3.36e-05</b> | <b>1.04e-04</b> |
| left superior parietal volume                 | <b>0.47</b> | <b>4.29e-05</b> | <b>1.31e-04</b> | <b>0.64</b> | <b>1.76e-09</b> | <b>1.03e-08</b> | 1.57        | 0.117           | 0.174           |
| left superior temporal volume                 | 0.21        | 0.087           | 0.136           | <b>0.80</b> | <b>1.05e-16</b> | <b>1.74e-15</b> | <b>6.18</b> | <b>6.46e-10</b> | <b>4.01e-09</b> |
| left supramarginal volume                     | <b>0.42</b> | <b>2.70e-04</b> | <b>7.31e-04</b> | <b>0.75</b> | <b>4.94e-14</b> | <b>5.22e-13</b> | <b>3.66</b> | <b>2.51e-04</b> | <b>6.85e-04</b> |
| left frontal pole volume                      | -0.04       | 0.754           | 0.816           | -0.11       | 0.371           | 0.469           | -0.48       | 0.632           | 0.712           |

|                                                |             |                 |                 |             |                 |                 |             |                 |                 |
|------------------------------------------------|-------------|-----------------|-----------------|-------------|-----------------|-----------------|-------------|-----------------|-----------------|
| left temporal pole volume                      | -0.08       | 0.495           | 0.589           | 0.08        | 0.528           | 0.620           | 0.85        | 0.394           | 0.492           |
| left transverse temporal volume                | 0.11        | 0.380           | 0.479           | <b>0.68</b> | <b>8.82e-11</b> | <b>5.95e-10</b> | <b>4.39</b> | <b>1.14e-05</b> | <b>3.89e-05</b> |
| left insula volume                             | <b>0.42</b> | <b>2.65e-04</b> | <b>7.20e-04</b> | <b>0.73</b> | <b>4.72e-13</b> | <b>4.35e-12</b> | <b>3.31</b> | <b>9.48e-04</b> | <b>0.002</b>    |
| right banks of superior temporal sulcus volume | <b>0.43</b> | <b>1.89e-04</b> | <b>5.23e-04</b> | <b>0.61</b> | <b>1.84e-08</b> | <b>9.50e-08</b> | 1.64        | 0.101           | 0.155           |
| right caudal anterior cingulate volume         | <b>0.64</b> | <b>2.45e-09</b> | <b>1.39e-08</b> | <b>0.74</b> | <b>4.18e-13</b> | <b>3.89e-12</b> | 1.39        | 0.166           | 0.237           |
| right caudal middle frontal volume             | <b>0.47</b> | <b>4.19e-05</b> | <b>1.28e-04</b> | <b>0.58</b> | <b>1.40e-07</b> | <b>6.37e-07</b> | 1.11        | 0.268           | 0.356           |
| right cuneus volume                            | 0.16        | 0.179           | 0.252           | <b>0.51</b> | <b>7.31e-06</b> | <b>2.56e-05</b> | <b>2.80</b> | <b>0.005</b>    | <b>0.011</b>    |
| right entorhinal volume                        | -0.24       | 0.042           | 0.072           | 0.22        | 0.067           | 0.108           | <b>2.88</b> | <b>0.004</b>    | <b>0.009</b>    |
| right fusiform volume                          | <b>0.32</b> | <b>0.007</b>    | <b>0.014</b>    | <b>0.72</b> | <b>1.56e-12</b> | <b>1.36e-11</b> | <b>3.63</b> | <b>2.88e-04</b> | <b>7.76e-04</b> |
| right inferior parietal volume                 | <b>0.48</b> | <b>2.84e-05</b> | <b>8.93e-05</b> | <b>0.73</b> | <b>8.85e-13</b> | <b>7.87e-12</b> | <b>3.20</b> | <b>0.001</b>    | <b>0.003</b>    |
| right inferior temporal volume                 | <b>0.53</b> | <b>2.75e-06</b> | <b>1.03e-05</b> | <b>0.76</b> | <b>1.43e-14</b> | <b>1.62e-13</b> | <b>2.86</b> | <b>0.004</b>    | <b>0.009</b>    |
| right isthmus cingulate volume                 | 0.19        | 0.112           | 0.169           | <b>0.69</b> | <b>3.15e-11</b> | <b>2.24e-10</b> | <b>4.42</b> | <b>9.72e-06</b> | <b>3.34e-05</b> |
| right lateral occipital volume                 | <b>0.57</b> | <b>3.13e-07</b> | <b>1.36e-06</b> | <b>0.62</b> | <b>1.03e-08</b> | <b>5.46e-08</b> | 0.61        | 0.542           | 0.634           |
| right lateral orbitofrontal volume             | <b>0.49</b> | <b>1.86e-05</b> | <b>6.06e-05</b> | <b>0.60</b> | <b>4.26e-08</b> | <b>2.11e-07</b> | 1.13        | 0.257           | 0.344           |
| right lingual volume                           | 0.04        | 0.753           | 0.815           | <b>0.64</b> | <b>1.78e-09</b> | <b>1.04e-08</b> | <b>5.43</b> | <b>5.61e-08</b> | <b>2.70e-07</b> |
| right medial orbitofrontal volume              | <b>0.28</b> | <b>0.020</b>    | <b>0.038</b>    | <b>0.32</b> | <b>0.008</b>    | <b>0.016</b>    | 0.29        | 0.774           | 0.834           |
| right middle temporal volume                   | <b>0.38</b> | <b>0.001</b>    | <b>0.003</b>    | <b>0.69</b> | <b>3.21e-11</b> | <b>2.28e-10</b> | <b>3.28</b> | <b>0.001</b>    | <b>0.003</b>    |
| right parahippocampal volume                   | 0.12        | 0.309           | 0.400           | 0.03        | 0.787           | 0.844           | -0.55       | 0.583           | 0.670           |
| right paracentral volume                       | <b>0.49</b> | <b>1.46e-05</b> | <b>4.86e-05</b> | <b>0.55</b> | <b>8.02e-07</b> | <b>3.27e-06</b> | 0.58        | 0.564           | 0.654           |
| right pars triangularis volume                 | <b>0.44</b> | <b>1.41e-04</b> | <b>3.98e-04</b> | <b>0.64</b> | <b>2.07e-09</b> | <b>1.19e-08</b> | <b>2.29</b> | <b>0.022</b>    | <b>0.041</b>    |
| right pars opercularis volume                  | <b>0.48</b> | <b>3.10e-05</b> | <b>9.63e-05</b> | <b>0.55</b> | <b>7.12e-07</b> | <b>2.93e-06</b> | 0.74        | 0.457           | 0.551           |
| right pars orbitalis volume                    | <b>0.38</b> | <b>0.001</b>    | <b>0.003</b>    | <b>0.59</b> | <b>5.76e-08</b> | <b>2.77e-07</b> | <b>2.33</b> | <b>0.020</b>    | <b>0.037</b>    |
| right pericalcarine volume                     | <b>0.32</b> | <b>0.006</b>    | <b>0.013</b>    | <b>0.61</b> | <b>1.63e-08</b> | <b>8.45e-08</b> | <b>2.73</b> | <b>0.006</b>    | <b>0.013</b>    |
| right postcentral volume                       | <b>0.50</b> | <b>1.04e-05</b> | <b>3.53e-05</b> | <b>0.71</b> | <b>4.10e-12</b> | <b>3.34e-11</b> | <b>2.64</b> | <b>0.008</b>    | <b>0.017</b>    |
| right posterior cingulate volume               | <b>0.37</b> | <b>0.002</b>    | <b>0.004</b>    | <b>0.67</b> | <b>2.15e-10</b> | <b>1.41e-09</b> | <b>3.31</b> | <b>9.38e-04</b> | <b>0.002</b>    |
| right precentral volume                        | <b>0.50</b> | <b>1.12e-05</b> | <b>3.80e-05</b> | <b>0.61</b> | <b>1.49e-08</b> | <b>7.78e-08</b> | 1.34        | 0.180           | 0.252           |
| right precuneus volume                         | <b>0.31</b> | <b>0.008</b>    | <b>0.017</b>    | <b>0.70</b> | <b>2.44e-11</b> | <b>1.77e-10</b> | <b>3.60</b> | <b>3.18e-04</b> | <b>8.53e-04</b> |
| right rostral anterior cingulate volume        | <b>0.53</b> | <b>2.12e-06</b> | <b>8.07e-06</b> | <b>0.71</b> | <b>5.60e-12</b> | <b>4.47e-11</b> | 2.11        | 0.035           | 0.061           |
| right rostral middle frontal volume            | <b>0.31</b> | <b>0.008</b>    | <b>0.016</b>    | <b>0.54</b> | <b>1.69e-06</b> | <b>6.49e-06</b> | <b>2.54</b> | <b>0.011</b>    | <b>0.022</b>    |
| right superior frontal volume                  | <b>0.47</b> | <b>3.63e-05</b> | <b>1.12e-04</b> | <b>0.65</b> | <b>1.05e-09</b> | <b>6.34e-09</b> | <b>2.31</b> | <b>0.021</b>    | <b>0.039</b>    |
| right superior parietal volume                 | <b>0.28</b> | <b>0.020</b>    | <b>0.037</b>    | <b>0.59</b> | <b>8.63e-08</b> | <b>4.06e-07</b> | <b>2.71</b> | <b>0.007</b>    | <b>0.014</b>    |
| right superior temporal volume                 | <b>0.53</b> | <b>2.03e-06</b> | <b>7.76e-06</b> | <b>0.79</b> | <b>8.11e-16</b> | <b>1.13e-14</b> | <b>3.42</b> | <b>6.23e-04</b> | <b>0.002</b>    |
| right supramarginal volume                     | <b>0.39</b> | <b>9.04e-04</b> | <b>0.002</b>    | <b>0.76</b> | <b>1.37e-14</b> | <b>1.56e-13</b> | <b>4.62</b> | <b>3.78e-06</b> | <b>1.39e-05</b> |
| right frontal pole volume                      | 0.03        | 0.791           | 0.847           | -0.05       | 0.658           | 0.734           | -0.53       | 0.595           | 0.679           |
| right temporal pole volume                     | 0.11        | 0.365           | 0.463           | 0.08        | 0.511           | 0.604           | -0.18       | 0.861           | 0.899           |



|                                                 |             |                 |                 |             |                 |                 |             |                 |                 |
|-------------------------------------------------|-------------|-----------------|-----------------|-------------|-----------------|-----------------|-------------|-----------------|-----------------|
| right transverse temporal volume                | 0.23        | 0.055           | 0.091           | <b>0.51</b> | <b>5.43e-06</b> | <b>1.95e-05</b> | <b>2.33</b> | <b>0.020</b>    | <b>0.037</b>    |
| right insula volume                             | 0.23        | 0.052           | 0.087           | <b>0.72</b> | <b>2.38e-12</b> | <b>2.00e-11</b> | <b>4.06</b> | <b>4.91e-05</b> | <b>1.49e-04</b> |
| left lateral ventricle subcortical volume       | <b>0.96</b> | <b>9.47e-38</b> | <b>2.58e-35</b> | <b>0.98</b> | <b>9.25e-52</b> | <b>5.04e-49</b> | <b>4.43</b> | <b>9.34e-06</b> | <b>3.22e-05</b> |
| left inf lat vent subcortical volume            | <b>0.61</b> | <b>1.48e-08</b> | <b>7.71e-08</b> | <b>0.57</b> | <b>2.08e-07</b> | <b>9.23e-07</b> | -0.40       | 0.686           | 0.756           |
| left cerebellum white matter subcortical volume | <b>0.50</b> | <b>9.03e-06</b> | <b>3.12e-05</b> | <b>0.39</b> | <b>8.08e-04</b> | <b>0.002</b>    | -0.86       | 0.391           | 0.491           |
| left cerebellum cortex subcortical volume       | <b>0.74</b> | <b>3.75e-13</b> | <b>3.53e-12</b> | <b>0.88</b> | <b>1.06e-23</b> | <b>7.41e-22</b> | <b>3.44</b> | <b>5.75e-04</b> | <b>0.001</b>    |
| left thalamus proper subcortical volume         | <b>0.41</b> | <b>5.04e-04</b> | <b>0.001</b>    | <b>0.79</b> | <b>2.92e-16</b> | <b>4.50e-15</b> | <b>4.01</b> | <b>5.96e-05</b> | <b>1.77e-04</b> |
| left caudate subcortical volume                 | <b>0.49</b> | <b>1.43e-05</b> | <b>4.79e-05</b> | <b>0.71</b> | <b>5.75e-12</b> | <b>4.57e-11</b> | <b>2.91</b> | <b>0.004</b>    | <b>0.008</b>    |
| left putamen subcortical volume                 | <b>0.38</b> | <b>0.001</b>    | <b>0.003</b>    | <b>0.57</b> | <b>2.89e-07</b> | <b>1.26e-06</b> | 1.94        | 0.052           | 0.087           |
| left pallidum subcortical volume                | <b>0.27</b> | <b>0.025</b>    | <b>0.046</b>    | <b>0.51</b> | <b>6.62e-06</b> | <b>2.34e-05</b> | 1.94        | 0.053           | 0.088           |
| 3rd ventricle subcortical volume                | <b>0.72</b> | <b>1.65e-12</b> | <b>1.43e-11</b> | <b>0.90</b> | <b>7.19e-26</b> | <b>6.80e-24</b> | <b>4.21</b> | <b>2.50e-05</b> | <b>7.92e-05</b> |
| 4th ventricle subcortical volume                | <b>0.62</b> | <b>7.64e-09</b> | <b>4.15e-08</b> | <b>0.85</b> | <b>1.33e-20</b> | <b>5.07e-19</b> | <b>3.79</b> | <b>1.53e-04</b> | <b>4.31e-04</b> |
| brain stem subcortical volume                   | <b>0.79</b> | <b>3.29e-16</b> | <b>4.97e-15</b> | <b>0.90</b> | <b>7.33e-27</b> | <b>7.60e-25</b> | <b>3.34</b> | <b>8.32e-04</b> | <b>0.002</b>    |
| left hippocampus subcortical volume             | 0.25        | 0.038           | 0.067           | <b>0.51</b> | <b>6.57e-06</b> | <b>2.33e-05</b> | 1.90        | 0.058           | 0.095           |
| left amygdala subcortical volume                | <b>0.34</b> | <b>0.004</b>    | <b>0.009</b>    | <b>0.48</b> | <b>2.92e-05</b> | <b>9.12e-05</b> | 1.18        | 0.239           | 0.325           |
| csf subcortical volume                          | <b>0.59</b> | <b>7.99e-08</b> | <b>3.78e-07</b> | <b>0.77</b> | <b>5.44e-15</b> | <b>6.59e-14</b> | <b>3.48</b> | <b>4.98e-04</b> | <b>0.001</b>    |
| left accumbens area subcortical volume          | 0.01        | 0.932           | 0.950           | 0.24        | 0.044           | 0.075           | 1.39        | 0.165           | 0.236           |
| left ventral diencephalon subcortical volume    | <b>0.49</b> | <b>1.68e-05</b> | <b>5.52e-05</b> | <b>0.69</b> | <b>5.19e-11</b> | <b>3.58e-10</b> | 2.17        | 0.030           | 0.053           |
| left vessel subcortical volume                  | 0.02        | 0.853           | 0.895           | <b>0.40</b> | <b>6.24e-04</b> | <b>0.002</b>    | 2.19        | 0.028           | 0.051           |
| left choroid plexus subcortical volume          | <b>0.52</b> | <b>3.10e-06</b> | <b>1.16e-05</b> | <b>0.74</b> | <b>3.07e-13</b> | <b>2.93e-12</b> | <b>3.43</b> | <b>5.96e-04</b> | <b>0.002</b>    |
| right lateral ventricle subcortical volume      | <b>0.92</b> | <b>3.67e-29</b> | <b>6.67e-27</b> | <b>0.98</b> | <b>3.13e-47</b> | <b>1.37e-44</b> | <b>5.15</b> | <b>2.64e-07</b> | <b>1.16e-06</b> |
| right inf lat vent subcortical volume           | <b>0.57</b> | <b>3.16e-07</b> | <b>1.37e-06</b> | <b>0.56</b> | <b>3.57e-07</b> | <b>1.54e-06</b> | -0.02       | 0.986           | 0.990           |
| cerebellum white matter subcortical volume      | <b>0.67</b> | <b>1.51e-10</b> | <b>1.01e-09</b> | <b>0.52</b> | <b>3.30e-06</b> | <b>1.22e-05</b> | -1.67       | 0.096           | 0.148           |
| cerebellum cortex subcortical volume            | <b>0.69</b> | <b>4.46e-11</b> | <b>3.11e-10</b> | <b>0.86</b> | <b>8.15e-22</b> | <b>4.44e-20</b> | <b>3.37</b> | <b>7.64e-04</b> | <b>0.002</b>    |
| right thalamus proper subcortical volume        | <b>0.30</b> | <b>0.013</b>    | <b>0.025</b>    | <b>0.75</b> | <b>1.25e-13</b> | <b>1.24e-12</b> | <b>4.44</b> | <b>8.96e-06</b> | <b>3.10e-05</b> |
| right caudate subcortical volume                | 0.25        | 0.040           | 0.070           | <b>0.48</b> | <b>2.28e-05</b> | <b>7.27e-05</b> | <b>2.47</b> | <b>0.013</b>    | <b>0.026</b>    |
| right putamen subcortical volume                | <b>0.29</b> | <b>0.014</b>    | <b>0.027</b>    | <b>0.71</b> | <b>6.78e-12</b> | <b>5.33e-11</b> | <b>3.65</b> | <b>2.65e-04</b> | <b>7.21e-04</b> |
| right pallidum subcortical volume               | 0.24        | 0.043           | 0.074           | <b>0.62</b> | <b>1.12e-08</b> | <b>5.94e-08</b> | <b>2.87</b> | <b>0.004</b>    | <b>0.009</b>    |
| right hippocampus subcortical volume            | 0.18        | 0.128           | 0.189           | <b>0.56</b> | <b>4.18e-07</b> | <b>1.78e-06</b> | <b>3.00</b> | <b>0.003</b>    | <b>0.006</b>    |
| right amygdala subcortical volume               | 0.24        | 0.048           | 0.081           | <b>0.61</b> | <b>2.04e-08</b> | <b>1.04e-07</b> | <b>3.26</b> | <b>0.001</b>    | <b>0.003</b>    |
| right accumbens area subcortical volume         | 0.19        | 0.122           | 0.181           | <b>0.41</b> | <b>4.20e-04</b> | <b>0.001</b>    | 1.44        | 0.149           | 0.215           |
| right ventral diencephalon subcortical volume   | <b>0.59</b> | <b>1.05e-07</b> | <b>4.86e-07</b> | <b>0.77</b> | <b>1.16e-14</b> | <b>1.34e-13</b> | <b>2.47</b> | <b>0.013</b>    | <b>0.026</b>    |
| right vessel subcortical volume                 | -0.05       | 0.666           | 0.740           | 0.11        | 0.359           | 0.456           | 0.98        | 0.328           | 0.422           |
| right choroid plexus subcortical volume         | <b>0.50</b> | <b>1.01e-05</b> | <b>3.45e-05</b> | <b>0.49</b> | <b>2.02e-05</b> | <b>6.52e-05</b> | -0.21       | 0.833           | 0.880           |

|                                                  |             |                 |                 |             |                 |                 |             |                 |                 |
|--------------------------------------------------|-------------|-----------------|-----------------|-------------|-----------------|-----------------|-------------|-----------------|-----------------|
| optic chiasm subcortical volume                  | 0.02        | 0.891           | 0.921           | 0.24        | 0.048           | 0.081           | 1.31        | 0.190           | 0.264           |
| corpus callosum posterior subcortical volume     | <b>0.44</b> | <b>1.58e-04</b> | <b>4.42e-04</b> | <b>0.77</b> | <b>9.33e-15</b> | <b>1.09e-13</b> | <b>4.28</b> | <b>1.86e-05</b> | <b>6.06e-05</b> |
| corpus callosum mid posterior subcortical volume | 0.17        | 0.152           | 0.219           | <b>0.55</b> | <b>7.23e-07</b> | <b>2.96e-06</b> | <b>3.87</b> | <b>1.10e-04</b> | <b>3.16e-04</b> |
| corpus callosum central subcortical volume       | <b>0.31</b> | <b>0.009</b>    | <b>0.018</b>    | <b>0.52</b> | <b>4.90e-06</b> | <b>1.78e-05</b> | 1.97        | 0.049           | 0.082           |
| corpus callosum mid anterior subcortical volume  | <b>0.34</b> | <b>0.004</b>    | <b>0.010</b>    | <b>0.56</b> | <b>4.51e-07</b> | <b>1.92e-06</b> | <b>2.63</b> | <b>0.008</b>    | <b>0.017</b>    |
| corpus callosum anterior subcortical volume      | <b>0.47</b> | <b>4.15e-05</b> | <b>1.27e-04</b> | <b>0.84</b> | <b>4.46e-20</b> | <b>1.45e-18</b> | <b>5.15</b> | <b>2.66e-07</b> | <b>1.17e-06</b> |

**STable 3.** Intra-class correlations (ICCs) of regional measurements from standard versus SynthSR-processed axial 64mT scans with 3T scans. Differences between ICC strengths were tested using Steiger's Z. A positive Z-value indicates that SynthSR-processed regions were more strongly correlated to 3T scans than standard regions. Analyses that are statistically significant after correction for multiple comparisons are in bold.

| Measurement                                      | Standard Axial 64mT ICC with 3T |              |              | SynthSR-Processed Axial 64mT ICC with 3T |                 |                 | Steiger     |              |              |
|--------------------------------------------------|---------------------------------|--------------|--------------|------------------------------------------|-----------------|-----------------|-------------|--------------|--------------|
|                                                  | ICC                             | p            | q            | ICC                                      | p               | q               | z           | p            | q            |
| left banks of superior temporal sulcus thickness | -0.20                           | 0.952        | 0.977        | -0.06                                    | 0.684           | 0.774           | 0.96        | 0.336        | 0.443        |
| left caudal anterior cingulate thickness         | 0.01                            | 0.462        | 0.572        | 0.23                                     | 0.028           | 0.051           | 1.44        | 0.149        | 0.224        |
| left caudal middle frontal thickness             | 0.17                            | 0.079        | 0.130        | <b>0.35</b>                              | <b>0.001</b>    | <b>0.003</b>    | 1.29        | 0.199        | 0.286        |
| left cuneus thickness                            | 0.09                            | 0.239        | 0.336        | 0.14                                     | 0.129           | 0.200           | 0.32        | 0.748        | 0.827        |
| left entorhinal thickness                        | -5.2e-03                        | 0.517        | 0.621        | 4.4e-03                                  | 0.485           | 0.592           | 0.06        | 0.954        | 0.977        |
| left fusiform thickness                          | -0.12                           | 0.847        | 0.907        | 0.16                                     | 0.092           | 0.149           | 1.65        | 0.100        | 0.160        |
| left inferior parietal thickness                 | -0.15                           | 0.898        | 0.941        | 0.16                                     | 0.085           | 0.139           | <b>2.29</b> | <b>0.022</b> | <b>0.041</b> |
| left inferior temporal thickness                 | 0.07                            | 0.293        | 0.396        | 0.16                                     | 0.091           | 0.147           | 0.55        | 0.584        | 0.683        |
| left isthmus cingulate thickness                 | -0.02                           | 0.577        | 0.678        | 0.08                                     | 0.267           | 0.368           | 0.54        | 0.589        | 0.687        |
| left lateral occipital thickness                 | 7.3e-03                         | 0.476        | 0.584        | 0.06                                     | 0.300           | 0.402           | 0.36        | 0.718        | 0.803        |
| left lateral orbitofrontal thickness             | -0.03                           | 0.609        | 0.705        | 0.19                                     | 0.056           | 0.095           | 1.53        | 0.126        | 0.196        |
| left lingual thickness                           | 0.07                            | 0.274        | 0.376        | -0.06                                    | 0.684           | 0.774           | -0.71       | 0.477        | 0.585        |
| left medial orbitofrontal thickness              | -0.29                           | 0.992        | 0.996        | 0.17                                     | 0.073           | 0.122           | <b>2.51</b> | <b>0.012</b> | <b>0.024</b> |
| left middle temporal thickness                   | -0.19                           | 0.940        | 0.972        | <b>0.29</b>                              | <b>0.006</b>    | <b>0.013</b>    | <b>2.76</b> | <b>0.006</b> | <b>0.012</b> |
| left parahippocampal thickness                   | 0.01                            | 0.454        | 0.565        | <b>0.35</b>                              | <b>0.001</b>    | <b>0.003</b>    | 2.11        | 0.035        | 0.062        |
| left paracentral thickness                       | 0.05                            | 0.346        | 0.454        | 0.04                                     | 0.380           | 0.491           | -0.07       | 0.946        | 0.974        |
| left pars triangularis thickness                 | <b>0.29</b>                     | <b>0.007</b> | <b>0.016</b> | <b>0.33</b>                              | <b>0.002</b>    | <b>0.005</b>    | 0.32        | 0.748        | 0.827        |
| left pars opercularis thickness                  | -0.12                           | 0.842        | 0.903        | -0.02                                    | 0.578           | 0.678           | 0.70        | 0.485        | 0.591        |
| left pars orbitalis thickness                    | -0.19                           | 0.943        | 0.973        | -2.8e-05                                 | 0.500           | 0.604           | 1.19        | 0.235        | 0.332        |
| left pericalcarine thickness                     | 0.07                            | 0.274        | 0.376        | -0.20                                    | 0.953           | 0.977           | -1.72       | 0.085        | 0.139        |
| left postcentral thickness                       | 0.12                            | 0.151        | 0.226        | 0.22                                     | 0.034           | 0.061           | 0.62        | 0.538        | 0.639        |
| left posterior cingulate thickness               | -0.13                           | 0.863        | 0.913        | <b>0.23</b>                              | <b>0.026</b>    | <b>0.047</b>    | 2.12        | 0.034        | 0.061        |
| left precentral thickness                        | 0.08                            | 0.244        | 0.342        | 0.19                                     | 0.061           | 0.103           | 0.70        | 0.485        | 0.591        |
| left precuneus thickness                         | 0.06                            | 0.305        | 0.408        | <b>0.40</b>                              | <b>2.87e-04</b> | <b>7.85e-04</b> | <b>2.28</b> | <b>0.023</b> | <b>0.042</b> |
| left rostral anterior cingulate thickness        | -0.24                           | 0.978        | 0.991        | -0.02                                    | 0.552           | 0.655           | 1.54        | 0.124        | 0.192        |
| left rostral middle frontal thickness            | -0.01                           | 0.542        | 0.643        | 0.09                                     | 0.232           | 0.327           | 0.79        | 0.428        | 0.539        |
| left superior frontal thickness                  | 0.02                            | 0.421        | 0.534        | <b>0.36</b>                              | <b>0.001</b>    | <b>0.003</b>    | <b>2.68</b> | <b>0.007</b> | <b>0.015</b> |
| left superior parietal thickness                 | 0.04                            | 0.373        | 0.485        | 0.11                                     | 0.184           | 0.268           | 0.43        | 0.666        | 0.757        |
| left superior temporal thickness                 | -0.20                           | 0.952        | 0.977        | <b>0.31</b>                              | <b>0.004</b>    | <b>0.010</b>    | <b>2.90</b> | <b>0.004</b> | <b>0.008</b> |
| left supramarginal thickness                     | 0.02                            | 0.438        | 0.550        | <b>0.41</b>                              | <b>2.07e-04</b> | <b>5.82e-04</b> | <b>2.44</b> | <b>0.015</b> | <b>0.029</b> |

|                                                   |         |       |       |             |                 |                 |             |                 |                 |
|---------------------------------------------------|---------|-------|-------|-------------|-----------------|-----------------|-------------|-----------------|-----------------|
| left frontal pole thickness                       | -0.22   | 0.968 | 0.986 | -0.33       | 0.998           | 0.998           | -0.71       | 0.478           | 0.586           |
| left temporal pole thickness                      | -0.10   | 0.799 | 0.869 | 0.13        | 0.136           | 0.208           | 1.35        | 0.177           | 0.259           |
| left transverse temporal thickness                | -0.25   | 0.980 | 0.993 | <b>0.27</b> | <b>0.012</b>    | <b>0.024</b>    | <b>3.08</b> | <b>0.002</b>    | <b>0.005</b>    |
| left insula thickness                             | -0.06   | 0.699 | 0.785 | -0.09       | 0.775           | 0.851           | -0.19       | 0.852           | 0.908           |
| right banks of superior temporal sulcus thickness | -0.10   | 0.789 | 0.862 | 0.10        | 0.196           | 0.282           | 1.39        | 0.163           | 0.242           |
| right caudal anterior cingulate thickness         | -0.13   | 0.859 | 0.912 | 8.8e-03     | 0.471           | 0.581           | 0.76        | 0.444           | 0.556           |
| right caudal middle frontal thickness             | 0.05    | 0.344 | 0.452 | <b>0.29</b> | <b>0.007</b>    | <b>0.015</b>    | 1.49        | 0.137           | 0.209           |
| right cuneus thickness                            | 0.07    | 0.277 | 0.379 | 0.14        | 0.122           | 0.190           | 0.39        | 0.694           | 0.782           |
| right entorhinal thickness                        | -0.10   | 0.803 | 0.872 | -0.05       | 0.665           | 0.757           | 0.29        | 0.768           | 0.846           |
| right fusiform thickness                          | -0.14   | 0.882 | 0.925 | -0.32       | 0.997           | 0.997           | -1.14       | 0.256           | 0.355           |
| right inferior parietal thickness                 | -0.17   | 0.923 | 0.960 | 0.06        | 0.323           | 0.428           | 1.60        | 0.109           | 0.173           |
| right inferior temporal thickness                 | -0.10   | 0.801 | 0.871 | -2.7e-03    | 0.509           | 0.614           | 0.63        | 0.528           | 0.630           |
| right isthmus cingulate thickness                 | -0.01   | 0.537 | 0.639 | 0.06        | 0.305           | 0.408           | 0.43        | 0.667           | 0.758           |
| right lateral occipital thickness                 | 0.13    | 0.139 | 0.212 | 0.06        | 0.323           | 0.428           | -0.57       | 0.567           | 0.671           |
| right lateral orbitofrontal thickness             | -0.04   | 0.637 | 0.731 | 0.09        | 0.237           | 0.334           | 0.75        | 0.454           | 0.565           |
| right lingual thickness                           | -0.03   | 0.610 | 0.705 | 0.06        | 0.324           | 0.428           | 0.52        | 0.603           | 0.700           |
| right medial orbitofrontal thickness              | -0.31   | 0.996 | 0.997 | -0.05       | 0.651           | 0.745           | 1.78        | 0.075           | 0.124           |
| right middle temporal thickness                   | -0.27   | 0.988 | 0.995 | 0.17        | 0.082           | 0.134           | <b>2.65</b> | <b>0.008</b>    | <b>0.017</b>    |
| right parahippocampal thickness                   | 0.08    | 0.252 | 0.350 | <b>0.38</b> | <b>5.29e-04</b> | <b>0.001</b>    | 1.81        | 0.071           | 0.119           |
| right paracentral thickness                       | 0.14    | 0.125 | 0.194 | 0.09        | 0.232           | 0.327           | -0.33       | 0.745           | 0.825           |
| right pars triangularis thickness                 | 0.19    | 0.059 | 0.100 | 0.20        | 0.051           | 0.089           | 0.06        | 0.954           | 0.977           |
| right pars opercularis thickness                  | -0.04   | 0.638 | 0.732 | <b>0.27</b> | <b>0.011</b>    | <b>0.022</b>    | 1.94        | 0.053           | 0.091           |
| right pars orbitalis thickness                    | 2.8e-03 | 0.491 | 0.597 | <b>0.24</b> | <b>0.020</b>    | <b>0.038</b>    | 1.76        | 0.078           | 0.129           |
| right pericalcarine thickness                     | -0.02   | 0.572 | 0.674 | -7.4e-03    | 0.524           | 0.627           | 0.09        | 0.926           | 0.962           |
| right postcentral thickness                       | 0.15    | 0.113 | 0.177 | <b>0.24</b> | <b>0.020</b>    | <b>0.039</b>    | 0.71        | 0.475           | 0.584           |
| right posterior cingulate thickness               | -0.07   | 0.731 | 0.815 | 0.23        | 0.028           | 0.051           | 1.99        | 0.047           | 0.082           |
| right precentral thickness                        | 0.16    | 0.092 | 0.148 | -0.05       | 0.673           | 0.763           | -1.60       | 0.110           | 0.174           |
| right precuneus thickness                         | 0.06    | 0.299 | 0.402 | 0.20        | 0.047           | 0.082           | 0.93        | 0.354           | 0.463           |
| right rostral anterior cingulate thickness        | -0.30   | 0.994 | 0.997 | -0.12       | 0.835           | 0.897           | 1.17        | 0.243           | 0.341           |
| right rostral middle frontal thickness            | -0.18   | 0.932 | 0.966 | 0.03        | 0.413           | 0.526           | 1.36        | 0.173           | 0.255           |
| right superior frontal thickness                  | 0.16    | 0.098 | 0.157 | 0.11        | 0.186           | 0.269           | -0.34       | 0.734           | 0.817           |
| right superior parietal thickness                 | 0.10    | 0.200 | 0.288 | 0.08        | 0.265           | 0.366           | -0.18       | 0.858           | 0.911           |
| right superior temporal thickness                 | -0.17   | 0.922 | 0.959 | <b>0.43</b> | <b>1.10e-04</b> | <b>3.22e-04</b> | <b>4.02</b> | <b>5.82e-05</b> | <b>1.79e-04</b> |
| right supramarginal thickness                     | 0.18    | 0.062 | 0.105 | <b>0.39</b> | <b>3.63e-04</b> | <b>9.73e-04</b> | 1.63        | 0.104           | 0.165           |

|                                             |             |                 |                 |             |                 |                 |             |                 |                 |
|---------------------------------------------|-------------|-----------------|-----------------|-------------|-----------------|-----------------|-------------|-----------------|-----------------|
| right frontal pole thickness                | -0.09       | 0.780           | 0.856           | -0.12       | 0.848           | 0.907           | -0.18       | 0.856           | 0.911           |
| right temporal pole thickness               | 0.10        | 0.213           | 0.304           | 0.22        | 0.031           | 0.056           | 0.79        | 0.430           | 0.541           |
| right transverse temporal thickness         | -0.02       | 0.572           | 0.674           | 0.06        | 0.296           | 0.399           | 0.54        | 0.590           | 0.688           |
| right insula thickness                      | -0.06       | 0.678           | 0.768           | 0.15        | 0.104           | 0.166           | 1.20        | 0.230           | 0.325           |
| left banks of superior temporal sulcus area | <b>0.34</b> | <b>0.002</b>    | <b>0.004</b>    | <b>0.73</b> | <b>3.00e-13</b> | <b>2.91e-12</b> | <b>3.94</b> | <b>8.19e-05</b> | <b>2.46e-04</b> |
| left caudal anterior cingulate area         | <b>0.28</b> | <b>0.008</b>    | <b>0.017</b>    | <b>0.44</b> | <b>7.06e-05</b> | <b>2.14e-04</b> | 1.78        | 0.075           | 0.124           |
| left caudal middle frontal area             | <b>0.29</b> | <b>0.007</b>    | <b>0.015</b>    | <b>0.73</b> | <b>1.89e-13</b> | <b>1.88e-12</b> | <b>4.19</b> | <b>2.76e-05</b> | <b>9.10e-05</b> |
| left cuneus area                            | <b>0.41</b> | <b>2.15e-04</b> | <b>6.02e-04</b> | <b>0.62</b> | <b>2.91e-09</b> | <b>1.69e-08</b> | 1.78        | 0.075           | 0.124           |
| left entorhinal area                        | -0.06       | 0.692           | 0.781           | <b>0.30</b> | <b>0.006</b>    | <b>0.013</b>    | 2.00        | 0.046           | 0.081           |
| left fusiform area                          | <b>0.31</b> | <b>0.005</b>    | <b>0.010</b>    | <b>0.64</b> | <b>1.02e-09</b> | <b>6.21e-09</b> | <b>2.50</b> | <b>0.012</b>    | <b>0.025</b>    |
| left inferior parietal area                 | <b>0.57</b> | <b>1.03e-07</b> | <b>4.99e-07</b> | <b>0.84</b> | <b>3.69e-20</b> | <b>1.22e-18</b> | <b>3.75</b> | <b>1.79e-04</b> | <b>5.09e-04</b> |
| left inferior temporal area                 | <b>0.42</b> | <b>1.25e-04</b> | <b>3.64e-04</b> | <b>0.72</b> | <b>5.88e-13</b> | <b>5.57e-12</b> | <b>2.87</b> | <b>0.004</b>    | <b>0.009</b>    |
| left isthmus cingulate area                 | <b>0.33</b> | <b>0.002</b>    | <b>0.005</b>    | <b>0.50</b> | <b>3.76e-06</b> | <b>1.43e-05</b> | 1.24        | 0.214           | 0.306           |
| left lateral occipital area                 | <b>0.32</b> | <b>0.003</b>    | <b>0.007</b>    | <b>0.52</b> | <b>1.99e-06</b> | <b>7.90e-06</b> | 1.44        | 0.151           | 0.226           |
| left lateral orbitofrontal area             | <b>0.51</b> | <b>2.90e-06</b> | <b>1.13e-05</b> | <b>0.67</b> | <b>9.41e-11</b> | <b>6.54e-10</b> | 1.74        | 0.082           | 0.134           |
| left lingual area                           | <b>0.24</b> | <b>0.023</b>    | <b>0.042</b>    | <b>0.58</b> | <b>4.25e-08</b> | <b>2.13e-07</b> | <b>2.51</b> | <b>0.012</b>    | <b>0.024</b>    |
| left medial orbitofrontal area              | <b>0.48</b> | <b>1.09e-05</b> | <b>3.84e-05</b> | <b>0.50</b> | <b>3.73e-06</b> | <b>1.42e-05</b> | 0.22        | 0.824           | 0.889           |
| left middle temporal area                   | <b>0.45</b> | <b>4.19e-05</b> | <b>1.32e-04</b> | <b>0.72</b> | <b>8.58e-13</b> | <b>7.88e-12</b> | <b>2.70</b> | <b>0.007</b>    | <b>0.015</b>    |
| left parahippocampal area                   | -0.16       | 0.906           | 0.947           | 0.21        | 0.039           | 0.069           | 2.06        | 0.039           | 0.070           |
| left paracentral area                       | <b>0.34</b> | <b>0.002</b>    | <b>0.004</b>    | <b>0.75</b> | <b>3.25e-14</b> | <b>3.61e-13</b> | <b>3.73</b> | <b>1.93e-04</b> | <b>5.47e-04</b> |
| left pars triangularis area                 | <b>0.40</b> | <b>3.23e-04</b> | <b>8.75e-04</b> | <b>0.65</b> | <b>4.52e-10</b> | <b>2.87e-09</b> | <b>2.54</b> | <b>0.011</b>    | <b>0.022</b>    |
| left pars opercularis area                  | <b>0.45</b> | <b>4.43e-05</b> | <b>1.39e-04</b> | <b>0.48</b> | <b>1.10e-05</b> | <b>3.87e-05</b> | 0.27        | 0.789           | 0.862           |
| left pars orbitalis area                    | <b>0.59</b> | <b>4.06e-08</b> | <b>2.04e-07</b> | <b>0.63</b> | <b>1.97e-09</b> | <b>1.18e-08</b> | 0.48        | 0.631           | 0.726           |
| left pericalcarine area                     | <b>0.33</b> | <b>0.002</b>    | <b>0.006</b>    | <b>0.65</b> | <b>5.25e-10</b> | <b>3.31e-09</b> | <b>2.78</b> | <b>0.005</b>    | <b>0.012</b>    |
| left postcentral area                       | 0.20        | 0.044           | 0.078           | <b>0.70</b> | <b>5.61e-12</b> | <b>4.67e-11</b> | <b>4.25</b> | <b>2.09e-05</b> | <b>7.02e-05</b> |
| left posterior cingulate area               | <b>0.30</b> | <b>0.006</b>    | <b>0.013</b>    | <b>0.57</b> | <b>8.80e-08</b> | <b>4.26e-07</b> | <b>2.48</b> | <b>0.013</b>    | <b>0.026</b>    |
| left precentral area                        | <b>0.35</b> | <b>0.001</b>    | <b>0.003</b>    | <b>0.82</b> | <b>6.55e-19</b> | <b>1.68e-17</b> | <b>5.50</b> | <b>3.76e-08</b> | <b>1.90e-07</b> |
| left precuneus area                         | <b>0.31</b> | <b>0.004</b>    | <b>0.010</b>    | <b>0.72</b> | <b>6.43e-13</b> | <b>6.07e-12</b> | <b>3.58</b> | <b>3.48e-04</b> | <b>9.36e-04</b> |
| left rostral anterior cingulate area        | <b>0.33</b> | <b>0.003</b>    | <b>0.006</b>    | <b>0.60</b> | <b>1.25e-08</b> | <b>6.71e-08</b> | <b>2.70</b> | <b>0.007</b>    | <b>0.014</b>    |
| left rostral middle frontal area            | <b>0.56</b> | <b>2.02e-07</b> | <b>9.38e-07</b> | <b>0.73</b> | <b>1.92e-13</b> | <b>1.91e-12</b> | <b>2.52</b> | <b>0.012</b>    | <b>0.024</b>    |
| left superior frontal area                  | <b>0.52</b> | <b>1.89e-06</b> | <b>7.54e-06</b> | <b>0.76</b> | <b>5.76e-15</b> | <b>6.97e-14</b> | <b>3.22</b> | <b>0.001</b>    | <b>0.003</b>    |
| left superior parietal area                 | <b>0.37</b> | <b>7.83e-04</b> | <b>0.002</b>    | <b>0.67</b> | <b>1.04e-10</b> | <b>7.15e-10</b> | <b>2.61</b> | <b>0.009</b>    | <b>0.018</b>    |
| left superior temporal area                 | <b>0.29</b> | <b>0.008</b>    | <b>0.016</b>    | <b>0.78</b> | <b>6.94e-16</b> | <b>1.00e-14</b> | <b>5.14</b> | <b>2.79e-07</b> | <b>1.26e-06</b> |
| left supramarginal area                     | <b>0.50</b> | <b>3.88e-06</b> | <b>1.47e-05</b> | <b>0.78</b> | <b>7.28e-16</b> | <b>1.04e-14</b> | <b>3.28</b> | <b>0.001</b>    | <b>0.003</b>    |
| left frontal pole area                      | <b>0.24</b> | <b>0.020</b>    | <b>0.038</b>    | <b>0.24</b> | <b>0.020</b>    | <b>0.038</b>    | 5.8e-03     | 0.995           | 0.997           |

|                                              |             |                 |                 |             |                 |                 |             |                 |                 |
|----------------------------------------------|-------------|-----------------|-----------------|-------------|-----------------|-----------------|-------------|-----------------|-----------------|
| left temporal pole area                      | -0.06       | 0.693           | 0.781           | 0.12        | 0.151           | 0.226           | 1.06        | 0.289           | 0.391           |
| left transverse temporal area                | 0.13        | 0.145           | 0.219           | <b>0.72</b> | <b>9.76e-13</b> | <b>8.85e-12</b> | <b>4.52</b> | <b>6.20e-06</b> | <b>2.30e-05</b> |
| left insula area                             | <b>0.27</b> | <b>0.012</b>    | <b>0.024</b>    | <b>0.77</b> | <b>3.37e-15</b> | <b>4.37e-14</b> | <b>4.63</b> | <b>3.73e-06</b> | <b>1.42e-05</b> |
| right banks of superior temporal sulcus area | <b>0.39</b> | <b>3.81e-04</b> | <b>0.001</b>    | <b>0.68</b> | <b>3.30e-11</b> | <b>2.38e-10</b> | <b>2.65</b> | <b>0.008</b>    | <b>0.017</b>    |
| right caudal anterior cingulate area         | <b>0.49</b> | <b>8.19e-06</b> | <b>2.97e-05</b> | <b>0.71</b> | <b>2.68e-12</b> | <b>2.30e-11</b> | <b>2.51</b> | <b>0.012</b>    | <b>0.024</b>    |
| right caudal middle frontal area             | <b>0.40</b> | <b>2.76e-04</b> | <b>7.58e-04</b> | <b>0.60</b> | <b>2.11e-08</b> | <b>1.11e-07</b> | 1.93        | 0.054           | 0.093           |
| right cuneus area                            | 0.17        | 0.073           | 0.122           | <b>0.51</b> | <b>2.92e-06</b> | <b>1.13e-05</b> | <b>2.79</b> | <b>0.005</b>    | <b>0.011</b>    |
| right entorhinal area                        | -0.13       | 0.863           | 0.913           | 0.12        | 0.151           | 0.226           | 1.62        | 0.106           | 0.168           |
| right fusiform area                          | <b>0.43</b> | <b>1.03e-04</b> | <b>3.01e-04</b> | <b>0.76</b> | <b>6.27e-15</b> | <b>7.50e-14</b> | <b>3.38</b> | <b>7.38e-04</b> | <b>0.002</b>    |
| right inferior parietal area                 | <b>0.49</b> | <b>6.16e-06</b> | <b>2.28e-05</b> | <b>0.74</b> | <b>1.08e-13</b> | <b>1.13e-12</b> | <b>2.88</b> | <b>0.004</b>    | <b>0.009</b>    |
| right inferior temporal area                 | <b>0.52</b> | <b>1.36e-06</b> | <b>5.57e-06</b> | <b>0.76</b> | <b>5.31e-15</b> | <b>6.49e-14</b> | <b>2.80</b> | <b>0.005</b>    | <b>0.011</b>    |
| right isthmus cingulate area                 | 0.17        | 0.072           | 0.121           | <b>0.72</b> | <b>5.67e-13</b> | <b>5.40e-12</b> | <b>4.78</b> | <b>1.80e-06</b> | <b>7.19e-06</b> |
| right lateral occipital area                 | <b>0.54</b> | <b>6.37e-07</b> | <b>2.77e-06</b> | <b>0.64</b> | <b>1.07e-09</b> | <b>6.51e-09</b> | 1.03        | 0.305           | 0.408           |
| right lateral orbitofrontal area             | <b>0.51</b> | <b>3.26e-06</b> | <b>1.25e-05</b> | <b>0.54</b> | <b>5.13e-07</b> | <b>2.25e-06</b> | 0.35        | 0.724           | 0.809           |
| right lingual area                           | 0.10        | 0.209           | 0.299           | <b>0.60</b> | <b>2.15e-08</b> | <b>1.13e-07</b> | <b>4.30</b> | <b>1.73e-05</b> | <b>5.85e-05</b> |
| right medial orbitofrontal area              | <b>0.43</b> | <b>1.05e-04</b> | <b>3.09e-04</b> | <b>0.44</b> | <b>5.48e-05</b> | <b>1.70e-04</b> | 0.13        | 0.897           | 0.940           |
| right middle temporal area                   | <b>0.45</b> | <b>4.27e-05</b> | <b>1.35e-04</b> | <b>0.74</b> | <b>5.16e-14</b> | <b>5.54e-13</b> | <b>3.38</b> | <b>7.28e-04</b> | <b>0.002</b>    |
| right parahippocampal area                   | 0.02        | 0.433           | 0.545           | <b>0.28</b> | <b>0.009</b>    | <b>0.018</b>    | 1.57        | 0.117           | 0.184           |
| right paracentral area                       | <b>0.36</b> | <b>9.93e-04</b> | <b>0.002</b>    | <b>0.61</b> | <b>6.80e-09</b> | <b>3.77e-08</b> | <b>2.41</b> | <b>0.016</b>    | <b>0.031</b>    |
| right pars triangularis area                 | <b>0.42</b> | <b>1.46e-04</b> | <b>4.19e-04</b> | <b>0.75</b> | <b>2.16e-14</b> | <b>2.48e-13</b> | <b>3.97</b> | <b>7.29e-05</b> | <b>2.21e-04</b> |
| right pars opercularis area                  | <b>0.48</b> | <b>1.10e-05</b> | <b>3.85e-05</b> | <b>0.54</b> | <b>7.38e-07</b> | <b>3.16e-06</b> | 0.51        | 0.610           | 0.705           |
| right pars orbitalis area                    | <b>0.35</b> | <b>0.001</b>    | <b>0.003</b>    | <b>0.64</b> | <b>1.09e-09</b> | <b>6.59e-09</b> | <b>2.85</b> | <b>0.004</b>    | <b>0.010</b>    |
| right pericalcarine area                     | <b>0.44</b> | <b>6.86e-05</b> | <b>2.09e-04</b> | <b>0.68</b> | <b>4.82e-11</b> | <b>3.43e-10</b> | <b>2.55</b> | <b>0.011</b>    | <b>0.022</b>    |
| right postcentral area                       | <b>0.43</b> | <b>7.50e-05</b> | <b>2.26e-04</b> | <b>0.68</b> | <b>3.47e-11</b> | <b>2.50e-10</b> | <b>2.76</b> | <b>0.006</b>    | <b>0.013</b>    |
| right posterior cingulate area               | <b>0.32</b> | <b>0.003</b>    | <b>0.007</b>    | <b>0.69</b> | <b>8.85e-12</b> | <b>7.14e-11</b> | <b>4.14</b> | <b>3.50e-05</b> | <b>1.12e-04</b> |
| right precentral area                        | <b>0.48</b> | <b>1.16e-05</b> | <b>4.03e-05</b> | <b>0.63</b> | <b>2.70e-09</b> | <b>1.58e-08</b> | 1.51        | 0.132           | 0.203           |
| right precuneus area                         | <b>0.43</b> | <b>8.69e-05</b> | <b>2.58e-04</b> | <b>0.70</b> | <b>5.93e-12</b> | <b>4.91e-11</b> | <b>2.60</b> | <b>0.009</b>    | <b>0.019</b>    |
| right rostral anterior cingulate area        | <b>0.41</b> | <b>1.91e-04</b> | <b>5.40e-04</b> | <b>0.78</b> | <b>4.33e-16</b> | <b>6.50e-15</b> | <b>4.32</b> | <b>1.56e-05</b> | <b>5.32e-05</b> |
| right rostral middle frontal area            | <b>0.40</b> | <b>2.73e-04</b> | <b>7.50e-04</b> | <b>0.64</b> | <b>1.18e-09</b> | <b>7.13e-09</b> | <b>2.42</b> | <b>0.016</b>    | <b>0.030</b>    |
| right superior frontal area                  | <b>0.51</b> | <b>3.49e-06</b> | <b>1.34e-05</b> | <b>0.69</b> | <b>2.11e-11</b> | <b>1.58e-10</b> | <b>2.32</b> | <b>0.020</b>    | <b>0.038</b>    |
| right superior parietal area                 | 0.21        | 0.040           | 0.071           | <b>0.60</b> | <b>2.17e-08</b> | <b>1.13e-07</b> | <b>3.14</b> | <b>0.002</b>    | <b>0.004</b>    |
| right superior temporal area                 | <b>0.48</b> | <b>1.18e-05</b> | <b>4.10e-05</b> | <b>0.77</b> | <b>3.04e-15</b> | <b>3.96e-14</b> | <b>3.52</b> | <b>4.36e-04</b> | <b>0.001</b>    |
| right supramarginal area                     | <b>0.27</b> | <b>0.011</b>    | <b>0.023</b>    | <b>0.66</b> | <b>2.02e-10</b> | <b>1.34e-09</b> | <b>3.68</b> | <b>2.33e-04</b> | <b>6.52e-04</b> |
| right frontal pole area                      | <b>0.26</b> | <b>0.014</b>    | <b>0.028</b>    | 0.13        | 0.139           | 0.212           | -0.88       | 0.381           | 0.492           |

|                                               |             |                 |                 |             |                 |                 |             |                 |                 |
|-----------------------------------------------|-------------|-----------------|-----------------|-------------|-----------------|-----------------|-------------|-----------------|-----------------|
| right temporal pole area                      | 4.7e-03     | 0.485           | 0.591           | 0.06        | 0.314           | 0.417           | 0.32        | 0.747           | 0.826           |
| right transverse temporal area                | <b>0.25</b> | <b>0.016</b>    | <b>0.031</b>    | <b>0.58</b> | <b>4.47e-08</b> | <b>2.23e-07</b> | <b>2.64</b> | <b>0.008</b>    | <b>0.017</b>    |
| right insula area                             | 0.16        | 0.087           | 0.142           | <b>0.66</b> | <b>1.30e-10</b> | <b>8.82e-10</b> | <b>3.80</b> | <b>1.42e-04</b> | <b>4.10e-04</b> |
| left banks of superior temporal sulcus volume | <b>0.25</b> | <b>0.017</b>    | <b>0.033</b>    | <b>0.67</b> | <b>1.01e-10</b> | <b>6.96e-10</b> | <b>4.31</b> | <b>1.61e-05</b> | <b>5.49e-05</b> |
| left caudal anterior cingulate volume         | <b>0.29</b> | <b>0.008</b>    | <b>0.016</b>    | <b>0.54</b> | <b>6.53e-07</b> | <b>2.83e-06</b> | <b>3.09</b> | <b>0.002</b>    | <b>0.005</b>    |
| left caudal middle frontal volume             | <b>0.34</b> | <b>0.002</b>    | <b>0.004</b>    | <b>0.69</b> | <b>1.83e-11</b> | <b>1.42e-10</b> | <b>3.25</b> | <b>0.001</b>    | <b>0.003</b>    |
| left cuneus volume                            | <b>0.30</b> | <b>0.005</b>    | <b>0.011</b>    | <b>0.65</b> | <b>3.69e-10</b> | <b>2.37e-09</b> | <b>2.86</b> | <b>0.004</b>    | <b>0.009</b>    |
| left entorhinal volume                        | -0.10       | 0.798           | 0.868           | <b>0.31</b> | <b>0.004</b>    | <b>0.009</b>    | <b>2.31</b> | <b>0.021</b>    | <b>0.039</b>    |
| left fusiform volume                          | <b>0.31</b> | <b>0.005</b>    | <b>0.010</b>    | <b>0.66</b> | <b>2.41e-10</b> | <b>1.58e-09</b> | <b>2.70</b> | <b>0.007</b>    | <b>0.014</b>    |
| left inferior parietal volume                 | <b>0.53</b> | <b>1.21e-06</b> | <b>5.01e-06</b> | <b>0.82</b> | <b>9.68e-19</b> | <b>2.32e-17</b> | <b>3.92</b> | <b>8.98e-05</b> | <b>2.65e-04</b> |
| left inferior temporal volume                 | <b>0.45</b> | <b>4.57e-05</b> | <b>1.43e-04</b> | <b>0.78</b> | <b>9.63e-16</b> | <b>1.34e-14</b> | <b>3.55</b> | <b>3.86e-04</b> | <b>0.001</b>    |
| left isthmus cingulate volume                 | <b>0.30</b> | <b>0.006</b>    | <b>0.013</b>    | <b>0.49</b> | <b>6.05e-06</b> | <b>2.25e-05</b> | 1.38        | 0.166           | 0.246           |
| left lateral occipital volume                 | <b>0.39</b> | <b>4.22e-04</b> | <b>0.001</b>    | <b>0.55</b> | <b>4.08e-07</b> | <b>1.81e-06</b> | 1.36        | 0.175           | 0.257           |
| left lateral orbitofrontal volume             | <b>0.47</b> | <b>2.19e-05</b> | <b>7.34e-05</b> | <b>0.69</b> | <b>2.11e-11</b> | <b>1.58e-10</b> | <b>2.28</b> | <b>0.023</b>    | <b>0.043</b>    |
| left lingual volume                           | 0.12        | 0.155           | 0.231           | <b>0.65</b> | <b>4.22e-10</b> | <b>2.69e-09</b> | <b>4.14</b> | <b>3.46e-05</b> | <b>1.11e-04</b> |
| left medial orbitofrontal volume              | <b>0.28</b> | <b>0.009</b>    | <b>0.018</b>    | <b>0.41</b> | <b>1.72e-04</b> | <b>4.93e-04</b> | 1.05        | 0.296           | 0.399           |
| left middle temporal volume                   | <b>0.30</b> | <b>0.006</b>    | <b>0.013</b>    | <b>0.71</b> | <b>2.30e-12</b> | <b>1.99e-11</b> | <b>3.78</b> | <b>1.57e-04</b> | <b>4.52e-04</b> |
| left parahippocampal volume                   | -0.03       | 0.603           | 0.700           | 0.16        | 0.087           | 0.141           | 1.15        | 0.252           | 0.350           |
| left paracentral volume                       | <b>0.31</b> | <b>0.004</b>    | <b>0.009</b>    | <b>0.65</b> | <b>4.69e-10</b> | <b>2.97e-09</b> | <b>2.82</b> | <b>0.005</b>    | <b>0.011</b>    |
| left pars triangularis volume                 | <b>0.46</b> | <b>3.10e-05</b> | <b>1.00e-04</b> | <b>0.62</b> | <b>4.56e-09</b> | <b>2.59e-08</b> | 1.89        | 0.058           | 0.100           |
| left pars opercularis volume                  | <b>0.35</b> | <b>0.001</b>    | <b>0.003</b>    | <b>0.43</b> | <b>8.63e-05</b> | <b>2.56e-04</b> | 0.64        | 0.520           | 0.623           |
| left pars orbitalis volume                    | <b>0.53</b> | <b>7.98e-07</b> | <b>3.40e-06</b> | <b>0.58</b> | <b>5.73e-08</b> | <b>2.82e-07</b> | 0.46        | 0.646           | 0.740           |
| left pericalcarine volume                     | <b>0.31</b> | <b>0.004</b>    | <b>0.009</b>    | <b>0.56</b> | <b>1.67e-07</b> | <b>7.79e-07</b> | 2.06        | 0.039           | 0.070           |
| left postcentral volume                       | 0.22        | 0.034           | 0.061           | <b>0.67</b> | <b>1.19e-10</b> | <b>8.14e-10</b> | <b>3.70</b> | <b>2.13e-04</b> | <b>5.99e-04</b> |
| left posterior cingulate volume               | <b>0.27</b> | <b>0.011</b>    | <b>0.022</b>    | <b>0.54</b> | <b>4.56e-07</b> | <b>2.01e-06</b> | <b>2.41</b> | <b>0.016</b>    | <b>0.031</b>    |
| left precentral volume                        | <b>0.35</b> | <b>0.001</b>    | <b>0.003</b>    | <b>0.77</b> | <b>2.03e-15</b> | <b>2.72e-14</b> | <b>5.02</b> | <b>5.23e-07</b> | <b>2.29e-06</b> |
| left precuneus volume                         | <b>0.27</b> | <b>0.011</b>    | <b>0.022</b>    | <b>0.69</b> | <b>1.22e-11</b> | <b>9.68e-11</b> | <b>3.65</b> | <b>2.62e-04</b> | <b>7.27e-04</b> |
| left rostral anterior cingulate volume        | <b>0.32</b> | <b>0.003</b>    | <b>0.007</b>    | <b>0.51</b> | <b>2.28e-06</b> | <b>8.97e-06</b> | 1.79        | 0.073           | 0.122           |
| left rostral middle frontal volume            | <b>0.46</b> | <b>2.40e-05</b> | <b>8.00e-05</b> | <b>0.56</b> | <b>1.50e-07</b> | <b>7.07e-07</b> | 1.18        | 0.240           | 0.337           |
| left superior frontal volume                  | <b>0.36</b> | <b>0.001</b>    | <b>0.003</b>    | <b>0.69</b> | <b>1.90e-11</b> | <b>1.46e-10</b> | <b>4.11</b> | <b>3.93e-05</b> | <b>1.24e-04</b> |
| left superior parietal volume                 | <b>0.46</b> | <b>2.27e-05</b> | <b>7.58e-05</b> | <b>0.62</b> | <b>3.38e-09</b> | <b>1.95e-08</b> | 1.38        | 0.166           | 0.246           |
| left superior temporal volume                 | 0.19        | 0.055           | 0.094           | <b>0.80</b> | <b>5.70e-17</b> | <b>9.85e-16</b> | <b>6.15</b> | <b>7.76e-10</b> | <b>4.83e-09</b> |
| left supramarginal volume                     | <b>0.38</b> | <b>5.15e-04</b> | <b>0.001</b>    | <b>0.69</b> | <b>2.04e-11</b> | <b>1.54e-10</b> | <b>3.10</b> | <b>0.002</b>    | <b>0.005</b>    |
| left frontal pole volume                      | -0.04       | 0.624           | 0.718           | -0.10       | 0.808           | 0.876           | -0.45       | 0.652           | 0.745           |
| left temporal pole volume                     | -0.07       | 0.707           | 0.792           | 0.07        | 0.282           | 0.384           | 0.72        | 0.469           | 0.579           |

|                                                |             |                 |                 |             |                 |                 |             |                 |                 |
|------------------------------------------------|-------------|-----------------|-----------------|-------------|-----------------|-----------------|-------------|-----------------|-----------------|
| left transverse temporal volume                | 0.08        | 0.243           | 0.340           | <b>0.68</b> | <b>3.37e-11</b> | <b>2.43e-10</b> | <b>4.44</b> | <b>9.08e-06</b> | <b>3.26e-05</b> |
| left insula volume                             | <b>0.41</b> | <b>1.80e-04</b> | <b>5.12e-04</b> | <b>0.73</b> | <b>3.20e-13</b> | <b>3.09e-12</b> | <b>3.31</b> | <b>9.27e-04</b> | <b>0.002</b>    |
| right banks of superior temporal sulcus volume | <b>0.39</b> | <b>3.36e-04</b> | <b>9.07e-04</b> | <b>0.60</b> | <b>2.11e-08</b> | <b>1.11e-07</b> | 1.78        | 0.075           | 0.124           |
| right caudal anterior cingulate volume         | <b>0.58</b> | <b>6.08e-08</b> | <b>2.99e-07</b> | <b>0.71</b> | <b>2.04e-12</b> | <b>1.77e-11</b> | 1.75        | 0.080           | 0.131           |
| right caudal middle frontal volume             | <b>0.40</b> | <b>3.11e-04</b> | <b>8.47e-04</b> | <b>0.53</b> | <b>8.58e-07</b> | <b>3.65e-06</b> | 1.28        | 0.200           | 0.288           |
| right cuneus volume                            | 0.16        | 0.093           | 0.150           | <b>0.51</b> | <b>3.26e-06</b> | <b>1.25e-05</b> | <b>2.79</b> | <b>0.005</b>    | <b>0.011</b>    |
| right entorhinal volume                        | -0.21       | 0.961           | 0.982           | 0.18        | 0.067           | 0.113           | <b>2.41</b> | <b>0.016</b>    | <b>0.031</b>    |
| right fusiform volume                          | <b>0.31</b> | <b>0.005</b>    | <b>0.011</b>    | <b>0.71</b> | <b>2.11e-12</b> | <b>1.83e-11</b> | <b>3.58</b> | <b>3.47e-04</b> | <b>9.35e-04</b> |
| right inferior parietal volume                 | <b>0.42</b> | <b>1.33e-04</b> | <b>3.85e-04</b> | <b>0.69</b> | <b>1.57e-11</b> | <b>1.23e-10</b> | <b>3.20</b> | <b>0.001</b>    | <b>0.003</b>    |
| right inferior temporal volume                 | <b>0.47</b> | <b>1.43e-05</b> | <b>4.92e-05</b> | <b>0.76</b> | <b>5.40e-15</b> | <b>6.57e-14</b> | <b>3.26</b> | <b>0.001</b>    | <b>0.003</b>    |
| right isthmus cingulate volume                 | 0.18        | 0.072           | 0.120           | <b>0.69</b> | <b>1.35e-11</b> | <b>1.06e-10</b> | <b>4.40</b> | <b>1.08e-05</b> | <b>3.80e-05</b> |
| right lateral occipital volume                 | <b>0.56</b> | <b>1.46e-07</b> | <b>6.91e-07</b> | <b>0.59</b> | <b>2.82e-08</b> | <b>1.46e-07</b> | 0.29        | 0.768           | 0.846           |
| right lateral orbitofrontal volume             | <b>0.49</b> | <b>9.01e-06</b> | <b>3.24e-05</b> | <b>0.60</b> | <b>1.80e-08</b> | <b>9.56e-08</b> | 1.15        | 0.251           | 0.350           |
| right lingual volume                           | 0.04        | 0.381           | 0.492           | <b>0.64</b> | <b>8.36e-10</b> | <b>5.19e-09</b> | <b>5.25</b> | <b>1.49e-07</b> | <b>7.03e-07</b> |
| right medial orbitofrontal volume              | <b>0.27</b> | <b>0.010</b>    | <b>0.021</b>    | <b>0.31</b> | <b>0.005</b>    | <b>0.010</b>    | 0.24        | 0.809           | 0.877           |
| right middle temporal volume                   | <b>0.38</b> | <b>5.09e-04</b> | <b>0.001</b>    | <b>0.68</b> | <b>3.21e-11</b> | <b>2.34e-10</b> | <b>3.13</b> | <b>0.002</b>    | <b>0.004</b>    |
| right parahippocampal volume                   | 0.09        | 0.233           | 0.329           | 0.03        | 0.393           | 0.504           | -0.33       | 0.741           | 0.822           |
| right paracentral volume                       | <b>0.45</b> | <b>3.43e-05</b> | <b>1.10e-04</b> | <b>0.54</b> | <b>6.99e-07</b> | <b>3.01e-06</b> | 0.80        | 0.423           | 0.535           |
| right pars triangularis volume                 | <b>0.43</b> | <b>8.39e-05</b> | <b>2.50e-04</b> | <b>0.61</b> | <b>1.12e-08</b> | <b>6.07e-08</b> | 1.89        | 0.059           | 0.100           |
| right pars opercularis volume                  | <b>0.48</b> | <b>1.40e-05</b> | <b>4.80e-05</b> | <b>0.55</b> | <b>3.09e-07</b> | <b>1.38e-06</b> | 0.74        | 0.459           | 0.569           |
| right pars orbitalis volume                    | <b>0.36</b> | <b>0.001</b>    | <b>0.003</b>    | <b>0.59</b> | <b>3.77e-08</b> | <b>1.90e-07</b> | <b>2.38</b> | <b>0.017</b>    | <b>0.033</b>    |
| right pericalcarine volume                     | <b>0.32</b> | <b>0.003</b>    | <b>0.007</b>    | <b>0.61</b> | <b>6.49e-09</b> | <b>3.61e-08</b> | <b>2.73</b> | <b>0.006</b>    | <b>0.014</b>    |
| right postcentral volume                       | <b>0.48</b> | <b>9.43e-06</b> | <b>3.37e-05</b> | <b>0.67</b> | <b>5.49e-11</b> | <b>3.89e-10</b> | <b>2.26</b> | <b>0.024</b>    | <b>0.045</b>    |
| right posterior cingulate volume               | <b>0.37</b> | <b>8.09e-04</b> | <b>0.002</b>    | <b>0.67</b> | <b>8.77e-11</b> | <b>6.14e-10</b> | <b>3.29</b> | <b>0.001</b>    | <b>0.002</b>    |
| right precentral volume                        | <b>0.48</b> | <b>1.06e-05</b> | <b>3.74e-05</b> | <b>0.57</b> | <b>7.96e-08</b> | <b>3.87e-07</b> | 1.04        | 0.299           | 0.402           |
| right precuneus volume                         | <b>0.31</b> | <b>0.004</b>    | <b>0.010</b>    | <b>0.66</b> | <b>2.65e-10</b> | <b>1.73e-09</b> | <b>3.16</b> | <b>0.002</b>    | <b>0.004</b>    |
| right rostral anterior cingulate volume        | <b>0.40</b> | <b>2.69e-04</b> | <b>7.42e-04</b> | <b>0.69</b> | <b>1.10e-11</b> | <b>8.75e-11</b> | <b>3.00</b> | <b>0.003</b>    | <b>0.006</b>    |
| right rostral middle frontal volume            | <b>0.26</b> | <b>0.015</b>    | <b>0.030</b>    | <b>0.50</b> | <b>5.66e-06</b> | <b>2.11e-05</b> | <b>2.58</b> | <b>0.010</b>    | <b>0.020</b>    |
| right superior frontal volume                  | <b>0.43</b> | <b>8.13e-05</b> | <b>2.44e-04</b> | <b>0.60</b> | <b>1.26e-08</b> | <b>6.74e-08</b> | 2.11        | 0.035           | 0.062           |
| right superior parietal volume                 | <b>0.25</b> | <b>0.017</b>    | <b>0.033</b>    | <b>0.53</b> | <b>8.90e-07</b> | <b>3.78e-06</b> | <b>2.36</b> | <b>0.018</b>    | <b>0.035</b>    |
| right superior temporal volume                 | <b>0.53</b> | <b>1.04e-06</b> | <b>4.37e-06</b> | <b>0.78</b> | <b>2.76e-16</b> | <b>4.29e-15</b> | <b>3.45</b> | <b>5.68e-04</b> | <b>0.001</b>    |
| right supramarginal volume                     | <b>0.34</b> | <b>0.002</b>    | <b>0.004</b>    | <b>0.71</b> | <b>1.85e-12</b> | <b>1.62e-11</b> | <b>4.20</b> | <b>2.62e-05</b> | <b>8.66e-05</b> |
| right frontal pole volume                      | 0.03        | 0.396           | 0.506           | -0.05       | 0.666           | 0.757           | -0.52       | 0.606           | 0.701           |
| right temporal pole volume                     | 0.08        | 0.242           | 0.340           | 0.08        | 0.262           | 0.362           | -0.04       | 0.965           | 0.985           |



|                                                 |             |                 |                 |             |                 |                 |             |                 |                 |
|-------------------------------------------------|-------------|-----------------|-----------------|-------------|-----------------|-----------------|-------------|-----------------|-----------------|
| right transverse temporal volume                | 0.23        | 0.027           | 0.050           | <b>0.51</b> | <b>2.65e-06</b> | <b>1.04e-05</b> | <b>2.31</b> | <b>0.021</b>    | <b>0.039</b>    |
| right insula volume                             | 0.20        | 0.049           | 0.085           | <b>0.71</b> | <b>2.38e-12</b> | <b>2.05e-11</b> | <b>4.14</b> | <b>3.47e-05</b> | <b>1.11e-04</b> |
| left lateral ventricle subcortical volume       | <b>0.95</b> | <b>2.89e-36</b> | <b>7.86e-34</b> | <b>0.97</b> | <b>5.38e-43</b> | <b>3.90e-40</b> | <b>2.34</b> | <b>0.019</b>    | <b>0.037</b>    |
| left inf lat vent subcortical volume            | <b>0.53</b> | <b>9.80e-07</b> | <b>4.14e-06</b> | <b>0.52</b> | <b>1.82e-06</b> | <b>7.26e-06</b> | -0.11       | 0.915           | 0.953           |
| left cerebellum white matter subcortical volume | <b>0.44</b> | <b>6.51e-05</b> | <b>1.99e-04</b> | <b>0.39</b> | <b>4.40e-04</b> | <b>0.001</b>    | -0.39       | 0.699           | 0.785           |
| left cerebellum cortex subcortical volume       | <b>0.73</b> | <b>2.57e-13</b> | <b>2.51e-12</b> | <b>0.86</b> | <b>3.24e-22</b> | <b>1.76e-20</b> | <b>2.95</b> | <b>0.003</b>    | <b>0.007</b>    |
| left thalamus proper subcortical volume         | <b>0.39</b> | <b>4.05e-04</b> | <b>0.001</b>    | <b>0.78</b> | <b>4.59e-16</b> | <b>6.84e-15</b> | <b>3.90</b> | <b>9.50e-05</b> | <b>2.80e-04</b> |
| left caudate subcortical volume                 | <b>0.47</b> | <b>1.52e-05</b> | <b>5.19e-05</b> | <b>0.70</b> | <b>8.54e-12</b> | <b>6.94e-11</b> | <b>2.90</b> | <b>0.004</b>    | <b>0.008</b>    |
| left putamen subcortical volume                 | <b>0.38</b> | <b>5.65e-04</b> | <b>0.001</b>    | <b>0.56</b> | <b>1.82e-07</b> | <b>8.46e-07</b> | 1.88        | 0.060           | 0.102           |
| left pallidum subcortical volume                | <b>0.26</b> | <b>0.016</b>    | <b>0.030</b>    | <b>0.51</b> | <b>2.91e-06</b> | <b>1.13e-05</b> | 1.99        | 0.047           | 0.081           |
| 3rd ventricle subcortical volume                | <b>0.69</b> | <b>2.00e-11</b> | <b>1.53e-10</b> | <b>0.90</b> | <b>1.59e-26</b> | <b>1.73e-24</b> | <b>4.64</b> | <b>3.51e-06</b> | <b>1.35e-05</b> |
| 4th ventricle subcortical volume                | <b>0.60</b> | <b>1.65e-08</b> | <b>8.77e-08</b> | <b>0.85</b> | <b>4.68e-21</b> | <b>2.00e-19</b> | <b>3.95</b> | <b>7.89e-05</b> | <b>2.37e-04</b> |
| brain stem subcortical volume                   | <b>0.78</b> | <b>2.74e-16</b> | <b>4.29e-15</b> | <b>0.88</b> | <b>5.19e-24</b> | <b>3.90e-22</b> | <b>2.49</b> | <b>0.013</b>    | <b>0.026</b>    |
| left hippocampus subcortical volume             | 0.17        | 0.073           | 0.121           | <b>0.46</b> | <b>2.59e-05</b> | <b>8.59e-05</b> | 1.98        | 0.047           | 0.082           |
| left amygdala subcortical volume                | <b>0.27</b> | <b>0.011</b>    | <b>0.023</b>    | <b>0.46</b> | <b>3.03e-05</b> | <b>9.89e-05</b> | 1.52        | 0.128           | 0.198           |
| csf subcortical volume                          | <b>0.24</b> | <b>0.020</b>    | <b>0.038</b>    | <b>0.65</b> | <b>4.88e-10</b> | <b>3.08e-09</b> | <b>4.17</b> | <b>3.04e-05</b> | <b>9.90e-05</b> |
| left accumbens area subcortical volume          | 7.6e-03     | 0.475           | 0.584           | <b>0.24</b> | <b>0.022</b>    | <b>0.041</b>    | 1.39        | 0.165           | 0.245           |
| left ventral diencephalon subcortical volume    | <b>0.48</b> | <b>1.26e-05</b> | <b>4.35e-05</b> | <b>0.68</b> | <b>2.66e-11</b> | <b>1.95e-10</b> | 2.20        | 0.028           | 0.051           |
| left vessel subcortical volume                  | 8.6e-03     | 0.472           | 0.581           | 0.20        | 0.046           | 0.081           | 1.08        | 0.279           | 0.381           |
| left choroid plexus subcortical volume          | <b>0.39</b> | <b>3.28e-04</b> | <b>8.89e-04</b> | <b>0.60</b> | <b>1.95e-08</b> | <b>1.03e-07</b> | <b>2.78</b> | <b>0.005</b>    | <b>0.012</b>    |
| right lateral ventricle subcortical volume      | <b>0.92</b> | <b>1.53e-29</b> | <b>2.79e-27</b> | <b>0.96</b> | <b>1.34e-38</b> | <b>5.83e-36</b> | <b>2.62</b> | <b>0.009</b>    | <b>0.018</b>    |
| right inf lat vent subcortical volume           | <b>0.45</b> | <b>4.81e-05</b> | <b>1.50e-04</b> | <b>0.47</b> | <b>1.90e-05</b> | <b>6.42e-05</b> | 0.17        | 0.867           | 0.915           |
| cerebellum white matter subcortical volume      | <b>0.62</b> | <b>4.73e-09</b> | <b>2.67e-08</b> | <b>0.52</b> | <b>1.54e-06</b> | <b>6.27e-06</b> | -0.99       | 0.321           | 0.425           |
| cerebellum cortex subcortical volume            | <b>0.68</b> | <b>2.26e-11</b> | <b>1.67e-10</b> | <b>0.84</b> | <b>6.18e-20</b> | <b>1.89e-18</b> | <b>2.72</b> | <b>0.006</b>    | <b>0.014</b>    |
| right thalamus proper subcortical volume        | <b>0.29</b> | <b>0.006</b>    | <b>0.014</b>    | <b>0.71</b> | <b>1.35e-12</b> | <b>1.21e-11</b> | <b>3.93</b> | <b>8.39e-05</b> | <b>2.50e-04</b> |
| right caudate subcortical volume                | 0.19        | 0.052           | 0.089           | <b>0.48</b> | <b>1.04e-05</b> | <b>3.69e-05</b> | <b>2.61</b> | <b>0.009</b>    | <b>0.018</b>    |
| right putamen subcortical volume                | <b>0.29</b> | <b>0.007</b>    | <b>0.014</b>    | <b>0.70</b> | <b>5.13e-12</b> | <b>4.30e-11</b> | <b>3.55</b> | <b>3.90e-04</b> | <b>0.001</b>    |
| right pallidum subcortical volume               | <b>0.24</b> | <b>0.022</b>    | <b>0.041</b>    | <b>0.62</b> | <b>5.15e-09</b> | <b>2.88e-08</b> | <b>2.87</b> | <b>0.004</b>    | <b>0.009</b>    |
| right hippocampus subcortical volume            | 0.14        | 0.117           | 0.184           | <b>0.55</b> | <b>2.79e-07</b> | <b>1.26e-06</b> | <b>3.12</b> | <b>0.002</b>    | <b>0.004</b>    |
| right amygdala subcortical volume               | 0.19        | 0.052           | 0.089           | <b>0.58</b> | <b>4.45e-08</b> | <b>2.22e-07</b> | <b>3.27</b> | <b>0.001</b>    | <b>0.003</b>    |
| right accumbens area subcortical volume         | 0.17        | 0.079           | 0.131           | <b>0.40</b> | <b>2.50e-04</b> | <b>6.95e-04</b> | 1.50        | 0.134           | 0.205           |
| right ventral diencephalon subcortical volume   | <b>0.58</b> | <b>5.45e-08</b> | <b>2.70e-07</b> | <b>0.76</b> | <b>6.17e-15</b> | <b>7.42e-14</b> | <b>2.42</b> | <b>0.015</b>    | <b>0.030</b>    |
| right vessel subcortical volume                 | -7.9e-03    | 0.526           | 0.628           | 0.02        | 0.432           | 0.544           | 0.17        | 0.865           | 0.915           |
| right choroid plexus subcortical volume         | <b>0.41</b> | <b>1.61e-04</b> | <b>4.63e-04</b> | <b>0.48</b> | <b>9.72e-06</b> | <b>3.46e-05</b> | 0.72        | 0.470           | 0.579           |
| optic chiasm subcortical volume                 | 0.02        | 0.446           | 0.558           | 0.20        | 0.045           | 0.078           | 1.10        | 0.270           | 0.371           |

|                                                  |             |                 |                 |             |                 |                 |             |                 |                 |
|--------------------------------------------------|-------------|-----------------|-----------------|-------------|-----------------|-----------------|-------------|-----------------|-----------------|
| corpus callosum posterior subcortical volume     | <b>0.34</b> | <b>0.002</b>    | <b>0.004</b>    | <b>0.75</b> | <b>2.91e-14</b> | <b>3.26e-13</b> | <b>4.15</b> | <b>3.34e-05</b> | <b>1.07e-04</b> |
| corpus callosum mid posterior subcortical volume | 0.13        | 0.133           | 0.205           | <b>0.52</b> | <b>1.33e-06</b> | <b>5.48e-06</b> | <b>3.14</b> | <b>0.002</b>    | <b>0.004</b>    |
| corpus callosum central subcortical volume       | <b>0.29</b> | <b>0.007</b>    | <b>0.014</b>    | <b>0.42</b> | <b>1.31e-04</b> | <b>3.80e-04</b> | 1.01        | 0.313           | 0.417           |
| corpus callosum mid anterior subcortical volume  | <b>0.33</b> | <b>0.002</b>    | <b>0.005</b>    | <b>0.45</b> | <b>3.79e-05</b> | <b>1.20e-04</b> | 1.08        | 0.279           | 0.381           |
| corpus callosum anterior subcortical volume      | <b>0.43</b> | <b>9.05e-05</b> | <b>2.67e-04</b> | <b>0.82</b> | <b>9.41e-19</b> | <b>2.30e-17</b> | <b>4.66</b> | <b>3.09e-06</b> | <b>1.19e-05</b> |

**STable 4.** Pearson correlations of regional measurements from standard axial versus standard multi-orientation 64mT scans with 3T scans. Differences between correlation strengths were tested using Steiger's Z. A positive Z-value indicates that multi-orientation regions were more strongly correlated to 3T scans than axial-only regions. Analyses that are statistically significant after correction for multiple comparisons are in bold.

| Measurement                                      | Standard Axial 64mT Correlations with 3T |              |              | Standard Multi-Orientation 64mT Correlations with 3T |                 |              | Steiger      |              |              |
|--------------------------------------------------|------------------------------------------|--------------|--------------|------------------------------------------------------|-----------------|--------------|--------------|--------------|--------------|
|                                                  | <i>r</i>                                 | <i>p</i>     | <i>q</i>     | <i>r</i>                                             | <i>p</i>        | <i>q</i>     | <i>z</i>     | <i>p</i>     | <i>q</i>     |
| left banks of superior temporal sulcus thickness | <b>-0.32</b>                             | <b>0.007</b> | <b>0.015</b> | -0.25                                                | 0.037           | 0.066        | 0.55         | 0.581        | 0.668        |
| left caudal anterior cingulate thickness         | 0.01                                     | 0.914        | 0.939        | -0.10                                                | 0.404           | 0.503        | -0.83        | 0.407        | 0.504        |
| left caudal middle frontal thickness             | 0.20                                     | 0.090        | 0.140        | -0.05                                                | 0.666           | 0.740        | -1.78        | 0.075        | 0.119        |
| left cuneus thickness                            | 0.13                                     | 0.276        | 0.365        | -0.02                                                | 0.878           | 0.913        | -1.08        | 0.281        | 0.370        |
| left entorhinal thickness                        | -0.02                                    | 0.896        | 0.926        | -0.20                                                | 0.096           | 0.148        | -1.09        | 0.276        | 0.365        |
| left fusiform thickness                          | -0.17                                    | 0.168        | 0.239        | -0.21                                                | 0.077           | 0.123        | -0.38        | 0.706        | 0.772        |
| left inferior parietal thickness                 | -0.19                                    | 0.123        | 0.183        | -0.23                                                | 0.055           | 0.091        | -0.39        | 0.694        | 0.763        |
| left inferior temporal thickness                 | 0.09                                     | 0.481        | 0.574        | -0.18                                                | 0.137           | 0.201        | -2.07        | 0.038        | 0.067        |
| left isthmus cingulate thickness                 | -0.03                                    | 0.829        | 0.878        | -0.21                                                | 0.079           | 0.125        | -1.18        | 0.240        | 0.326        |
| left lateral occipital thickness                 | 0.01                                     | 0.929        | 0.949        | -0.01                                                | 0.931           | 0.949        | -0.19        | 0.851        | 0.893        |
| left lateral orbitofrontal thickness             | -0.04                                    | 0.771        | 0.830        | 0.02                                                 | 0.879           | 0.913        | 0.43         | 0.670        | 0.742        |
| left lingual thickness                           | 0.09                                     | 0.449        | 0.542        | -0.15                                                | 0.226           | 0.308        | -1.58        | 0.115        | 0.172        |
| left medial orbitofrontal thickness              | <b>-0.34</b>                             | <b>0.004</b> | <b>0.009</b> | <b>-0.26</b>                                         | <b>0.027</b>    | <b>0.049</b> | 0.64         | 0.525        | 0.618        |
| left middle temporal thickness                   | <b>-0.27</b>                             | <b>0.022</b> | <b>0.041</b> | <b>-0.40</b>                                         | <b>6.11e-04</b> | <b>0.002</b> | -1.16        | 0.248        | 0.335        |
| left parahippocampal thickness                   | 0.03                                     | 0.776        | 0.836        | 0.23                                                 | 0.053           | 0.087        | 1.26         | 0.207        | 0.285        |
| left paracentral thickness                       | 0.06                                     | 0.642        | 0.720        | 0.14                                                 | 0.251           | 0.339        | 0.51         | 0.607        | 0.690        |
| left pars triangularis thickness                 | <b>0.33</b>                              | <b>0.005</b> | <b>0.011</b> | -0.03                                                | 0.785           | 0.843        | <b>-2.32</b> | <b>0.020</b> | <b>0.038</b> |
| left pars opercularis thickness                  | -0.13                                    | 0.298        | 0.389        | -0.10                                                | 0.427           | 0.522        | 0.23         | 0.821        | 0.872        |
| left pars orbitalis thickness                    | -0.21                                    | 0.081        | 0.129        | <b>-0.28</b>                                         | <b>0.021</b>    | <b>0.039</b> | -0.45        | 0.656        | 0.732        |
| left pericalcarine thickness                     | 0.09                                     | 0.447        | 0.542        | 0.03                                                 | 0.824           | 0.873        | -0.46        | 0.646        | 0.723        |
| left postcentral thickness                       | 0.13                                     | 0.299        | 0.390        | 0.14                                                 | 0.241           | 0.328        | 0.09         | 0.926        | 0.948        |
| left posterior cingulate thickness               | -0.18                                    | 0.133        | 0.196        | -0.20                                                | 0.102           | 0.155        | -0.11        | 0.909        | 0.935        |
| left precentral thickness                        | 0.09                                     | 0.484        | 0.577        | 0.09                                                 | 0.472           | 0.566        | 0.01         | 0.990        | 0.992        |
| left precuneus thickness                         | 0.07                                     | 0.550        | 0.642        | -0.03                                                | 0.825           | 0.874        | -0.79        | 0.431        | 0.525        |
| left rostral anterior cingulate thickness        | <b>-0.30</b>                             | <b>0.010</b> | <b>0.021</b> | -0.19                                                | 0.118           | 0.177        | 0.88         | 0.378        | 0.477        |
| left rostral middle frontal thickness            | -0.01                                    | 0.915        | 0.939        | <b>-0.29</b>                                         | <b>0.014</b>    | <b>0.027</b> | <b>-2.30</b> | <b>0.021</b> | <b>0.040</b> |
| left superior frontal thickness                  | 0.02                                     | 0.843        | 0.888        | -0.07                                                | 0.571           | 0.659        | -0.57        | 0.572        | 0.660        |
| left superior parietal thickness                 | 0.04                                     | 0.722        | 0.787        | -0.03                                                | 0.808           | 0.861        | -0.44        | 0.663        | 0.737        |
| left superior temporal thickness                 | -0.24                                    | 0.049        | 0.082        | -0.26                                                | 0.033           | 0.059        | -0.15        | 0.881        | 0.914        |

|                                                   |              |              |              |              |              |              |              |                 |                 |
|---------------------------------------------------|--------------|--------------|--------------|--------------|--------------|--------------|--------------|-----------------|-----------------|
| left supramarginal thickness                      | 0.02         | 0.859        | 0.898        | <b>-0.36</b> | <b>0.002</b> | <b>0.005</b> | <b>-2.69</b> | <b>0.007</b>    | <b>0.015</b>    |
| left frontal pole thickness                       | -0.23        | 0.058        | 0.095        | -0.10        | 0.434        | 0.528        | 0.92         | 0.356           | 0.454           |
| left temporal pole thickness                      | -0.24        | 0.048        | 0.081        | 0.07         | 0.563        | 0.653        | 1.83         | 0.067           | 0.109           |
| left transverse temporal thickness                | <b>-0.30</b> | <b>0.012</b> | <b>0.023</b> | <b>-0.32</b> | <b>0.008</b> | <b>0.016</b> | -0.12        | 0.907           | 0.933           |
| left insula thickness                             | -0.07        | 0.539        | 0.631        | -0.09        | 0.448        | 0.542        | -0.12        | 0.907           | 0.933           |
| right banks of superior temporal sulcus thickness | -0.13        | 0.290        | 0.381        | -0.21        | 0.087        | 0.137        | -0.52        | 0.600           | 0.684           |
| right caudal anterior cingulate thickness         | -0.16        | 0.174        | 0.247        | <b>-0.32</b> | <b>0.007</b> | <b>0.014</b> | -1.25        | 0.210           | 0.289           |
| right caudal middle frontal thickness             | 0.05         | 0.656        | 0.732        | -0.16        | 0.194        | 0.269        | -1.40        | 0.163           | 0.233           |
| right cuneus thickness                            | 0.10         | 0.428        | 0.523        | -0.03        | 0.802        | 0.856        | -0.85        | 0.394           | 0.492           |
| right entorhinal thickness                        | -0.23        | 0.057        | 0.094        | -0.23        | 0.053        | 0.088        | -0.02        | 0.981           | 0.986           |
| right fusiform thickness                          | -0.21        | 0.088        | 0.137        | -0.19        | 0.111        | 0.168        | 0.10         | 0.921           | 0.944           |
| right inferior parietal thickness                 | -0.21        | 0.077        | 0.123        | -0.16        | 0.188        | 0.262        | 0.58         | 0.561           | 0.651           |
| right inferior temporal thickness                 | -0.14        | 0.256        | 0.344        | -0.19        | 0.124        | 0.184        | -0.35        | 0.727           | 0.792           |
| right isthmus cingulate thickness                 | -0.02        | 0.871        | 0.907        | -0.22        | 0.062        | 0.101        | -1.36        | 0.175           | 0.247           |
| right lateral occipital thickness                 | 0.18         | 0.128        | 0.189        | 0.10         | 0.423        | 0.518        | -0.79        | 0.429           | 0.523           |
| right lateral orbitofrontal thickness             | -0.05        | 0.710        | 0.776        | -0.12        | 0.307        | 0.398        | -0.62        | 0.534           | 0.626           |
| right lingual thickness                           | -0.04        | 0.756        | 0.817        | <b>-0.28</b> | <b>0.019</b> | <b>0.036</b> | -1.72        | 0.086           | 0.135           |
| right medial orbitofrontal thickness              | <b>-0.35</b> | <b>0.003</b> | <b>0.006</b> | -0.26        | 0.029        | 0.052        | 0.80         | 0.425           | 0.520           |
| right middle temporal thickness                   | <b>-0.37</b> | <b>0.002</b> | <b>0.004</b> | <b>-0.33</b> | <b>0.005</b> | <b>0.011</b> | 0.32         | 0.746           | 0.809           |
| right parahippocampal thickness                   | 0.21         | 0.077        | 0.122        | 0.17         | 0.163        | 0.233        | -0.25        | 0.803           | 0.856           |
| right paracentral thickness                       | 0.17         | 0.171        | 0.243        | 0.14         | 0.256        | 0.344        | -0.21        | 0.836           | 0.882           |
| right pars triangularis thickness                 | 0.21         | 0.087        | 0.136        | -0.01        | 0.925        | 0.947        | -1.29        | 0.196           | 0.271           |
| right pars opercularis thickness                  | -0.05        | 0.683        | 0.754        | 0.05         | 0.658        | 0.734        | 0.84         | 0.402           | 0.501           |
| right pars orbitalis thickness                    | 3.2e-03      | 0.979        | 0.986        | -0.14        | 0.263        | 0.351        | -1.05        | 0.296           | 0.387           |
| right pericalcarine thickness                     | -0.03        | 0.808        | 0.861        | -0.09        | 0.443        | 0.537        | -0.40        | 0.692           | 0.761           |
| right postcentral thickness                       | 0.15         | 0.229        | 0.313        | -0.13        | 0.288        | 0.378        | -1.71        | 0.087           | 0.136           |
| right posterior cingulate thickness               | -0.11        | 0.362        | 0.460        | <b>-0.34</b> | <b>0.004</b> | <b>0.008</b> | -1.98        | 0.048           | 0.081           |
| right precentral thickness                        | 0.16         | 0.187        | 0.261        | 5.5e-03      | 0.964        | 0.975        | -1.15        | 0.252           | 0.340           |
| right precuneus thickness                         | 0.07         | 0.539        | 0.631        | -0.14        | 0.251        | 0.339        | -1.71        | 0.087           | 0.136           |
| right rostral anterior cingulate thickness        | <b>-0.37</b> | <b>0.001</b> | <b>0.003</b> | -0.15        | 0.225        | 0.307        | 1.71         | 0.088           | 0.137           |
| right rostral middle frontal thickness            | -0.19        | 0.113        | 0.170        | -0.21        | 0.079        | 0.125        | -0.18        | 0.855           | 0.895           |
| right superior frontal thickness                  | 0.16         | 0.193        | 0.268        | 3.0e-03      | 0.980        | 0.986        | -1.20        | 0.231           | 0.315           |
| right superior parietal thickness                 | 0.12         | 0.314        | 0.405        | 0.18         | 0.134        | 0.196        | 0.48         | 0.633           | 0.712           |
| right superior temporal thickness                 | -0.18        | 0.144        | 0.209        | <b>-0.30</b> | <b>0.012</b> | <b>0.023</b> | -0.91        | 0.364           | 0.463           |
| right supramarginal thickness                     | 0.19         | 0.106        | 0.161        | <b>-0.32</b> | <b>0.006</b> | <b>0.013</b> | <b>-3.57</b> | <b>3.63e-04</b> | <b>9.60e-04</b> |

|                                             |             |                 |                 |             |                 |                 |             |                 |              |
|---------------------------------------------|-------------|-----------------|-----------------|-------------|-----------------|-----------------|-------------|-----------------|--------------|
| right frontal pole thickness                | -0.10       | 0.406           | 0.503           | -0.13       | 0.300           | 0.390           | -0.17       | 0.867           | 0.904        |
| right temporal pole thickness               | 0.17        | 0.168           | 0.239           | -0.15       | 0.226           | 0.308           | -1.88       | 0.060           | 0.098        |
| right transverse temporal thickness         | -0.03       | 0.814           | 0.866           | -0.26       | 0.031           | 0.056           | -1.58       | 0.115           | 0.172        |
| right insula thickness                      | -0.07       | 0.589           | 0.674           | -0.06       | 0.595           | 0.679           | 6.9e-03     | 0.995           | 0.996        |
| left banks of superior temporal sulcus area | <b>0.34</b> | <b>0.003</b>    | <b>0.008</b>    | <b>0.59</b> | <b>6.05e-08</b> | <b>2.90e-07</b> | <b>2.25</b> | <b>0.025</b>    | <b>0.045</b> |
| left caudal anterior cingulate area         | <b>0.35</b> | <b>0.003</b>    | <b>0.007</b>    | 0.22        | 0.066           | 0.107           | -1.61       | 0.108           | 0.163        |
| left caudal middle frontal area             | <b>0.31</b> | <b>0.009</b>    | <b>0.018</b>    | <b>0.46</b> | <b>5.69e-05</b> | <b>1.70e-04</b> | 1.27        | 0.205           | 0.284        |
| left cuneus area                            | <b>0.41</b> | <b>4.66e-04</b> | <b>0.001</b>    | <b>0.45</b> | <b>1.05e-04</b> | <b>3.05e-04</b> | 0.28        | 0.780           | 0.839        |
| left entorhinal area                        | -0.06       | 0.607           | 0.690           | 0.06        | 0.641           | 0.718           | 0.72        | 0.470           | 0.565        |
| left fusiform area                          | <b>0.31</b> | <b>0.009</b>    | <b>0.018</b>    | <b>0.39</b> | <b>8.89e-04</b> | <b>0.002</b>    | 0.60        | 0.550           | 0.641        |
| left inferior parietal area                 | <b>0.59</b> | <b>1.04e-07</b> | <b>4.85e-07</b> | <b>0.69</b> | <b>2.58e-11</b> | <b>1.86e-10</b> | 1.36        | 0.175           | 0.247        |
| left inferior temporal area                 | <b>0.43</b> | <b>1.98e-04</b> | <b>5.47e-04</b> | <b>0.59</b> | <b>1.04e-07</b> | <b>4.84e-07</b> | 1.56        | 0.119           | 0.177        |
| left isthmus cingulate area                 | <b>0.34</b> | <b>0.004</b>    | <b>0.009</b>    | 0.18        | 0.146           | 0.212           | -1.10       | 0.270           | 0.359        |
| left lateral occipital area                 | <b>0.33</b> | <b>0.005</b>    | <b>0.011</b>    | <b>0.56</b> | <b>5.99e-07</b> | <b>2.47e-06</b> | 1.68        | 0.093           | 0.144        |
| left lateral orbitofrontal area             | <b>0.51</b> | <b>6.58e-06</b> | <b>2.33e-05</b> | <b>0.65</b> | <b>8.07e-10</b> | <b>4.94e-09</b> | 1.75        | 0.080           | 0.128        |
| left lingual area                           | 0.24        | 0.046           | 0.078           | <b>0.40</b> | <b>5.38e-04</b> | <b>0.001</b>    | 1.05        | 0.296           | 0.387        |
| left medial orbitofrontal area              | <b>0.49</b> | <b>1.68e-05</b> | <b>5.53e-05</b> | <b>0.53</b> | <b>2.45e-06</b> | <b>9.23e-06</b> | 0.42        | 0.678           | 0.748        |
| left middle temporal area                   | <b>0.46</b> | <b>6.52e-05</b> | <b>1.93e-04</b> | <b>0.39</b> | <b>8.63e-04</b> | <b>0.002</b>    | -0.63       | 0.532           | 0.623        |
| left parahippocampal area                   | -0.23       | 0.060           | 0.098           | 0.05        | 0.660           | 0.735           | 1.71        | 0.088           | 0.137        |
| left paracentral area                       | <b>0.34</b> | <b>0.003</b>    | <b>0.008</b>    | <b>0.71</b> | <b>5.36e-12</b> | <b>4.29e-11</b> | <b>3.52</b> | <b>4.26e-04</b> | <b>0.001</b> |
| left pars triangularis area                 | <b>0.40</b> | <b>6.91e-04</b> | <b>0.002</b>    | <b>0.40</b> | <b>5.61e-04</b> | <b>0.001</b>    | 0.06        | 0.954           | 0.967        |
| left pars opercularis area                  | <b>0.45</b> | <b>8.10e-05</b> | <b>2.37e-04</b> | <b>0.45</b> | <b>8.42e-05</b> | <b>2.46e-04</b> | -7.7e-03    | 0.994           | 0.996        |
| left pars orbitalis area                    | <b>0.60</b> | <b>4.50e-08</b> | <b>2.22e-07</b> | <b>0.53</b> | <b>2.36e-06</b> | <b>8.91e-06</b> | -0.70       | 0.484           | 0.578        |
| left pericalcarine area                     | <b>0.33</b> | <b>0.005</b>    | <b>0.011</b>    | <b>0.42</b> | <b>3.43e-04</b> | <b>9.12e-04</b> | 0.63        | 0.530           | 0.622        |
| left postcentral area                       | 0.21        | 0.088           | 0.137           | 0.23        | 0.053           | 0.088           | 0.19        | 0.848           | 0.892        |
| left posterior cingulate area               | <b>0.30</b> | <b>0.011</b>    | <b>0.022</b>    | <b>0.38</b> | <b>0.001</b>    | <b>0.003</b>    | 0.86        | 0.390           | 0.489        |
| left precentral area                        | <b>0.36</b> | <b>0.002</b>    | <b>0.006</b>    | <b>0.46</b> | <b>5.30e-05</b> | <b>1.60e-04</b> | 0.94        | 0.349           | 0.446        |
| left precuneus area                         | <b>0.32</b> | <b>0.007</b>    | <b>0.015</b>    | <b>0.45</b> | <b>1.09e-04</b> | <b>3.16e-04</b> | 0.98        | 0.327           | 0.422        |
| left rostral anterior cingulate area        | <b>0.44</b> | <b>1.35e-04</b> | <b>3.84e-04</b> | <b>0.41</b> | <b>4.25e-04</b> | <b>0.001</b>    | -0.32       | 0.753           | 0.815        |
| left rostral middle frontal area            | <b>0.61</b> | <b>2.61e-08</b> | <b>1.31e-07</b> | <b>0.65</b> | <b>7.92e-10</b> | <b>4.88e-09</b> | 0.63        | 0.526           | 0.618        |
| left superior frontal area                  | <b>0.53</b> | <b>1.85e-06</b> | <b>7.08e-06</b> | <b>0.64</b> | <b>1.72e-09</b> | <b>1.01e-08</b> | 1.34        | 0.180           | 0.252        |
| left superior parietal area                 | <b>0.37</b> | <b>0.002</b>    | <b>0.004</b>    | <b>0.50</b> | <b>9.86e-06</b> | <b>3.38e-05</b> | 1.08        | 0.279           | 0.369        |
| left superior temporal area                 | <b>0.29</b> | <b>0.015</b>    | <b>0.029</b>    | <b>0.49</b> | <b>2.00e-05</b> | <b>6.47e-05</b> | 1.65        | 0.099           | 0.152        |
| left supramarginal area                     | <b>0.52</b> | <b>3.70e-06</b> | <b>1.36e-05</b> | <b>0.50</b> | <b>1.25e-05</b> | <b>4.21e-05</b> | -0.26       | 0.797           | 0.851        |

|                                              |             |                 |                 |             |                 |                 |              |              |              |
|----------------------------------------------|-------------|-----------------|-----------------|-------------|-----------------|-----------------|--------------|--------------|--------------|
| left frontal pole area                       | 0.25        | 0.038           | 0.066           | 0.12        | 0.304           | 0.394           | -0.76        | 0.448        | 0.542        |
| left temporal pole area                      | -0.10       | 0.428           | 0.523           | 0.10        | 0.397           | 0.495           | 1.11         | 0.267        | 0.356        |
| left transverse temporal area                | 0.16        | 0.192           | 0.267           | <b>0.46</b> | <b>7.44e-05</b> | <b>2.19e-04</b> | 2.15         | 0.032        | 0.056        |
| left insula area                             | <b>0.28</b> | <b>0.018</b>    | <b>0.033</b>    | <b>0.27</b> | <b>0.022</b>    | <b>0.041</b>    | -0.09        | 0.929        | 0.949        |
| right banks of superior temporal sulcus area | <b>0.41</b> | <b>3.90e-04</b> | <b>0.001</b>    | <b>0.32</b> | <b>0.006</b>    | <b>0.013</b>    | -0.79        | 0.427        | 0.522        |
| right caudal anterior cingulate area         | <b>0.62</b> | <b>9.78e-09</b> | <b>5.24e-08</b> | <b>0.70</b> | <b>1.57e-11</b> | <b>1.19e-10</b> | 1.27         | 0.202        | 0.279        |
| right caudal middle frontal area             | <b>0.44</b> | <b>1.14e-04</b> | <b>3.28e-04</b> | <b>0.51</b> | <b>6.09e-06</b> | <b>2.17e-05</b> | 0.64         | 0.519        | 0.613        |
| right cuneus area                            | 0.18        | 0.141           | 0.206           | <b>0.33</b> | <b>0.005</b>    | <b>0.011</b>    | 1.16         | 0.247        | 0.335        |
| right entorhinal area                        | -0.16       | 0.183           | 0.257           | 0.14        | 0.265           | 0.353           | 2.07         | 0.039        | 0.068        |
| right fusiform area                          | <b>0.44</b> | <b>1.17e-04</b> | <b>3.36e-04</b> | <b>0.61</b> | <b>2.00e-08</b> | <b>1.02e-07</b> | 1.52         | 0.129        | 0.190        |
| right inferior parietal area                 | <b>0.53</b> | <b>2.26e-06</b> | <b>8.58e-06</b> | <b>0.58</b> | <b>1.33e-07</b> | <b>6.06e-07</b> | 0.58         | 0.564        | 0.654        |
| right inferior temporal area                 | <b>0.55</b> | <b>8.35e-07</b> | <b>3.39e-06</b> | <b>0.60</b> | <b>3.37e-08</b> | <b>1.68e-07</b> | 0.63         | 0.532        | 0.623        |
| right isthmus cingulate area                 | 0.19        | 0.122           | 0.181           | <b>0.31</b> | <b>0.008</b>    | <b>0.017</b>    | 1.10         | 0.272        | 0.361        |
| right lateral occipital area                 | <b>0.54</b> | <b>1.44e-06</b> | <b>5.62e-06</b> | <b>0.69</b> | <b>2.48e-11</b> | <b>1.80e-10</b> | 1.68         | 0.093        | 0.144        |
| right lateral orbitofrontal area             | <b>0.51</b> | <b>7.31e-06</b> | <b>2.56e-05</b> | <b>0.55</b> | <b>8.48e-07</b> | <b>3.44e-06</b> | 0.40         | 0.690        | 0.760        |
| right lingual area                           | 0.10        | 0.409           | 0.505           | <b>0.49</b> | <b>1.96e-05</b> | <b>6.34e-05</b> | <b>2.99</b>  | <b>0.003</b> | <b>0.006</b> |
| right medial orbitofrontal area              | <b>0.43</b> | <b>2.03e-04</b> | <b>5.58e-04</b> | <b>0.42</b> | <b>3.06e-04</b> | <b>8.22e-04</b> | -0.10        | 0.921        | 0.944        |
| right middle temporal area                   | <b>0.45</b> | <b>9.29e-05</b> | <b>2.69e-04</b> | 0.22        | 0.072           | 0.116           | <b>-2.26</b> | <b>0.024</b> | <b>0.044</b> |
| right parahippocampal area                   | 0.03        | 0.814           | 0.866           | 0.16        | 0.190           | 0.265           | 0.82         | 0.409        | 0.506        |
| right paracentral area                       | <b>0.36</b> | <b>0.002</b>    | <b>0.005</b>    | <b>0.49</b> | <b>2.08e-05</b> | <b>6.70e-05</b> | 1.17         | 0.244        | 0.331        |
| right pars triangularis area                 | <b>0.42</b> | <b>3.09e-04</b> | <b>8.29e-04</b> | <b>0.55</b> | <b>9.97e-07</b> | <b>4.00e-06</b> | 1.41         | 0.159        | 0.229        |
| right pars opercularis area                  | <b>0.48</b> | <b>2.23e-05</b> | <b>7.13e-05</b> | <b>0.39</b> | <b>9.43e-04</b> | <b>0.002</b>    | -0.83        | 0.406        | 0.503        |
| right pars orbitalis area                    | <b>0.37</b> | <b>0.001</b>    | <b>0.003</b>    | <b>0.52</b> | <b>3.86e-06</b> | <b>1.42e-05</b> | 1.42         | 0.156        | 0.225        |
| right pericalcarine area                     | <b>0.44</b> | <b>1.53e-04</b> | <b>4.31e-04</b> | <b>0.28</b> | <b>0.018</b>    | <b>0.033</b>    | -1.45        | 0.146        | 0.212        |
| right postcentral area                       | <b>0.44</b> | <b>1.27e-04</b> | <b>3.64e-04</b> | <b>0.46</b> | <b>5.85e-05</b> | <b>1.74e-04</b> | 0.20         | 0.838        | 0.885        |
| right posterior cingulate area               | <b>0.32</b> | <b>0.007</b>    | <b>0.014</b>    | <b>0.36</b> | <b>0.002</b>    | <b>0.005</b>    | 0.48         | 0.634        | 0.713        |
| right precentral area                        | <b>0.48</b> | <b>2.62e-05</b> | <b>8.27e-05</b> | <b>0.48</b> | <b>2.24e-05</b> | <b>7.17e-05</b> | 0.04         | 0.970        | 0.978        |
| right precuneus area                         | <b>0.43</b> | <b>1.77e-04</b> | <b>4.92e-04</b> | <b>0.44</b> | <b>1.33e-04</b> | <b>3.80e-04</b> | 0.06         | 0.951        | 0.965        |
| right rostral anterior cingulate area        | <b>0.57</b> | <b>2.66e-07</b> | <b>1.17e-06</b> | <b>0.60</b> | <b>4.84e-08</b> | <b>2.37e-07</b> | 0.39         | 0.694        | 0.763        |
| right rostral middle frontal area            | <b>0.49</b> | <b>1.97e-05</b> | <b>6.38e-05</b> | <b>0.57</b> | <b>2.56e-07</b> | <b>1.13e-06</b> | 0.92         | 0.356        | 0.454        |
| right superior frontal area                  | <b>0.56</b> | <b>4.54e-07</b> | <b>1.92e-06</b> | <b>0.69</b> | <b>5.19e-11</b> | <b>3.58e-10</b> | 1.74         | 0.083        | 0.131        |
| right superior parietal area                 | 0.22        | 0.062           | 0.102           | 0.25        | 0.038           | 0.067           | 0.18         | 0.855        | 0.895        |
| right superior temporal area                 | <b>0.50</b> | <b>8.61e-06</b> | <b>2.98e-05</b> | <b>0.36</b> | <b>0.002</b>    | <b>0.005</b>    | -1.20        | 0.230        | 0.314        |
| right supramarginal area                     | <b>0.28</b> | <b>0.021</b>    | <b>0.039</b>    | <b>0.28</b> | <b>0.018</b>    | <b>0.034</b>    | 0.06         | 0.955        | 0.967        |
| right frontal pole area                      | <b>0.26</b> | <b>0.027</b>    | <b>0.049</b>    | 0.20        | 0.102           | 0.156           | -0.52        | 0.602        | 0.686        |

|                                               |             |                 |                 |             |                 |                 |             |              |              |
|-----------------------------------------------|-------------|-----------------|-----------------|-------------|-----------------|-----------------|-------------|--------------|--------------|
| right temporal pole area                      | 7.4e-03     | 0.951           | 0.965           | 0.20        | 0.102           | 0.155           | 1.04        | 0.300        | 0.390        |
| right transverse temporal area                | 0.26        | 0.032           | 0.057           | <b>0.48</b> | <b>2.36e-05</b> | <b>7.50e-05</b> | 1.75        | 0.080        | 0.127        |
| right insula area                             | 0.22        | 0.066           | 0.107           | 0.21        | 0.083           | 0.131           | -0.12       | 0.901        | 0.929        |
| left banks of superior temporal sulcus volume | 0.26        | 0.033           | 0.059           | <b>0.54</b> | <b>1.26e-06</b> | <b>4.97e-06</b> | <b>2.65</b> | <b>0.008</b> | <b>0.016</b> |
| left caudal anterior cingulate volume         | <b>0.30</b> | <b>0.011</b>    | <b>0.021</b>    | 0.13        | 0.301           | 0.392           | -2.00       | 0.046        | 0.078        |
| left caudal middle frontal volume             | <b>0.40</b> | <b>6.72e-04</b> | <b>0.002</b>    | <b>0.52</b> | <b>3.15e-06</b> | <b>1.17e-05</b> | 1.06        | 0.289        | 0.380        |
| left cuneus volume                            | <b>0.31</b> | <b>0.010</b>    | <b>0.020</b>    | <b>0.45</b> | <b>8.19e-05</b> | <b>2.39e-04</b> | 1.05        | 0.292        | 0.382        |
| left entorhinal volume                        | -0.10       | 0.405           | 0.503           | 0.04        | 0.756           | 0.817           | 0.83        | 0.407        | 0.504        |
| left fusiform volume                          | <b>0.31</b> | <b>0.009</b>    | <b>0.018</b>    | <b>0.42</b> | <b>2.65e-04</b> | <b>7.20e-04</b> | 0.99        | 0.325        | 0.419        |
| left inferior parietal volume                 | <b>0.57</b> | <b>3.03e-07</b> | <b>1.31e-06</b> | <b>0.64</b> | <b>2.13e-09</b> | <b>1.21e-08</b> | 0.83        | 0.406        | 0.503        |
| left inferior temporal volume                 | <b>0.46</b> | <b>6.67e-05</b> | <b>1.97e-04</b> | <b>0.59</b> | <b>8.32e-08</b> | <b>3.92e-07</b> | 1.31        | 0.191        | 0.266        |
| left isthmus cingulate volume                 | <b>0.31</b> | <b>0.010</b>    | <b>0.020</b>    | 0.16        | 0.179           | 0.252           | -1.04       | 0.299        | 0.389        |
| left lateral occipital volume                 | <b>0.39</b> | <b>7.49e-04</b> | <b>0.002</b>    | <b>0.49</b> | <b>1.88e-05</b> | <b>6.12e-05</b> | 0.72        | 0.471        | 0.565        |
| left lateral orbitofrontal volume             | <b>0.48</b> | <b>2.98e-05</b> | <b>9.31e-05</b> | <b>0.56</b> | <b>4.92e-07</b> | <b>2.06e-06</b> | 0.80        | 0.423        | 0.518        |
| left lingual volume                           | 0.12        | 0.312           | 0.403           | <b>0.44</b> | <b>1.31e-04</b> | <b>3.72e-04</b> | 2.06        | 0.039        | 0.068        |
| left medial orbitofrontal volume              | <b>0.30</b> | <b>0.012</b>    | <b>0.024</b>    | 0.21        | 0.088           | 0.138           | -0.78       | 0.434        | 0.528        |
| left middle temporal volume                   | <b>0.31</b> | <b>0.010</b>    | <b>0.020</b>    | <b>0.38</b> | <b>0.001</b>    | <b>0.003</b>    | 0.62        | 0.536        | 0.627        |
| left parahippocampal volume                   | -0.04       | 0.721           | 0.787           | 0.08        | 0.521           | 0.613           | 0.78        | 0.436        | 0.530        |
| left paracentral volume                       | <b>0.32</b> | <b>0.006</b>    | <b>0.013</b>    | <b>0.55</b> | <b>1.03e-06</b> | <b>4.10e-06</b> | 1.94        | 0.053        | 0.088        |
| left pars triangularis volume                 | <b>0.47</b> | <b>4.51e-05</b> | <b>1.37e-04</b> | <b>0.44</b> | <b>1.52e-04</b> | <b>4.30e-04</b> | -0.34       | 0.733        | 0.798        |
| left pars opercularis volume                  | <b>0.35</b> | <b>0.003</b>    | <b>0.006</b>    | <b>0.46</b> | <b>7.18e-05</b> | <b>2.12e-04</b> | 0.85        | 0.396        | 0.495        |
| left pars orbitalis volume                    | <b>0.54</b> | <b>1.27e-06</b> | <b>4.99e-06</b> | <b>0.59</b> | <b>7.73e-08</b> | <b>3.66e-07</b> | 0.58        | 0.561        | 0.651        |
| left pericalcarine volume                     | <b>0.32</b> | <b>0.007</b>    | <b>0.014</b>    | <b>0.40</b> | <b>7.13e-04</b> | <b>0.002</b>    | 0.51        | 0.610        | 0.692        |
| left postcentral volume                       | 0.23        | 0.053           | 0.088           | <b>0.49</b> | <b>1.74e-05</b> | <b>5.70e-05</b> | 2.04        | 0.042        | 0.072        |
| left posterior cingulate volume               | <b>0.27</b> | <b>0.023</b>    | <b>0.042</b>    | 0.24        | 0.041           | 0.071           | -0.27       | 0.787        | 0.844        |
| left precentral volume                        | <b>0.36</b> | <b>0.002</b>    | <b>0.006</b>    | <b>0.53</b> | <b>3.04e-06</b> | <b>1.14e-05</b> | 1.58        | 0.113        | 0.170        |
| left precuneus volume                         | <b>0.29</b> | <b>0.015</b>    | <b>0.029</b>    | <b>0.44</b> | <b>1.66e-04</b> | <b>4.63e-04</b> | 1.07        | 0.285        | 0.375        |
| left rostral anterior cingulate volume        | <b>0.39</b> | <b>8.49e-04</b> | <b>0.002</b>    | 0.26        | 0.028           | 0.050           | -1.21       | 0.224        | 0.307        |
| left rostral middle frontal volume            | <b>0.51</b> | <b>7.43e-06</b> | <b>2.59e-05</b> | <b>0.41</b> | <b>4.46e-04</b> | <b>0.001</b>    | -1.12       | 0.263        | 0.351        |
| left superior frontal volume                  | <b>0.38</b> | <b>0.001</b>    | <b>0.003</b>    | <b>0.39</b> | <b>9.43e-04</b> | <b>0.002</b>    | 0.09        | 0.925        | 0.947        |
| left superior parietal volume                 | <b>0.47</b> | <b>4.29e-05</b> | <b>1.31e-04</b> | <b>0.65</b> | <b>1.50e-09</b> | <b>8.87e-09</b> | 1.87        | 0.061        | 0.100        |
| left superior temporal volume                 | 0.21        | 0.087           | 0.136           | <b>0.53</b> | <b>2.29e-06</b> | <b>8.68e-06</b> | <b>2.85</b> | <b>0.004</b> | <b>0.010</b> |
| left supramarginal volume                     | <b>0.42</b> | <b>2.70e-04</b> | <b>7.31e-04</b> | <b>0.58</b> | <b>1.10e-07</b> | <b>5.10e-07</b> | 1.88        | 0.059        | 0.098        |
| left frontal pole volume                      | -0.04       | 0.754           | 0.816           | -0.08       | 0.502           | 0.596           | -0.26       | 0.794        | 0.849        |

|                                                |             |                 |                 |             |                 |                 |              |              |              |
|------------------------------------------------|-------------|-----------------|-----------------|-------------|-----------------|-----------------|--------------|--------------|--------------|
| left temporal pole volume                      | -0.08       | 0.495           | 0.589           | 0.10        | 0.397           | 0.495           | 1.04         | 0.299        | 0.389        |
| left transverse temporal volume                | 0.11        | 0.380           | 0.479           | <b>0.35</b> | <b>0.003</b>    | <b>0.006</b>    | 1.85         | 0.064        | 0.105        |
| left insula volume                             | <b>0.42</b> | <b>2.65e-04</b> | <b>7.20e-04</b> | <b>0.55</b> | <b>7.20e-07</b> | <b>2.95e-06</b> | 1.31         | 0.192        | 0.266        |
| right banks of superior temporal sulcus volume | <b>0.43</b> | <b>1.89e-04</b> | <b>5.23e-04</b> | <b>0.43</b> | <b>2.20e-04</b> | <b>6.03e-04</b> | -0.04        | 0.968        | 0.977        |
| right caudal anterior cingulate volume         | <b>0.64</b> | <b>2.45e-09</b> | <b>1.39e-08</b> | <b>0.53</b> | <b>2.17e-06</b> | <b>8.26e-06</b> | -1.51        | 0.131        | 0.192        |
| right caudal middle frontal volume             | <b>0.47</b> | <b>4.19e-05</b> | <b>1.28e-04</b> | <b>0.47</b> | <b>3.35e-05</b> | <b>1.04e-04</b> | 0.05         | 0.962        | 0.974        |
| right cuneus volume                            | 0.16        | 0.179           | 0.252           | <b>0.28</b> | <b>0.018</b>    | <b>0.035</b>    | 0.81         | 0.417        | 0.512        |
| right entorhinal volume                        | -0.24       | 0.042           | 0.072           | 0.06        | 0.610           | 0.692           | 2.19         | 0.028        | 0.051        |
| right fusiform volume                          | <b>0.32</b> | <b>0.007</b>    | <b>0.014</b>    | <b>0.46</b> | <b>5.43e-05</b> | <b>1.63e-04</b> | 1.12         | 0.263        | 0.351        |
| right inferior parietal volume                 | <b>0.48</b> | <b>2.84e-05</b> | <b>8.93e-05</b> | <b>0.58</b> | <b>1.78e-07</b> | <b>7.99e-07</b> | 1.11         | 0.266        | 0.355        |
| right inferior temporal volume                 | <b>0.53</b> | <b>2.75e-06</b> | <b>1.03e-05</b> | <b>0.58</b> | <b>1.65e-07</b> | <b>7.44e-07</b> | 0.51         | 0.613        | 0.694        |
| right isthmus cingulate volume                 | 0.19        | 0.112           | 0.169           | 0.22        | 0.072           | 0.116           | 0.21         | 0.831        | 0.879        |
| right lateral occipital volume                 | <b>0.57</b> | <b>3.13e-07</b> | <b>1.36e-06</b> | <b>0.65</b> | <b>1.14e-09</b> | <b>6.80e-09</b> | 0.93         | 0.350        | 0.447        |
| right lateral orbitofrontal volume             | <b>0.49</b> | <b>1.86e-05</b> | <b>6.06e-05</b> | <b>0.30</b> | <b>0.013</b>    | <b>0.024</b>    | -1.51        | 0.131        | 0.192        |
| right lingual volume                           | 0.04        | 0.753           | 0.815           | <b>0.39</b> | <b>8.34e-04</b> | <b>0.002</b>    | <b>2.53</b>  | <b>0.012</b> | <b>0.023</b> |
| right medial orbitofrontal volume              | <b>0.28</b> | <b>0.020</b>    | <b>0.038</b>    | 0.25        | 0.036           | 0.063           | -0.21        | 0.830        | 0.878        |
| right middle temporal volume                   | <b>0.38</b> | <b>0.001</b>    | <b>0.003</b>    | 0.17        | 0.168           | 0.239           | <b>-2.23</b> | <b>0.026</b> | <b>0.047</b> |
| right parahippocampal volume                   | 0.12        | 0.309           | 0.400           | 0.14        | 0.245           | 0.332           | 0.10         | 0.918        | 0.941        |
| right paracentral volume                       | <b>0.49</b> | <b>1.46e-05</b> | <b>4.86e-05</b> | <b>0.45</b> | <b>9.06e-05</b> | <b>2.63e-04</b> | -0.43        | 0.667        | 0.740        |
| right pars triangularis volume                 | <b>0.44</b> | <b>1.41e-04</b> | <b>3.98e-04</b> | <b>0.60</b> | <b>4.16e-08</b> | <b>2.07e-07</b> | 1.94         | 0.052        | 0.087        |
| right pars opercularis volume                  | <b>0.48</b> | <b>3.10e-05</b> | <b>9.63e-05</b> | <b>0.32</b> | <b>0.007</b>    | <b>0.014</b>    | -1.39        | 0.166        | 0.237        |
| right pars orbitalis volume                    | <b>0.38</b> | <b>0.001</b>    | <b>0.003</b>    | <b>0.42</b> | <b>3.32e-04</b> | <b>8.88e-04</b> | 0.39         | 0.694        | 0.763        |
| right pericalcarine volume                     | <b>0.32</b> | <b>0.006</b>    | <b>0.013</b>    | <b>0.36</b> | <b>0.002</b>    | <b>0.005</b>    | 0.28         | 0.781        | 0.839        |
| right postcentral volume                       | <b>0.50</b> | <b>1.04e-05</b> | <b>3.53e-05</b> | <b>0.50</b> | <b>9.54e-06</b> | <b>3.28e-05</b> | 0.02         | 0.984        | 0.989        |
| right posterior cingulate volume               | <b>0.37</b> | <b>0.002</b>    | <b>0.004</b>    | <b>0.33</b> | <b>0.005</b>    | <b>0.011</b>    | -0.43        | 0.664        | 0.739        |
| right precentral volume                        | <b>0.50</b> | <b>1.12e-05</b> | <b>3.80e-05</b> | <b>0.52</b> | <b>4.93e-06</b> | <b>1.78e-05</b> | 0.18         | 0.858        | 0.898        |
| right precuneus volume                         | <b>0.31</b> | <b>0.008</b>    | <b>0.017</b>    | <b>0.37</b> | <b>0.002</b>    | <b>0.004</b>    | 0.47         | 0.637        | 0.715        |
| right rostral anterior cingulate volume        | <b>0.53</b> | <b>2.12e-06</b> | <b>8.07e-06</b> | <b>0.58</b> | <b>1.85e-07</b> | <b>8.26e-07</b> | 0.55         | 0.580        | 0.667        |
| right rostral middle frontal volume            | <b>0.31</b> | <b>0.008</b>    | <b>0.016</b>    | <b>0.27</b> | <b>0.026</b>    | <b>0.047</b>    | -0.47        | 0.636        | 0.715        |
| right superior frontal volume                  | <b>0.47</b> | <b>3.63e-05</b> | <b>1.12e-04</b> | <b>0.40</b> | <b>5.72e-04</b> | <b>0.001</b>    | -0.80        | 0.422        | 0.517        |
| right superior parietal volume                 | <b>0.28</b> | <b>0.020</b>    | <b>0.037</b>    | <b>0.34</b> | <b>0.004</b>    | <b>0.009</b>    | 0.55         | 0.583        | 0.670        |
| right superior temporal volume                 | <b>0.53</b> | <b>2.03e-06</b> | <b>7.76e-06</b> | <b>0.39</b> | <b>9.15e-04</b> | <b>0.002</b>    | -1.47        | 0.142        | 0.207        |
| right supramarginal volume                     | <b>0.39</b> | <b>9.04e-04</b> | <b>0.002</b>    | <b>0.40</b> | <b>7.07e-04</b> | <b>0.002</b>    | 0.07         | 0.942        | 0.957        |
| right frontal pole volume                      | 0.03        | 0.791           | 0.847           | 0.08        | 0.500           | 0.595           | 0.35         | 0.727        | 0.792        |
| right temporal pole volume                     | 0.11        | 0.365           | 0.463           | 0.12        | 0.333           | 0.427           | 0.04         | 0.967        | 0.977        |



|                                                 |             |                 |                 |             |                 |                 |             |                 |                 |
|-------------------------------------------------|-------------|-----------------|-----------------|-------------|-----------------|-----------------|-------------|-----------------|-----------------|
| right transverse temporal volume                | 0.23        | 0.055           | 0.091           | <b>0.56</b> | <b>4.74e-07</b> | <b>2.00e-06</b> | <b>2.65</b> | <b>0.008</b>    | <b>0.016</b>    |
| right insula volume                             | 0.23        | 0.052           | 0.087           | <b>0.32</b> | <b>0.006</b>    | <b>0.013</b>    | 0.88        | 0.378           | 0.477           |
| left lateral ventricle subcortical volume       | <b>0.96</b> | <b>9.47e-38</b> | <b>2.58e-35</b> | <b>0.96</b> | <b>3.70e-38</b> | <b>1.15e-35</b> | 0.23        | 0.816           | 0.867           |
| left inf lat vent subcortical volume            | <b>0.61</b> | <b>1.48e-08</b> | <b>7.71e-08</b> | <b>0.56</b> | <b>4.09e-07</b> | <b>1.75e-06</b> | -0.53       | 0.594           | 0.679           |
| left cerebellum white matter subcortical volume | <b>0.50</b> | <b>9.03e-06</b> | <b>3.12e-05</b> | <b>0.47</b> | <b>3.52e-05</b> | <b>1.09e-04</b> | -0.33       | 0.738           | 0.802           |
| left cerebellum cortex subcortical volume       | <b>0.74</b> | <b>3.75e-13</b> | <b>3.53e-12</b> | <b>0.77</b> | <b>5.39e-15</b> | <b>6.56e-14</b> | 0.69        | 0.491           | 0.585           |
| left thalamus proper subcortical volume         | <b>0.41</b> | <b>5.04e-04</b> | <b>0.001</b>    | <b>0.55</b> | <b>8.70e-07</b> | <b>3.52e-06</b> | 1.57        | 0.115           | 0.173           |
| left caudate subcortical volume                 | <b>0.49</b> | <b>1.43e-05</b> | <b>4.79e-05</b> | <b>0.44</b> | <b>1.61e-04</b> | <b>4.52e-04</b> | -0.67       | 0.505           | 0.598           |
| left putamen subcortical volume                 | <b>0.38</b> | <b>0.001</b>    | <b>0.003</b>    | <b>0.30</b> | <b>0.011</b>    | <b>0.021</b>    | -0.71       | 0.476           | 0.570           |
| left pallidum subcortical volume                | <b>0.27</b> | <b>0.025</b>    | <b>0.046</b>    | <b>0.33</b> | <b>0.005</b>    | <b>0.011</b>    | 0.47        | 0.638           | 0.716           |
| 3rd ventricle subcortical volume                | <b>0.72</b> | <b>1.65e-12</b> | <b>1.43e-11</b> | <b>0.70</b> | <b>1.44e-11</b> | <b>1.10e-10</b> | -0.52       | 0.600           | 0.683           |
| 4th ventricle subcortical volume                | <b>0.62</b> | <b>7.64e-09</b> | <b>4.15e-08</b> | <b>0.74</b> | <b>1.52e-13</b> | <b>1.49e-12</b> | 1.98        | 0.048           | 0.081           |
| brain stem subcortical volume                   | <b>0.79</b> | <b>3.29e-16</b> | <b>4.97e-15</b> | <b>0.82</b> | <b>1.84e-18</b> | <b>4.26e-17</b> | 0.98        | 0.326           | 0.420           |
| left hippocampus subcortical volume             | 0.25        | 0.038           | 0.067           | <b>0.56</b> | <b>5.50e-07</b> | <b>2.29e-06</b> | <b>2.68</b> | <b>0.007</b>    | <b>0.015</b>    |
| left amygdala subcortical volume                | <b>0.34</b> | <b>0.004</b>    | <b>0.009</b>    | <b>0.28</b> | <b>0.018</b>    | <b>0.033</b>    | -0.49       | 0.621           | 0.702           |
| csf subcortical volume                          | <b>0.59</b> | <b>7.99e-08</b> | <b>3.78e-07</b> | <b>0.62</b> | <b>8.13e-09</b> | <b>4.37e-08</b> | 0.82        | 0.415           | 0.511           |
| left accumbens area subcortical volume          | 0.01        | 0.932           | 0.950           | -0.02       | 0.856           | 0.896           | -0.26       | 0.799           | 0.853           |
| left ventral diencephalon subcortical volume    | <b>0.49</b> | <b>1.68e-05</b> | <b>5.52e-05</b> | <b>0.66</b> | <b>3.62e-10</b> | <b>2.30e-09</b> | 2.14        | 0.032           | 0.058           |
| left vessel subcortical volume                  | 0.02        | 0.853           | 0.895           | 0.02        | 0.839           | 0.885           | 0.01        | 0.989           | 0.992           |
| left choroid plexus subcortical volume          | <b>0.52</b> | <b>3.10e-06</b> | <b>1.16e-05</b> | <b>0.51</b> | <b>6.21e-06</b> | <b>2.21e-05</b> | -0.19       | 0.847           | 0.891           |
| right lateral ventricle subcortical volume      | <b>0.92</b> | <b>3.67e-29</b> | <b>6.67e-27</b> | <b>0.95</b> | <b>1.34e-35</b> | <b>3.25e-33</b> | <b>3.35</b> | <b>7.95e-04</b> | <b>0.002</b>    |
| right inf lat vent subcortical volume           | <b>0.57</b> | <b>3.16e-07</b> | <b>1.37e-06</b> | <b>0.73</b> | <b>1.19e-12</b> | <b>1.05e-11</b> | 2.13        | 0.033           | 0.058           |
| cerebellum white matter subcortical volume      | <b>0.67</b> | <b>1.51e-10</b> | <b>1.01e-09</b> | <b>0.57</b> | <b>2.57e-07</b> | <b>1.13e-06</b> | -1.54       | 0.125           | 0.185           |
| cerebellum cortex subcortical volume            | <b>0.69</b> | <b>4.46e-11</b> | <b>3.11e-10</b> | <b>0.81</b> | <b>2.86e-17</b> | <b>5.23e-16</b> | <b>2.84</b> | <b>0.005</b>    | <b>0.010</b>    |
| right thalamus proper subcortical volume        | <b>0.30</b> | <b>0.013</b>    | <b>0.025</b>    | <b>0.44</b> | <b>1.38e-04</b> | <b>3.91e-04</b> | 1.49        | 0.136           | 0.199           |
| right caudate subcortical volume                | 0.25        | 0.040           | 0.070           | <b>0.40</b> | <b>5.52e-04</b> | <b>0.001</b>    | 1.49        | 0.136           | 0.199           |
| right putamen subcortical volume                | <b>0.29</b> | <b>0.014</b>    | <b>0.027</b>    | <b>0.50</b> | <b>1.22e-05</b> | <b>4.13e-05</b> | 1.70        | 0.089           | 0.138           |
| right pallidum subcortical volume               | 0.24        | 0.043           | 0.074           | 0.14        | 0.243           | 0.330           | -0.64       | 0.520           | 0.613           |
| right hippocampus subcortical volume            | 0.18        | 0.128           | 0.189           | <b>0.48</b> | <b>2.55e-05</b> | <b>8.06e-05</b> | <b>2.40</b> | <b>0.016</b>    | <b>0.031</b>    |
| right amygdala subcortical volume               | 0.24        | 0.048           | 0.081           | <b>0.28</b> | <b>0.021</b>    | <b>0.039</b>    | 0.27        | 0.790           | 0.847           |
| right accumbens area subcortical volume         | 0.19        | 0.122           | 0.181           | 0.12        | 0.336           | 0.430           | -0.48       | 0.633           | 0.712           |
| right ventral diencephalon subcortical volume   | <b>0.59</b> | <b>1.05e-07</b> | <b>4.86e-07</b> | <b>0.52</b> | <b>3.93e-06</b> | <b>1.44e-05</b> | -0.87       | 0.383           | 0.482           |
| right vessel subcortical volume                 | -0.05       | 0.666           | 0.740           | <b>0.81</b> | <b>2.35e-17</b> | <b>4.42e-16</b> | <b>6.44</b> | <b>1.17e-10</b> | <b>7.82e-10</b> |
| right choroid plexus subcortical volume         | <b>0.50</b> | <b>1.01e-05</b> | <b>3.45e-05</b> | <b>0.54</b> | <b>1.12e-06</b> | <b>4.46e-06</b> | 0.51        | 0.607           | 0.690           |

|                                                  |             |                 |                 |             |                 |                 |             |                 |                 |
|--------------------------------------------------|-------------|-----------------|-----------------|-------------|-----------------|-----------------|-------------|-----------------|-----------------|
| optic chiasm subcortical volume                  | 0.02        | 0.891           | 0.921           | 0.06        | 0.627           | 0.707           | 0.32        | 0.752           | 0.815           |
| corpus callosum posterior subcortical volume     | <b>0.44</b> | <b>1.58e-04</b> | <b>4.42e-04</b> | <b>0.51</b> | <b>6.46e-06</b> | <b>2.30e-05</b> | 1.03        | 0.301           | 0.392           |
| corpus callosum mid posterior subcortical volume | 0.17        | 0.152           | 0.219           | 0.18        | 0.128           | 0.189           | 0.15        | 0.884           | 0.916           |
| corpus callosum central subcortical volume       | <b>0.31</b> | <b>0.009</b>    | <b>0.018</b>    | 0.19        | 0.118           | 0.177           | -1.59       | 0.112           | 0.169           |
| corpus callosum mid anterior subcortical volume  | <b>0.34</b> | <b>0.004</b>    | <b>0.010</b>    | 0.21        | 0.087           | 0.136           | -1.65       | 0.100           | 0.153           |
| corpus callosum anterior subcortical volume      | <b>0.47</b> | <b>4.15e-05</b> | <b>1.27e-04</b> | <b>0.75</b> | <b>1.30e-13</b> | <b>1.29e-12</b> | <b>4.04</b> | <b>5.46e-05</b> | <b>1.63e-04</b> |

**STable 5.** Intra-class correlations (ICCs) of regional measurements from standard axial versus standard multi-orientation 64mT scans with 3T scans. Differences between ICC strengths were tested using Steiger's Z. A positive Z-value indicates that multi-orientation regions were more strongly correlated to 3T scans than axial-only regions. Analyses that are statistically significant after correction for multiple comparisons are in bold.

| Measurement                                      | Standard Axial 64mT ICC with 3T |              |              | Standard Multi-Orientation 64mT ICC with 3T |       |       | Steiger      |              |              |
|--------------------------------------------------|---------------------------------|--------------|--------------|---------------------------------------------|-------|-------|--------------|--------------|--------------|
|                                                  | ICC                             | p            | q            | ICC                                         | p     | q     | z            | p            | q            |
| left banks of superior temporal sulcus thickness | -0.20                           | 0.952        | 0.977        | -0.19                                       | 0.944 | 0.973 | 0.07         | 0.947        | 0.975        |
| left caudal anterior cingulate thickness         | 0.01                            | 0.462        | 0.572        | -0.07                                       | 0.724 | 0.809 | -0.59        | 0.554        | 0.656        |
| left caudal middle frontal thickness             | 0.17                            | 0.079        | 0.130        | -0.04                                       | 0.638 | 0.732 | -1.47        | 0.142        | 0.215        |
| left cuneus thickness                            | 0.09                            | 0.239        | 0.336        | -0.01                                       | 0.546 | 0.647 | -0.71        | 0.480        | 0.587        |
| left entorhinal thickness                        | -5.2e-03                        | 0.517        | 0.621        | -0.16                                       | 0.908 | 0.948 | -0.90        | 0.366        | 0.476        |
| left fusiform thickness                          | -0.12                           | 0.847        | 0.907        | -0.16                                       | 0.904 | 0.946 | -0.27        | 0.788        | 0.862        |
| left inferior parietal thickness                 | -0.15                           | 0.898        | 0.941        | -0.19                                       | 0.941 | 0.972 | -0.30        | 0.763        | 0.842        |
| left inferior temporal thickness                 | 0.07                            | 0.293        | 0.396        | -0.11                                       | 0.812 | 0.879 | -1.31        | 0.190        | 0.275        |
| left isthmus cingulate thickness                 | -0.02                           | 0.577        | 0.678        | -0.18                                       | 0.931 | 0.966 | -0.98        | 0.329        | 0.434        |
| left lateral occipital thickness                 | 7.3e-03                         | 0.476        | 0.584        | -7.0e-03                                    | 0.523 | 0.626 | -0.13        | 0.900        | 0.943        |
| left lateral orbitofrontal thickness             | -0.03                           | 0.609        | 0.705        | 0.02                                        | 0.444 | 0.556 | 0.40         | 0.690        | 0.780        |
| left lingual thickness                           | 0.07                            | 0.274        | 0.376        | -0.13                                       | 0.860 | 0.912 | -1.33        | 0.183        | 0.266        |
| left medial orbitofrontal thickness              | -0.29                           | 0.992        | 0.996        | -0.19                                       | 0.948 | 0.975 | 0.76         | 0.447        | 0.559        |
| left middle temporal thickness                   | -0.19                           | 0.940        | 0.972        | -0.27                                       | 0.989 | 0.995 | -0.75        | 0.453        | 0.564        |
| left parahippocampal thickness                   | 0.01                            | 0.454        | 0.565        | 0.20                                        | 0.051 | 0.087 | 1.12         | 0.261        | 0.361        |
| left paracentral thickness                       | 0.05                            | 0.346        | 0.454        | 0.11                                        | 0.179 | 0.261 | 0.39         | 0.697        | 0.783        |
| left pars triangularis thickness                 | <b>0.29</b>                     | <b>0.007</b> | <b>0.016</b> | -0.03                                       | 0.598 | 0.696 | -2.01        | 0.044        | 0.078        |
| left pars opercularis thickness                  | -0.12                           | 0.842        | 0.903        | -0.09                                       | 0.773 | 0.850 | 0.23         | 0.816        | 0.883        |
| left pars orbitalis thickness                    | -0.19                           | 0.943        | 0.973        | -0.26                                       | 0.984 | 0.994 | -0.45        | 0.654        | 0.746        |
| left pericalcarine thickness                     | 0.07                            | 0.274        | 0.376        | 0.02                                        | 0.419 | 0.531 | -0.33        | 0.738        | 0.820        |
| left postcentral thickness                       | 0.12                            | 0.151        | 0.226        | 0.14                                        | 0.119 | 0.186 | 0.10         | 0.920        | 0.958        |
| left posterior cingulate thickness               | -0.13                           | 0.863        | 0.913        | -0.13                                       | 0.857 | 0.911 | 0.02         | 0.981        | 0.993        |
| left precentral thickness                        | 0.08                            | 0.244        | 0.342        | 0.08                                        | 0.246 | 0.344 | -4.3e-03     | 0.997        | 0.997        |
| left precuneus thickness                         | 0.06                            | 0.305        | 0.408        | -0.02                                       | 0.574 | 0.676 | -0.67        | 0.506        | 0.611        |
| left rostral anterior cingulate thickness        | -0.24                           | 0.978        | 0.991        | -0.14                                       | 0.878 | 0.922 | 0.74         | 0.461        | 0.571        |
| left rostral middle frontal thickness            | -0.01                           | 0.542        | 0.643        | -0.25                                       | 0.982 | 0.993 | -1.90        | 0.058        | 0.099        |
| left superior frontal thickness                  | 0.02                            | 0.421        | 0.534        | -0.06                                       | 0.695 | 0.782 | -0.52        | 0.604        | 0.701        |
| left superior parietal thickness                 | 0.04                            | 0.373        | 0.485        | -0.03                                       | 0.586 | 0.684 | -0.39        | 0.696        | 0.783        |
| left superior temporal thickness                 | -0.20                           | 0.952        | 0.977        | -0.23                                       | 0.973 | 0.989 | -0.25        | 0.804        | 0.873        |
| left supramarginal thickness                     | 0.02                            | 0.438        | 0.550        | -0.31                                       | 0.995 | 0.997 | <b>-2.27</b> | <b>0.023</b> | <b>0.043</b> |

|                                                   |         |       |       |         |       |       |              |              |              |
|---------------------------------------------------|---------|-------|-------|---------|-------|-------|--------------|--------------|--------------|
| left frontal pole thickness                       | -0.22   | 0.968 | 0.986 | -0.09   | 0.784 | 0.859 | 0.87         | 0.384        | 0.495        |
| left temporal pole thickness                      | -0.10   | 0.799 | 0.869 | 0.07    | 0.287 | 0.390 | 0.99         | 0.324        | 0.428        |
| left transverse temporal thickness                | -0.25   | 0.980 | 0.993 | -0.27   | 0.990 | 0.995 | -0.21        | 0.831        | 0.894        |
| left insula thickness                             | -0.06   | 0.699 | 0.785 | -0.06   | 0.692 | 0.781 | 0.02         | 0.986        | 0.995        |
| right banks of superior temporal sulcus thickness | -0.10   | 0.789 | 0.862 | -0.18   | 0.928 | 0.963 | -0.53        | 0.599        | 0.697        |
| right caudal anterior cingulate thickness         | -0.13   | 0.859 | 0.912 | -0.22   | 0.966 | 0.985 | -0.68        | 0.495        | 0.601        |
| right caudal middle frontal thickness             | 0.05    | 0.344 | 0.452 | -0.14   | 0.878 | 0.922 | -1.24        | 0.214        | 0.306        |
| right cuneus thickness                            | 0.07    | 0.277 | 0.379 | -0.02   | 0.581 | 0.680 | -0.65        | 0.518        | 0.622        |
| right entorhinal thickness                        | -0.10   | 0.803 | 0.872 | -0.21   | 0.962 | 0.982 | -0.66        | 0.512        | 0.617        |
| right fusiform thickness                          | -0.14   | 0.882 | 0.925 | -0.13   | 0.868 | 0.916 | 0.06         | 0.954        | 0.977        |
| right inferior parietal thickness                 | -0.17   | 0.923 | 0.960 | -0.12   | 0.850 | 0.907 | 0.50         | 0.617        | 0.711        |
| right inferior temporal thickness                 | -0.10   | 0.801 | 0.871 | -0.13   | 0.854 | 0.910 | -0.18        | 0.855        | 0.911        |
| right isthmus cingulate thickness                 | -0.01   | 0.537 | 0.639 | -0.11   | 0.824 | 0.889 | -0.66        | 0.511        | 0.615        |
| right lateral occipital thickness                 | 0.13    | 0.139 | 0.212 | 0.07    | 0.285 | 0.387 | -0.56        | 0.574        | 0.676        |
| right lateral orbitofrontal thickness             | -0.04   | 0.637 | 0.731 | -0.10   | 0.794 | 0.866 | -0.44        | 0.663        | 0.755        |
| right lingual thickness                           | -0.03   | 0.610 | 0.705 | -0.23   | 0.971 | 0.988 | -1.35        | 0.178        | 0.259        |
| right medial orbitofrontal thickness              | -0.31   | 0.996 | 0.997 | -0.21   | 0.961 | 0.982 | 0.87         | 0.386        | 0.496        |
| right middle temporal thickness                   | -0.27   | 0.988 | 0.995 | -0.27   | 0.987 | 0.995 | 0.02         | 0.981        | 0.993        |
| right parahippocampal thickness                   | 0.08    | 0.252 | 0.350 | 0.13    | 0.140 | 0.213 | 0.28         | 0.783        | 0.858        |
| right paracentral thickness                       | 0.14    | 0.125 | 0.194 | 0.13    | 0.146 | 0.220 | -0.08        | 0.933        | 0.966        |
| right pars triangularis thickness                 | 0.19    | 0.059 | 0.100 | -0.01   | 0.535 | 0.637 | -1.17        | 0.240        | 0.337        |
| right pars opercularis thickness                  | -0.04   | 0.638 | 0.732 | 0.04    | 0.359 | 0.469 | 0.70         | 0.486        | 0.592        |
| right pars orbitalis thickness                    | 2.8e-03 | 0.491 | 0.597 | -0.10   | 0.795 | 0.867 | -0.76        | 0.449        | 0.561        |
| right pericalcarine thickness                     | -0.02   | 0.572 | 0.674 | -0.08   | 0.736 | 0.818 | -0.34        | 0.735        | 0.817        |
| right postcentral thickness                       | 0.15    | 0.113 | 0.177 | -0.13   | 0.858 | 0.911 | -1.71        | 0.087        | 0.141        |
| right posterior cingulate thickness               | -0.07   | 0.731 | 0.815 | -0.19   | 0.942 | 0.973 | -0.94        | 0.347        | 0.455        |
| right precentral thickness                        | 0.16    | 0.092 | 0.148 | 5.5e-03 | 0.482 | 0.589 | -1.15        | 0.252        | 0.350        |
| right precuneus thickness                         | 0.06    | 0.299 | 0.402 | -0.12   | 0.836 | 0.897 | -1.45        | 0.147        | 0.221        |
| right rostral anterior cingulate thickness        | -0.30   | 0.994 | 0.997 | -0.10   | 0.806 | 0.874 | 1.43         | 0.154        | 0.229        |
| right rostral middle frontal thickness            | -0.18   | 0.932 | 0.966 | -0.17   | 0.926 | 0.962 | 0.04         | 0.964        | 0.984        |
| right superior frontal thickness                  | 0.16    | 0.098 | 0.157 | 2.6e-03 | 0.491 | 0.597 | -1.16        | 0.247        | 0.345        |
| right superior parietal thickness                 | 0.10    | 0.200 | 0.288 | 0.15    | 0.103 | 0.164 | 0.41         | 0.685        | 0.775        |
| right superior temporal thickness                 | -0.17   | 0.922 | 0.959 | -0.28   | 0.991 | 0.996 | -0.80        | 0.422        | 0.535        |
| right supramarginal thickness                     | 0.18    | 0.062 | 0.105 | -0.29   | 0.993 | 0.996 | <b>-3.23</b> | <b>0.001</b> | <b>0.003</b> |

|                                             |             |                 |                 |             |                 |                 |             |              |              |
|---------------------------------------------|-------------|-----------------|-----------------|-------------|-----------------|-----------------|-------------|--------------|--------------|
| right frontal pole thickness                | -0.09       | 0.780           | 0.856           | -0.12       | 0.843           | 0.903           | -0.19       | 0.852        | 0.908        |
| right temporal pole thickness               | 0.10        | 0.213           | 0.304           | -0.13       | 0.858           | 0.911           | -1.34       | 0.180        | 0.263        |
| right transverse temporal thickness         | -0.02       | 0.572           | 0.674           | -0.20       | 0.953           | 0.977           | -1.22       | 0.222        | 0.315        |
| right insula thickness                      | -0.06       | 0.678           | 0.768           | -0.05       | 0.652           | 0.745           | 0.05        | 0.957        | 0.979        |
| left banks of superior temporal sulcus area | <b>0.34</b> | <b>0.002</b>    | <b>0.004</b>    | <b>0.59</b> | <b>3.30e-08</b> | <b>1.68e-07</b> | <b>2.24</b> | <b>0.025</b> | <b>0.047</b> |
| left caudal anterior cingulate area         | <b>0.28</b> | <b>0.008</b>    | <b>0.017</b>    | 0.17        | 0.075           | 0.124           | -1.35       | 0.177        | 0.259        |
| left caudal middle frontal area             | <b>0.29</b> | <b>0.007</b>    | <b>0.015</b>    | <b>0.45</b> | <b>4.33e-05</b> | <b>1.37e-04</b> | 1.32        | 0.188        | 0.273        |
| left cuneus area                            | <b>0.41</b> | <b>2.15e-04</b> | <b>6.02e-04</b> | <b>0.44</b> | <b>5.45e-05</b> | <b>1.69e-04</b> | 0.25        | 0.799        | 0.869        |
| left entorhinal area                        | -0.06       | 0.692           | 0.781           | 0.05        | 0.331           | 0.436           | 0.69        | 0.493        | 0.599        |
| left fusiform area                          | <b>0.31</b> | <b>0.005</b>    | <b>0.010</b>    | <b>0.38</b> | <b>5.97e-04</b> | <b>0.002</b>    | 0.53        | 0.593        | 0.691        |
| left inferior parietal area                 | <b>0.57</b> | <b>1.03e-07</b> | <b>4.99e-07</b> | <b>0.68</b> | <b>3.24e-11</b> | <b>2.35e-10</b> | 1.34        | 0.181        | 0.263        |
| left inferior temporal area                 | <b>0.42</b> | <b>1.25e-04</b> | <b>3.64e-04</b> | <b>0.56</b> | <b>2.09e-07</b> | <b>9.67e-07</b> | 1.35        | 0.176        | 0.258        |
| left isthmus cingulate area                 | <b>0.33</b> | <b>0.002</b>    | <b>0.005</b>    | 0.17        | 0.078           | 0.129           | -1.08       | 0.279        | 0.381        |
| left lateral occipital area                 | <b>0.32</b> | <b>0.003</b>    | <b>0.007</b>    | <b>0.53</b> | <b>1.25e-06</b> | <b>5.14e-06</b> | 1.47        | 0.141        | 0.214        |
| left lateral orbitofrontal area             | <b>0.51</b> | <b>2.90e-06</b> | <b>1.13e-05</b> | <b>0.61</b> | <b>7.14e-09</b> | <b>3.95e-08</b> | 1.17        | 0.243        | 0.340        |
| left lingual area                           | <b>0.24</b> | <b>0.023</b>    | <b>0.042</b>    | <b>0.40</b> | <b>2.89e-04</b> | <b>7.88e-04</b> | 1.02        | 0.309        | 0.412        |
| left medial orbitofrontal area              | <b>0.48</b> | <b>1.09e-05</b> | <b>3.84e-05</b> | <b>0.52</b> | <b>1.43e-06</b> | <b>5.84e-06</b> | 0.43        | 0.670        | 0.760        |
| left middle temporal area                   | <b>0.45</b> | <b>4.19e-05</b> | <b>1.32e-04</b> | <b>0.39</b> | <b>4.21e-04</b> | <b>0.001</b>    | -0.55       | 0.583        | 0.682        |
| left parahippocampal area                   | -0.16       | 0.906           | 0.947           | 0.05        | 0.353           | 0.462           | 1.23        | 0.218        | 0.311        |
| left paracentral area                       | <b>0.34</b> | <b>0.002</b>    | <b>0.004</b>    | <b>0.68</b> | <b>2.52e-11</b> | <b>1.86e-10</b> | <b>3.16</b> | <b>0.002</b> | <b>0.004</b> |
| left pars triangularis area                 | <b>0.40</b> | <b>3.23e-04</b> | <b>8.75e-04</b> | <b>0.39</b> | <b>3.39e-04</b> | <b>9.16e-04</b> | -0.01       | 0.989        | 0.995        |
| left pars opercularis area                  | <b>0.45</b> | <b>4.43e-05</b> | <b>1.39e-04</b> | <b>0.44</b> | <b>6.32e-05</b> | <b>1.93e-04</b> | -0.07       | 0.944        | 0.973        |
| left pars orbitalis area                    | <b>0.59</b> | <b>4.06e-08</b> | <b>2.04e-07</b> | <b>0.51</b> | <b>3.00e-06</b> | <b>1.16e-05</b> | -0.78       | 0.438        | 0.550        |
| left pericalcarine area                     | <b>0.33</b> | <b>0.002</b>    | <b>0.006</b>    | <b>0.38</b> | <b>5.62e-04</b> | <b>0.001</b>    | 0.34        | 0.731        | 0.815        |
| left postcentral area                       | 0.20        | 0.044           | 0.078           | <b>0.23</b> | <b>0.026</b>    | <b>0.047</b>    | 0.20        | 0.839        | 0.900        |
| left posterior cingulate area               | <b>0.30</b> | <b>0.006</b>    | <b>0.013</b>    | <b>0.37</b> | <b>8.03e-04</b> | <b>0.002</b>    | 0.77        | 0.442        | 0.554        |
| left precentral area                        | <b>0.35</b> | <b>0.001</b>    | <b>0.003</b>    | <b>0.46</b> | <b>3.05e-05</b> | <b>9.90e-05</b> | 0.91        | 0.365        | 0.475        |
| left precuneus area                         | <b>0.31</b> | <b>0.004</b>    | <b>0.010</b>    | <b>0.42</b> | <b>1.21e-04</b> | <b>3.54e-04</b> | 0.86        | 0.392        | 0.503        |
| left rostral anterior cingulate area        | <b>0.33</b> | <b>0.003</b>    | <b>0.006</b>    | <b>0.26</b> | <b>0.016</b>    | <b>0.030</b>    | -0.68       | 0.498        | 0.604        |
| left rostral middle frontal area            | <b>0.56</b> | <b>2.02e-07</b> | <b>9.38e-07</b> | <b>0.63</b> | <b>2.14e-09</b> | <b>1.27e-08</b> | 0.88        | 0.381        | 0.492        |
| left superior frontal area                  | <b>0.52</b> | <b>1.89e-06</b> | <b>7.54e-06</b> | <b>0.63</b> | <b>2.76e-09</b> | <b>1.61e-08</b> | 1.29        | 0.198        | 0.285        |
| left superior parietal area                 | <b>0.37</b> | <b>7.83e-04</b> | <b>0.002</b>    | <b>0.48</b> | <b>1.03e-05</b> | <b>3.67e-05</b> | 0.93        | 0.350        | 0.459        |
| left superior temporal area                 | <b>0.29</b> | <b>0.008</b>    | <b>0.016</b>    | <b>0.49</b> | <b>8.71e-06</b> | <b>3.14e-05</b> | 1.66        | 0.097        | 0.155        |
| left supramarginal area                     | <b>0.50</b> | <b>3.88e-06</b> | <b>1.47e-05</b> | <b>0.48</b> | <b>1.12e-05</b> | <b>3.92e-05</b> | -0.23       | 0.818        | 0.884        |
| left frontal pole area                      | <b>0.24</b> | <b>0.020</b>    | <b>0.038</b>    | 0.12        | 0.151           | 0.226           | -0.73       | 0.467        | 0.577        |

|                                              |             |                 |                 |             |                 |                 |              |              |              |
|----------------------------------------------|-------------|-----------------|-----------------|-------------|-----------------|-----------------|--------------|--------------|--------------|
| left temporal pole area                      | -0.06       | 0.693           | 0.781           | 0.07        | 0.274           | 0.376           | 0.74         | 0.459        | 0.569        |
| left transverse temporal area                | 0.13        | 0.145           | 0.219           | <b>0.44</b> | <b>7.45e-05</b> | <b>2.25e-04</b> | 2.17         | 0.030        | 0.054        |
| left insula area                             | <b>0.27</b> | <b>0.012</b>    | <b>0.024</b>    | <b>0.27</b> | <b>0.013</b>    | <b>0.025</b>    | -0.02        | 0.981        | 0.993        |
| right banks of superior temporal sulcus area | <b>0.39</b> | <b>3.81e-04</b> | <b>0.001</b>    | <b>0.32</b> | <b>0.003</b>    | <b>0.007</b>    | -0.61        | 0.539        | 0.640        |
| right caudal anterior cingulate area         | <b>0.49</b> | <b>8.19e-06</b> | <b>2.97e-05</b> | <b>0.53</b> | <b>1.04e-06</b> | <b>4.35e-06</b> | 0.57         | 0.567        | 0.671        |
| right caudal middle frontal area             | <b>0.40</b> | <b>2.76e-04</b> | <b>7.58e-04</b> | <b>0.46</b> | <b>3.32e-05</b> | <b>1.07e-04</b> | 0.52         | 0.605        | 0.701        |
| right cuneus area                            | 0.17        | 0.073           | 0.122           | <b>0.33</b> | <b>0.003</b>    | <b>0.006</b>    | 1.11         | 0.266        | 0.366        |
| right entorhinal area                        | -0.13       | 0.863           | 0.913           | 0.12        | 0.169           | 0.250           | 1.72         | 0.086        | 0.140        |
| right fusiform area                          | <b>0.43</b> | <b>1.03e-04</b> | <b>3.01e-04</b> | <b>0.58</b> | <b>6.15e-08</b> | <b>3.02e-07</b> | 1.35         | 0.177        | 0.259        |
| right inferior parietal area                 | <b>0.49</b> | <b>6.16e-06</b> | <b>2.28e-05</b> | <b>0.57</b> | <b>1.42e-07</b> | <b>6.76e-07</b> | 0.79         | 0.427        | 0.538        |
| right inferior temporal area                 | <b>0.52</b> | <b>1.36e-06</b> | <b>5.57e-06</b> | <b>0.59</b> | <b>3.37e-08</b> | <b>1.71e-07</b> | 0.74         | 0.459        | 0.569        |
| right isthmus cingulate area                 | 0.17        | 0.072           | 0.121           | <b>0.31</b> | <b>0.004</b>    | <b>0.009</b>    | 1.17         | 0.244        | 0.341        |
| right lateral occipital area                 | <b>0.54</b> | <b>6.37e-07</b> | <b>2.77e-06</b> | <b>0.67</b> | <b>9.85e-11</b> | <b>6.81e-10</b> | 1.35         | 0.175        | 0.258        |
| right lateral orbitofrontal area             | <b>0.51</b> | <b>3.26e-06</b> | <b>1.25e-05</b> | <b>0.48</b> | <b>1.25e-05</b> | <b>4.34e-05</b> | -0.26        | 0.797        | 0.868        |
| right lingual area                           | 0.10        | 0.209           | 0.299           | <b>0.49</b> | <b>9.01e-06</b> | <b>3.24e-05</b> | <b>2.96</b>  | <b>0.003</b> | <b>0.007</b> |
| right medial orbitofrontal area              | <b>0.43</b> | <b>1.05e-04</b> | <b>3.09e-04</b> | <b>0.41</b> | <b>2.07e-04</b> | <b>5.82e-04</b> | -0.16        | 0.870        | 0.917        |
| right middle temporal area                   | <b>0.45</b> | <b>4.27e-05</b> | <b>1.35e-04</b> | 0.22        | 0.036           | 0.064           | <b>-2.25</b> | <b>0.024</b> | <b>0.045</b> |
| right parahippocampal area                   | 0.02        | 0.433           | 0.545           | 0.15        | 0.112           | 0.176           | 0.79         | 0.429        | 0.541        |
| right paracentral area                       | <b>0.36</b> | <b>9.93e-04</b> | <b>0.002</b>    | <b>0.47</b> | <b>1.71e-05</b> | <b>5.82e-05</b> | 1.03         | 0.301        | 0.403        |
| right pars triangularis area                 | <b>0.42</b> | <b>1.46e-04</b> | <b>4.19e-04</b> | <b>0.54</b> | <b>7.53e-07</b> | <b>3.22e-06</b> | 1.26         | 0.208        | 0.298        |
| right pars opercularis area                  | <b>0.48</b> | <b>1.10e-05</b> | <b>3.85e-05</b> | <b>0.38</b> | <b>4.63e-04</b> | <b>0.001</b>    | -0.82        | 0.413        | 0.525        |
| right pars orbitalis area                    | <b>0.35</b> | <b>0.001</b>    | <b>0.003</b>    | <b>0.49</b> | <b>5.83e-06</b> | <b>2.17e-05</b> | 1.35         | 0.175        | 0.258        |
| right pericalcarine area                     | <b>0.44</b> | <b>6.86e-05</b> | <b>2.09e-04</b> | <b>0.28</b> | <b>0.009</b>    | <b>0.019</b>    | -1.47        | 0.141        | 0.214        |
| right postcentral area                       | <b>0.43</b> | <b>7.50e-05</b> | <b>2.26e-04</b> | <b>0.45</b> | <b>3.66e-05</b> | <b>1.17e-04</b> | 0.19         | 0.850        | 0.907        |
| right posterior cingulate area               | <b>0.32</b> | <b>0.003</b>    | <b>0.007</b>    | <b>0.35</b> | <b>0.001</b>    | <b>0.003</b>    | 0.37         | 0.714        | 0.799        |
| right precentral area                        | <b>0.48</b> | <b>1.16e-05</b> | <b>4.03e-05</b> | <b>0.48</b> | <b>1.06e-05</b> | <b>3.75e-05</b> | 0.02         | 0.984        | 0.994        |
| right precuneus area                         | <b>0.43</b> | <b>8.69e-05</b> | <b>2.58e-04</b> | <b>0.43</b> | <b>9.91e-05</b> | <b>2.92e-04</b> | -0.03        | 0.977        | 0.991        |
| right rostral anterior cingulate area        | <b>0.41</b> | <b>1.91e-04</b> | <b>5.40e-04</b> | <b>0.40</b> | <b>2.67e-04</b> | <b>7.38e-04</b> | -0.12        | 0.907        | 0.948        |
| right rostral middle frontal area            | <b>0.40</b> | <b>2.73e-04</b> | <b>7.50e-04</b> | <b>0.51</b> | <b>3.31e-06</b> | <b>1.27e-05</b> | 1.09         | 0.276        | 0.378        |
| right superior frontal area                  | <b>0.51</b> | <b>3.49e-06</b> | <b>1.34e-05</b> | <b>0.62</b> | <b>5.09e-09</b> | <b>2.86e-08</b> | 1.42         | 0.157        | 0.233        |
| right superior parietal area                 | 0.21        | 0.040           | 0.071           | 0.23        | 0.027           | 0.050           | 0.15         | 0.881        | 0.925        |
| right superior temporal area                 | <b>0.48</b> | <b>1.18e-05</b> | <b>4.10e-05</b> | <b>0.35</b> | <b>0.001</b>    | <b>0.003</b>    | -1.07        | 0.286        | 0.388        |
| right supramarginal area                     | <b>0.27</b> | <b>0.011</b>    | <b>0.023</b>    | <b>0.28</b> | <b>0.009</b>    | <b>0.019</b>    | 0.07         | 0.948        | 0.975        |
| right frontal pole area                      | <b>0.26</b> | <b>0.014</b>    | <b>0.028</b>    | 0.20        | 0.050           | 0.086           | -0.49        | 0.625        | 0.720        |

|                                               |             |                 |                 |             |                 |                 |             |              |              |
|-----------------------------------------------|-------------|-----------------|-----------------|-------------|-----------------|-----------------|-------------|--------------|--------------|
| right temporal pole area                      | 4.7e-03     | 0.485           | 0.591           | 0.14        | 0.129           | 0.199           | 0.71        | 0.475        | 0.584        |
| right transverse temporal area                | <b>0.25</b> | <b>0.016</b>    | <b>0.031</b>    | <b>0.48</b> | <b>1.03e-05</b> | <b>3.67e-05</b> | 1.76        | 0.079        | 0.130        |
| right insula area                             | 0.16        | 0.087           | 0.142           | 0.19        | 0.060           | 0.101           | 0.23        | 0.818        | 0.884        |
| left banks of superior temporal sulcus volume | <b>0.25</b> | <b>0.017</b>    | <b>0.033</b>    | <b>0.53</b> | <b>9.84e-07</b> | <b>4.15e-06</b> | <b>2.55</b> | <b>0.011</b> | <b>0.022</b> |
| left caudal anterior cingulate volume         | <b>0.29</b> | <b>0.008</b>    | <b>0.016</b>    | 0.12        | 0.160           | 0.238           | -1.87       | 0.062        | 0.105        |
| left caudal middle frontal volume             | <b>0.34</b> | <b>0.002</b>    | <b>0.004</b>    | <b>0.48</b> | <b>9.63e-06</b> | <b>3.43e-05</b> | 1.14        | 0.254        | 0.352        |
| left cuneus volume                            | <b>0.30</b> | <b>0.005</b>    | <b>0.011</b>    | <b>0.45</b> | <b>3.77e-05</b> | <b>1.20e-04</b> | 1.05        | 0.292        | 0.395        |
| left entorhinal volume                        | -0.10       | 0.798           | 0.868           | 0.04        | 0.379           | 0.490           | 0.82        | 0.412        | 0.524        |
| left fusiform volume                          | <b>0.31</b> | <b>0.005</b>    | <b>0.010</b>    | <b>0.41</b> | <b>1.90e-04</b> | <b>5.39e-04</b> | 0.89        | 0.375        | 0.486        |
| left inferior parietal volume                 | <b>0.53</b> | <b>1.21e-06</b> | <b>5.01e-06</b> | <b>0.59</b> | <b>2.84e-08</b> | <b>1.46e-07</b> | 0.68        | 0.494        | 0.600        |
| left inferior temporal volume                 | <b>0.45</b> | <b>4.57e-05</b> | <b>1.43e-04</b> | <b>0.56</b> | <b>2.36e-07</b> | <b>1.08e-06</b> | 1.06        | 0.288        | 0.390        |
| left isthmus cingulate volume                 | <b>0.30</b> | <b>0.006</b>    | <b>0.013</b>    | 0.16        | 0.089           | 0.145           | -0.96       | 0.337        | 0.444        |
| left lateral occipital volume                 | <b>0.39</b> | <b>4.22e-04</b> | <b>0.001</b>    | <b>0.49</b> | <b>8.54e-06</b> | <b>3.09e-05</b> | 0.76        | 0.450        | 0.561        |
| left lateral orbitofrontal volume             | <b>0.47</b> | <b>2.19e-05</b> | <b>7.34e-05</b> | <b>0.50</b> | <b>4.89e-06</b> | <b>1.84e-05</b> | 0.31        | 0.757        | 0.836        |
| left lingual volume                           | 0.12        | 0.155           | 0.231           | <b>0.44</b> | <b>5.97e-05</b> | <b>1.84e-04</b> | 2.06        | 0.039        | 0.070        |
| left medial orbitofrontal volume              | <b>0.28</b> | <b>0.009</b>    | <b>0.018</b>    | 0.20        | 0.044           | 0.078           | -0.65       | 0.513        | 0.617        |
| left middle temporal volume                   | <b>0.30</b> | <b>0.006</b>    | <b>0.013</b>    | <b>0.36</b> | <b>0.001</b>    | <b>0.003</b>    | 0.56        | 0.578        | 0.678        |
| left parahippocampal volume                   | -0.03       | 0.603           | 0.700           | 0.07        | 0.286           | 0.388           | 0.64        | 0.524        | 0.627        |
| left paracentral volume                       | <b>0.31</b> | <b>0.004</b>    | <b>0.009</b>    | <b>0.52</b> | <b>2.09e-06</b> | <b>8.29e-06</b> | 1.74        | 0.082        | 0.135        |
| left pars triangularis volume                 | <b>0.46</b> | <b>3.10e-05</b> | <b>1.00e-04</b> | <b>0.37</b> | <b>6.37e-04</b> | <b>0.002</b>    | -0.86       | 0.388        | 0.499        |
| left pars opercularis volume                  | <b>0.35</b> | <b>0.001</b>    | <b>0.003</b>    | <b>0.45</b> | <b>3.75e-05</b> | <b>1.20e-04</b> | 0.83        | 0.408        | 0.521        |
| left pars orbitalis volume                    | <b>0.53</b> | <b>7.98e-07</b> | <b>3.40e-06</b> | <b>0.53</b> | <b>1.13e-06</b> | <b>4.70e-06</b> | -0.07       | 0.940        | 0.972        |
| left pericalcarine volume                     | <b>0.31</b> | <b>0.004</b>    | <b>0.009</b>    | <b>0.39</b> | <b>3.43e-04</b> | <b>9.26e-04</b> | 0.54        | 0.586        | 0.684        |
| left postcentral volume                       | 0.22        | 0.034           | 0.061           | <b>0.46</b> | <b>2.29e-05</b> | <b>7.65e-05</b> | 1.93        | 0.054        | 0.093        |
| left posterior cingulate volume               | <b>0.27</b> | <b>0.011</b>    | <b>0.022</b>    | <b>0.24</b> | <b>0.020</b>    | <b>0.038</b>    | -0.27       | 0.789        | 0.862        |
| left precentral volume                        | <b>0.35</b> | <b>0.001</b>    | <b>0.003</b>    | <b>0.51</b> | <b>2.25e-06</b> | <b>8.87e-06</b> | 1.49        | 0.135        | 0.206        |
| left precuneus volume                         | <b>0.27</b> | <b>0.011</b>    | <b>0.022</b>    | <b>0.39</b> | <b>4.24e-04</b> | <b>0.001</b>    | 0.82        | 0.412        | 0.525        |
| left rostral anterior cingulate volume        | <b>0.32</b> | <b>0.003</b>    | <b>0.007</b>    | 0.21        | 0.041           | 0.072           | -1.08       | 0.280        | 0.381        |
| left rostral middle frontal volume            | <b>0.46</b> | <b>2.40e-05</b> | <b>8.00e-05</b> | <b>0.36</b> | <b>8.86e-04</b> | <b>0.002</b>    | -1.08       | 0.279        | 0.381        |
| left superior frontal volume                  | <b>0.36</b> | <b>0.001</b>    | <b>0.003</b>    | <b>0.35</b> | <b>0.001</b>    | <b>0.003</b>    | -0.03       | 0.979        | 0.992        |
| left superior parietal volume                 | <b>0.46</b> | <b>2.27e-05</b> | <b>7.58e-05</b> | <b>0.58</b> | <b>7.06e-08</b> | <b>3.45e-07</b> | 1.10        | 0.270        | 0.372        |
| left superior temporal volume                 | 0.19        | 0.055           | 0.094           | <b>0.48</b> | <b>1.12e-05</b> | <b>3.91e-05</b> | <b>2.48</b> | <b>0.013</b> | <b>0.026</b> |
| left supramarginal volume                     | <b>0.38</b> | <b>5.15e-04</b> | <b>0.001</b>    | <b>0.52</b> | <b>1.52e-06</b> | <b>6.18e-06</b> | 1.57        | 0.117        | 0.183        |
| left frontal pole volume                      | -0.04       | 0.624           | 0.718           | -0.08       | 0.744           | 0.825           | -0.25       | 0.805        | 0.874        |
| left temporal pole volume                     | -0.07       | 0.707           | 0.792           | 0.09        | 0.234           | 0.330           | 0.86        | 0.392        | 0.503        |

|                                                |             |                 |                 |             |                 |                 |              |              |              |
|------------------------------------------------|-------------|-----------------|-----------------|-------------|-----------------|-----------------|--------------|--------------|--------------|
| left transverse temporal volume                | 0.08        | 0.243           | 0.340           | <b>0.35</b> | <b>0.001</b>    | <b>0.003</b>    | 1.91         | 0.056        | 0.096        |
| left insula volume                             | <b>0.41</b> | <b>1.80e-04</b> | <b>5.12e-04</b> | <b>0.55</b> | <b>3.06e-07</b> | <b>1.37e-06</b> | 1.40         | 0.163        | 0.242        |
| right banks of superior temporal sulcus volume | <b>0.39</b> | <b>3.36e-04</b> | <b>9.07e-04</b> | <b>0.40</b> | <b>2.73e-04</b> | <b>7.50e-04</b> | 0.06         | 0.953        | 0.977        |
| right caudal anterior cingulate volume         | <b>0.58</b> | <b>6.08e-08</b> | <b>2.99e-07</b> | <b>0.47</b> | <b>1.48e-05</b> | <b>5.06e-05</b> | -1.38        | 0.168        | 0.248        |
| right caudal middle frontal volume             | <b>0.40</b> | <b>3.11e-04</b> | <b>8.47e-04</b> | <b>0.38</b> | <b>6.01e-04</b> | <b>0.002</b>    | -0.17        | 0.866        | 0.915        |
| right cuneus volume                            | 0.16        | 0.093           | 0.150           | <b>0.28</b> | <b>0.009</b>    | <b>0.018</b>    | 0.83         | 0.408        | 0.521        |
| right entorhinal volume                        | -0.21       | 0.961           | 0.982           | 0.06        | 0.314           | 0.417           | 1.91         | 0.056        | 0.095        |
| right fusiform volume                          | <b>0.31</b> | <b>0.005</b>    | <b>0.011</b>    | <b>0.42</b> | <b>1.31e-04</b> | <b>3.80e-04</b> | 0.89         | 0.373        | 0.485        |
| right inferior parietal volume                 | <b>0.42</b> | <b>1.33e-04</b> | <b>3.85e-04</b> | <b>0.52</b> | <b>1.96e-06</b> | <b>7.80e-06</b> | 1.04         | 0.297        | 0.400        |
| right inferior temporal volume                 | <b>0.47</b> | <b>1.43e-05</b> | <b>4.92e-05</b> | <b>0.55</b> | <b>2.89e-07</b> | <b>1.30e-06</b> | 0.75         | 0.455        | 0.565        |
| right isthmus cingulate volume                 | 0.18        | 0.072           | 0.120           | 0.21        | 0.037           | 0.066           | 0.33         | 0.745        | 0.825        |
| right lateral occipital volume                 | <b>0.56</b> | <b>1.46e-07</b> | <b>6.91e-07</b> | <b>0.64</b> | <b>1.09e-09</b> | <b>6.59e-09</b> | 0.81         | 0.416        | 0.528        |
| right lateral orbitofrontal volume             | <b>0.49</b> | <b>9.01e-06</b> | <b>3.24e-05</b> | <b>0.28</b> | <b>0.010</b>    | <b>0.020</b>    | -1.63        | 0.103        | 0.164        |
| right lingual volume                           | 0.04        | 0.381           | 0.492           | <b>0.39</b> | <b>4.26e-04</b> | <b>0.001</b>    | <b>2.50</b>  | <b>0.012</b> | <b>0.025</b> |
| right medial orbitofrontal volume              | <b>0.27</b> | <b>0.010</b>    | <b>0.021</b>    | <b>0.25</b> | <b>0.017</b>    | <b>0.033</b>    | -0.19        | 0.849        | 0.907        |
| right middle temporal volume                   | <b>0.38</b> | <b>5.09e-04</b> | <b>0.001</b>    | 0.16        | 0.088           | 0.143           | <b>-2.24</b> | <b>0.025</b> | <b>0.047</b> |
| right parahippocampal volume                   | 0.09        | 0.233           | 0.329           | 0.13        | 0.132           | 0.203           | 0.28         | 0.783        | 0.858        |
| right paracentral volume                       | <b>0.45</b> | <b>3.43e-05</b> | <b>1.10e-04</b> | <b>0.41</b> | <b>1.77e-04</b> | <b>5.06e-04</b> | -0.42        | 0.676        | 0.767        |
| right pars triangularis volume                 | <b>0.43</b> | <b>8.39e-05</b> | <b>2.50e-04</b> | <b>0.56</b> | <b>2.34e-07</b> | <b>1.07e-06</b> | 1.44         | 0.149        | 0.223        |
| right pars opercularis volume                  | <b>0.48</b> | <b>1.40e-05</b> | <b>4.80e-05</b> | <b>0.32</b> | <b>0.004</b>    | <b>0.008</b>    | -1.41        | 0.159        | 0.236        |
| right pars orbitalis volume                    | <b>0.36</b> | <b>0.001</b>    | <b>0.003</b>    | <b>0.40</b> | <b>2.85e-04</b> | <b>7.82e-04</b> | 0.37         | 0.714        | 0.799        |
| right pericalcarine volume                     | <b>0.32</b> | <b>0.003</b>    | <b>0.007</b>    | <b>0.36</b> | <b>0.001</b>    | <b>0.003</b>    | 0.29         | 0.771        | 0.848        |
| right postcentral volume                       | <b>0.48</b> | <b>9.43e-06</b> | <b>3.37e-05</b> | <b>0.46</b> | <b>3.01e-05</b> | <b>9.82e-05</b> | -0.29        | 0.773        | 0.850        |
| right posterior cingulate volume               | <b>0.37</b> | <b>8.09e-04</b> | <b>0.002</b>    | <b>0.33</b> | <b>0.003</b>    | <b>0.006</b>    | -0.45        | 0.656        | 0.748        |
| right precentral volume                        | <b>0.48</b> | <b>1.06e-05</b> | <b>3.74e-05</b> | <b>0.45</b> | <b>3.67e-05</b> | <b>1.17e-04</b> | -0.29        | 0.774        | 0.850        |
| right precuneus volume                         | <b>0.31</b> | <b>0.004</b>    | <b>0.010</b>    | <b>0.34</b> | <b>0.002</b>    | <b>0.005</b>    | 0.22         | 0.829        | 0.893        |
| right rostral anterior cingulate volume        | <b>0.40</b> | <b>2.69e-04</b> | <b>7.42e-04</b> | <b>0.46</b> | <b>2.79e-05</b> | <b>9.17e-05</b> | 0.68         | 0.499        | 0.604        |
| right rostral middle frontal volume            | <b>0.26</b> | <b>0.015</b>    | <b>0.030</b>    | 0.22        | 0.033           | 0.061           | -0.36        | 0.717        | 0.803        |
| right superior frontal volume                  | <b>0.43</b> | <b>8.13e-05</b> | <b>2.44e-04</b> | <b>0.34</b> | <b>0.002</b>    | <b>0.004</b>    | -1.01        | 0.311        | 0.414        |
| right superior parietal volume                 | <b>0.25</b> | <b>0.017</b>    | <b>0.033</b>    | <b>0.27</b> | <b>0.011</b>    | <b>0.022</b>    | 0.17         | 0.863        | 0.913        |
| right superior temporal volume                 | <b>0.53</b> | <b>1.04e-06</b> | <b>4.37e-06</b> | <b>0.38</b> | <b>5.61e-04</b> | <b>0.001</b>    | -1.51        | 0.132        | 0.203        |
| right supramarginal volume                     | <b>0.34</b> | <b>0.002</b>    | <b>0.004</b>    | <b>0.34</b> | <b>0.002</b>    | <b>0.005</b>    | -0.07        | 0.943        | 0.973        |
| right frontal pole volume                      | 0.03        | 0.396           | 0.506           | 0.08        | 0.250           | 0.348           | 0.35         | 0.730        | 0.814        |
| right temporal pole volume                     | 0.08        | 0.242           | 0.340           | 0.10        | 0.207           | 0.296           | 0.08         | 0.939        | 0.972        |



|                                                 |             |                 |                 |             |                 |                 |             |                 |                 |
|-------------------------------------------------|-------------|-----------------|-----------------|-------------|-----------------|-----------------|-------------|-----------------|-----------------|
| right transverse temporal volume                | 0.23        | 0.027           | 0.050           | <b>0.56</b> | <b>2.02e-07</b> | <b>9.38e-07</b> | <b>2.64</b> | <b>0.008</b>    | <b>0.017</b>    |
| right insula volume                             | 0.20        | 0.049           | 0.085           | <b>0.31</b> | <b>0.004</b>    | <b>0.009</b>    | 1.06        | 0.288           | 0.391           |
| left lateral ventricle subcortical volume       | <b>0.95</b> | <b>2.89e-36</b> | <b>7.86e-34</b> | <b>0.95</b> | <b>1.98e-36</b> | <b>6.16e-34</b> | 0.10        | 0.920           | 0.958           |
| left inf lat vent subcortical volume            | <b>0.53</b> | <b>9.80e-07</b> | <b>4.14e-06</b> | <b>0.49</b> | <b>7.89e-06</b> | <b>2.87e-05</b> | -0.39       | 0.697           | 0.784           |
| left cerebellum white matter subcortical volume | <b>0.44</b> | <b>6.51e-05</b> | <b>1.99e-04</b> | <b>0.38</b> | <b>4.94e-04</b> | <b>0.001</b>    | -0.59       | 0.558           | 0.660           |
| left cerebellum cortex subcortical volume       | <b>0.73</b> | <b>2.57e-13</b> | <b>2.51e-12</b> | <b>0.76</b> | <b>1.16e-14</b> | <b>1.35e-13</b> | 0.51        | 0.612           | 0.707           |
| left thalamus proper subcortical volume         | <b>0.39</b> | <b>4.05e-04</b> | <b>0.001</b>    | <b>0.53</b> | <b>1.03e-06</b> | <b>4.32e-06</b> | 1.52        | 0.128           | 0.198           |
| left caudate subcortical volume                 | <b>0.47</b> | <b>1.52e-05</b> | <b>5.19e-05</b> | <b>0.43</b> | <b>8.53e-05</b> | <b>2.53e-04</b> | -0.48       | 0.632           | 0.726           |
| left putamen subcortical volume                 | <b>0.38</b> | <b>5.65e-04</b> | <b>0.001</b>    | <b>0.30</b> | <b>0.005</b>    | <b>0.012</b>    | -0.71       | 0.476           | 0.584           |
| left pallidum subcortical volume                | <b>0.26</b> | <b>0.016</b>    | <b>0.030</b>    | <b>0.33</b> | <b>0.003</b>    | <b>0.006</b>    | 0.52        | 0.601           | 0.698           |
| 3rd ventricle subcortical volume                | <b>0.69</b> | <b>2.00e-11</b> | <b>1.53e-10</b> | <b>0.67</b> | <b>7.56e-11</b> | <b>5.34e-10</b> | -0.34       | 0.731           | 0.815           |
| 4th ventricle subcortical volume                | <b>0.60</b> | <b>1.65e-08</b> | <b>8.77e-08</b> | <b>0.69</b> | <b>1.67e-11</b> | <b>1.30e-10</b> | 1.36        | 0.175           | 0.258           |
| brain stem subcortical volume                   | <b>0.78</b> | <b>2.74e-16</b> | <b>4.29e-15</b> | <b>0.82</b> | <b>6.80e-19</b> | <b>1.70e-17</b> | 1.12        | 0.261           | 0.361           |
| left hippocampus subcortical volume             | 0.17        | 0.073           | 0.121           | <b>0.40</b> | <b>2.66e-04</b> | <b>7.36e-04</b> | 1.82        | 0.068           | 0.115           |
| left amygdala subcortical volume                | <b>0.27</b> | <b>0.011</b>    | <b>0.023</b>    | 0.22        | 0.031           | 0.056           | -0.40       | 0.689           | 0.778           |
| csf subcortical volume                          | <b>0.24</b> | <b>0.020</b>    | <b>0.038</b>    | <b>0.24</b> | <b>0.023</b>    | <b>0.042</b>    | -0.12       | 0.907           | 0.948           |
| left accumbens area subcortical volume          | 7.6e-03     | 0.475           | 0.584           | -0.02       | 0.572           | 0.674           | -0.21       | 0.830           | 0.893           |
| left ventral diencephalon subcortical volume    | <b>0.48</b> | <b>1.26e-05</b> | <b>4.35e-05</b> | <b>0.66</b> | <b>1.86e-10</b> | <b>1.25e-09</b> | 2.21        | 0.027           | 0.050           |
| left vessel subcortical volume                  | 8.6e-03     | 0.472           | 0.581           | 3.7e-03     | 0.488           | 0.594           | -0.03       | 0.977           | 0.991           |
| left choroid plexus subcortical volume          | <b>0.39</b> | <b>3.28e-04</b> | <b>8.89e-04</b> | <b>0.41</b> | <b>1.83e-04</b> | <b>5.18e-04</b> | 0.21        | 0.833           | 0.895           |
| right lateral ventricle subcortical volume      | <b>0.92</b> | <b>1.53e-29</b> | <b>2.79e-27</b> | <b>0.93</b> | <b>9.24e-33</b> | <b>2.24e-30</b> | 1.57        | 0.116           | 0.182           |
| right inf lat vent subcortical volume           | <b>0.45</b> | <b>4.81e-05</b> | <b>1.50e-04</b> | <b>0.59</b> | <b>2.75e-08</b> | <b>1.42e-07</b> | 1.66        | 0.096           | 0.154           |
| cerebellum white matter subcortical volume      | <b>0.62</b> | <b>4.73e-09</b> | <b>2.67e-08</b> | <b>0.50</b> | <b>4.15e-06</b> | <b>1.57e-05</b> | -1.58       | 0.114           | 0.178           |
| cerebellum cortex subcortical volume            | <b>0.68</b> | <b>2.26e-11</b> | <b>1.67e-10</b> | <b>0.79</b> | <b>1.74e-16</b> | <b>2.85e-15</b> | <b>2.34</b> | <b>0.019</b>    | <b>0.037</b>    |
| right thalamus proper subcortical volume        | <b>0.29</b> | <b>0.006</b>    | <b>0.014</b>    | <b>0.42</b> | <b>1.31e-04</b> | <b>3.79e-04</b> | 1.28        | 0.202           | 0.290           |
| right caudate subcortical volume                | 0.19        | 0.052           | 0.089           | <b>0.38</b> | <b>6.35e-04</b> | <b>0.002</b>    | 1.63        | 0.103           | 0.164           |
| right putamen subcortical volume                | <b>0.29</b> | <b>0.007</b>    | <b>0.014</b>    | <b>0.50</b> | <b>5.55e-06</b> | <b>2.07e-05</b> | 1.69        | 0.091           | 0.147           |
| right pallidum subcortical volume               | <b>0.24</b> | <b>0.022</b>    | <b>0.041</b>    | 0.14        | 0.124           | 0.193           | -0.64       | 0.523           | 0.626           |
| right hippocampus subcortical volume            | 0.14        | 0.117           | 0.184           | <b>0.42</b> | <b>1.59e-04</b> | <b>4.55e-04</b> | 2.14        | 0.033           | 0.059           |
| right amygdala subcortical volume               | 0.19        | 0.052           | 0.089           | 0.21        | 0.038           | 0.067           | 0.12        | 0.902           | 0.944           |
| right accumbens area subcortical volume         | 0.17        | 0.079           | 0.131           | 0.11        | 0.176           | 0.258           | -0.39       | 0.699           | 0.785           |
| right ventral diencephalon subcortical volume   | <b>0.58</b> | <b>5.45e-08</b> | <b>2.70e-07</b> | <b>0.52</b> | <b>1.72e-06</b> | <b>6.94e-06</b> | -0.82       | 0.411           | 0.524           |
| right vessel subcortical volume                 | -7.9e-03    | 0.526           | 0.628           | <b>0.63</b> | <b>1.51e-09</b> | <b>9.11e-09</b> | <b>4.24</b> | <b>2.24e-05</b> | <b>7.50e-05</b> |
| right choroid plexus subcortical volume         | <b>0.41</b> | <b>1.61e-04</b> | <b>4.63e-04</b> | <b>0.50</b> | <b>5.25e-06</b> | <b>1.97e-05</b> | 0.91        | 0.364           | 0.474           |
| optic chiasm subcortical volume                 | 0.02        | 0.446           | 0.558           | 0.05        | 0.330           | 0.435           | 0.27        | 0.787           | 0.861           |

|                                                  |             |                 |                 |             |                 |                 |             |                 |                 |
|--------------------------------------------------|-------------|-----------------|-----------------|-------------|-----------------|-----------------|-------------|-----------------|-----------------|
| corpus callosum posterior subcortical volume     | <b>0.34</b> | <b>0.002</b>    | <b>0.004</b>    | <b>0.47</b> | <b>1.88e-05</b> | <b>6.37e-05</b> | 1.59        | 0.112           | 0.176           |
| corpus callosum mid posterior subcortical volume | 0.13        | 0.133           | 0.205           | 0.16        | 0.093           | 0.149           | 0.34        | 0.736           | 0.818           |
| corpus callosum central subcortical volume       | <b>0.29</b> | <b>0.007</b>    | <b>0.014</b>    | 0.19        | 0.058           | 0.099           | -1.20       | 0.230           | 0.325           |
| corpus callosum mid anterior subcortical volume  | <b>0.33</b> | <b>0.002</b>    | <b>0.005</b>    | 0.20        | 0.045           | 0.079           | -1.55       | 0.120           | 0.188           |
| corpus callosum anterior subcortical volume      | <b>0.43</b> | <b>9.05e-05</b> | <b>2.67e-04</b> | <b>0.74</b> | <b>4.82e-14</b> | <b>5.23e-13</b> | <b>4.22</b> | <b>2.41e-05</b> | <b>8.00e-05</b> |

**STable 6.** Correlations of global measurements from SynthSR-processed axial 64mT scans versus SynthSR-processed multi-orientation 64mT scans with 3T scans. Differences between correlation strengths were tested using Steiger's Z. A positive Z-value indicates that the multi-orientation scans were more strongly correlated to 3T scans than the axial-only scans. Analyses that are statistically significant after correction for multiple comparisons are in bold.

| Measurement                    | SynthSR-Processed Axial 64mT Correlations with 3T |                 |                 | SynthSR-Processed Multi-Orientation 64mT Correlations with 3T |                 |                 | Steiger      |              |              |
|--------------------------------|---------------------------------------------------|-----------------|-----------------|---------------------------------------------------------------|-----------------|-----------------|--------------|--------------|--------------|
|                                | <i>ICC</i>                                        | <i>p</i>        | <i>q</i>        | <i>ICC</i>                                                    | <i>p</i>        | <i>q</i>        | <i>z</i>     | <i>p</i>     | <i>q</i>     |
| Total Surface Area             | <b>0.90</b>                                       | <b>9.01e-26</b> | <b>5.16e-25</b> | <b>0.87</b>                                                   | <b>1.42e-22</b> | <b>6.38e-22</b> | <b>-2.16</b> | <b>0.031</b> | <b>0.042</b> |
| Mean Cortical Thickness        | 0.14                                              | 0.241           | 0.286           | 0.12                                                          | 0.317           | 0.363           | -0.19        | 0.853        | 0.867        |
| Estimated Intracranial Volume  | <b>0.85</b>                                       | <b>1.74e-20</b> | <b>6.10e-20</b> | <b>0.84</b>                                                   | <b>1.52e-19</b> | <b>5.05e-19</b> | -0.89        | 0.371        | 0.410        |
| Subcortical Gray Matter Volume | <b>0.88</b>                                       | <b>4.89e-24</b> | <b>2.57e-23</b> | <b>0.87</b>                                                   | <b>3.47e-22</b> | <b>1.46e-21</b> | -0.84        | 0.400        | 0.435        |
| Cortical Volume                | <b>0.86</b>                                       | <b>1.94e-21</b> | <b>7.17e-21</b> | <b>0.86</b>                                                   | <b>5.50e-22</b> | <b>2.17e-21</b> | 0.28         | 0.776        | 0.802        |
| Cerebral White Matter Volume   | <b>0.92</b>                                       | <b>1.23e-28</b> | <b>7.74e-28</b> | <b>0.92</b>                                                   | <b>1.20e-28</b> | <b>7.74e-28</b> | 5.4e-03      | 0.996        | 0.996        |
| Total Brain Volume             | <b>0.97</b>                                       | <b>1.15e-43</b> | <b>1.81e-42</b> | <b>0.96</b>                                                   | <b>3.64e-38</b> | <b>3.82e-37</b> | -1.94        | 0.052        | 0.069        |

**STable 7.** Correlations of individual-level differences between low- and high-field scans with motion during low-field scans (framewise displacement). Steiger's Z-tests assessed whether correlations were significantly different between low-field acquisition approaches. Analyses that are statistically significant after correction for multiple comparisons are in bold.

| Brain measure                  | Standard LF Axial-3T x Motion |          |          | SynthSR-3T x Motion |          |          | Steiger's Test: SynthSR-3T x Motion vs. Standard LF Axial-3T x Motion |              |              | Standard LF Multiple-3T x Motion |          |          | Steigers Test: Standard LF Multiple-3T x Motion vs. Standard LF Axial-3T x Motion |          |          | SynthSR Multiple-3T x Motion |          |          | Steiger's test: SynthSR multiple-3T x Motion vs. Standard LF Axial-3T x Motion |          |          |
|--------------------------------|-------------------------------|----------|----------|---------------------|----------|----------|-----------------------------------------------------------------------|--------------|--------------|----------------------------------|----------|----------|-----------------------------------------------------------------------------------|----------|----------|------------------------------|----------|----------|--------------------------------------------------------------------------------|----------|----------|
|                                | <i>r</i>                      | <i>p</i> | <i>q</i> | <i>r</i>            | <i>p</i> | <i>q</i> | <i>Z</i>                                                              | <i>p</i>     | <i>q</i>     | <i>r</i>                         | <i>p</i> | <i>q</i> | <i>Z</i>                                                                          | <i>p</i> | <i>q</i> | <i>r</i>                     | <i>p</i> | <i>q</i> | <i>Z</i>                                                                       | <i>p</i> | <i>q</i> |
| Total Surface Area             | 0.03                          | 0.804    | 0.975    | 0.05                | 0.697    | 0.899    | 0.12                                                                  | 0.906        | 0.979        | 1.7e-03                          | 0.989    | 0.989    | -0.28                                                                             | 0.778    | 0.975    | 0.05                         | 0.696    | 0.899    | 0.11                                                                           | 0.909    | 0.979    |
| Mean Cortical Thickness        | -0.12                         | 0.325    | 0.568    | -0.14               | 0.242    | 0.475    | -0.12                                                                 | 0.901        | 0.979        | -0.13                            | 0.297    | 0.560    | -0.06                                                                             | 0.953    | 0.989    | -3.1e-03                     | 0.980    | 0.989    | 0.64                                                                           | 0.520    | 0.750    |
| Estimated Intracranial Volume  | 0.19                          | 0.113    | 0.284    | -4.1e-03            | 0.973    | 0.989    | -1.05                                                                 | 0.293        | 0.560        | 0.20                             | 0.096    | 0.268    | 0.17                                                                              | 0.862    | 0.979    | 0.03                         | 0.824    | 0.975    | -0.80                                                                          | 0.423    | 0.691    |
| Subcortical Gray Matter Volume | 0.26                          | 0.029    | 0.125    | 0.28                | 0.020    | 0.087    | 0.14                                                                  | 0.887        | 0.979        | 0.20                             | 0.102    | 0.274    | -0.72                                                                             | 0.473    | 0.705    | 0.25                         | 0.036    | 0.140    | -0.07                                                                          | 0.947    | 0.989    |
| Cortical Volume                | 0.03                          | 0.775    | 0.975    | -0.18               | 0.127    | 0.296    | <b>-2.73</b>                                                          | <b>0.006</b> | <b>0.041</b> | -0.08                            | 0.486    | 0.710    | -1.61                                                                             | 0.107    | 0.277    | -0.12                        | 0.305    | 0.563    | -1.87                                                                          | 0.061    | 0.213    |
| Cerebral White Matter Volume   | 0.02                          | 0.860    | 0.979    | -0.08               | 0.532    | 0.755    | -0.84                                                                 | 0.400        | 0.665        | -0.11                            | 0.351    | 0.603    | -2.12                                                                             | 0.034    | 0.140    | 0.02                         | 0.891    | 0.979    | -0.03                                                                          | 0.972    | 0.989    |
| Total Brain Volume             | 0.20                          | 0.103    | 0.274    | -0.07               | 0.564    | 0.767    | -1.83                                                                 | 0.067        | 0.219        | 0.09                             | 0.435    | 0.699    | -1.27                                                                             | 0.206    | 0.428    | -0.09                        | 0.475    | 0.705    | -1.84                                                                          | 0.065    | 0.219    |

**Stable 8.** Correlations of individual-level differences between low- and high-field scans with participant age. Steiger's Z-tests assessed whether correlations were significantly different between low-field acquisition approaches.

| Brain measure                  | Standard LF Axial-3T x Age |                 |                 | SynthSR-3T x Age |                 |                 | Steiger's Test: SynthSR-3T x Age vs. Standard LF Axial-3T x Age |              |              | Standard LF Multiple-3T x Age |                 |                 | Steigers Test: Standard LF Multiple-3T x Age vs. Standard LF Axial-3T x Age |                 |              | SynthSR Multiple-3T x Age |                 |                 | Steiger's test: SynthSR multiple-3T x Age vs. Standard LF Axial-3T x Age |          |          |
|--------------------------------|----------------------------|-----------------|-----------------|------------------|-----------------|-----------------|-----------------------------------------------------------------|--------------|--------------|-------------------------------|-----------------|-----------------|-----------------------------------------------------------------------------|-----------------|--------------|---------------------------|-----------------|-----------------|--------------------------------------------------------------------------|----------|----------|
|                                | <i>r</i>                   | <i>p</i>        | <i>q</i>        | <i>r</i>         | <i>p</i>        | <i>q</i>        | <i>Z</i>                                                        | <i>p</i>     | <i>q</i>     | <i>r</i>                      | <i>p</i>        | <i>q</i>        | <i>Z</i>                                                                    | <i>p</i>        | <i>q</i>     | <i>r</i>                  | <i>p</i>        | <i>q</i>        | <i>Z</i>                                                                 | <i>p</i> | <i>q</i> |
| Total Surface Area             | <b>-0.43</b>               | <b>1.74e-04</b> | <b>0.002</b>    | -0.09            | 0.473           | 0.705           | 2.56                                                            | 0.011        | 0.061        | -0.29                         | 0.015           | 0.080           | 1.55                                                                        | 0.121           | 0.290        | -0.09                     | 0.470           | 0.705           | 2.42                                                                     | 0.016    | 0.080    |
| Mean Cortical Thickness        | -0.09                      | 0.465           | 0.705           | <b>-0.59</b>     | <b>8.36e-08</b> | <b>2.73e-06</b> | <b>-3.17</b>                                                    | <b>0.002</b> | <b>0.014</b> | <b>-0.40</b>                  | <b>5.06e-04</b> | <b>0.006</b>    | <b>-2.77</b>                                                                | <b>0.006</b>    | <b>0.040</b> | <b>-0.38</b>              | <b>0.001</b>    | <b>0.013</b>    | -1.67                                                                    | 0.095    | 0.268    |
| Estimated Intracranial Volume  | -0.12                      | 0.316           | 0.566           | 0.19             | 0.116           | 0.284           | 1.67                                                            | 0.094        | 0.268        | -0.05                         | 0.678           | 0.898           | 1.26                                                                        | 0.209           | 0.428        | 0.28                      | 0.017           | 0.082           | 2.00                                                                     | 0.045    | 0.171    |
| Subcortical Gray Matter Volume | 0.07                       | 0.543           | 0.759           | -4.2e-03         | 0.972           | 0.989           | -0.60                                                           | 0.550        | 0.759        | -0.05                         | 0.666           | 0.895           | -1.38                                                                       | 0.167           | 0.365        | -0.11                     | 0.382           | 0.645           | -1.26                                                                    | 0.207    | 0.428    |
| Cortical Volume                | <b>-0.64</b>               | <b>2.18e-09</b> | <b>2.14e-07</b> | <b>-0.58</b>     | <b>1.44e-07</b> | <b>3.53e-06</b> | 1.00                                                            | 0.318        | 0.566        | <b>-0.63</b>                  | <b>6.57e-09</b> | <b>3.22e-07</b> | 0.27                                                                        | 0.788           | 0.975        | <b>-0.53</b>              | <b>2.34e-06</b> | <b>4.59e-05</b> | 1.67                                                                     | 0.095    | 0.268    |
| Cerebral White Matter Volume   | -0.31                      | 0.010           | 0.061           | -0.28            | 0.019           | 0.087           | 0.23                                                            | 0.818        | 0.975        | <b>-0.39</b>                  | <b>8.45e-04</b> | <b>0.009</b>    | -1.41                                                                       | 0.158           | 0.352        | <b>-0.33</b>              | <b>0.005</b>    | <b>0.039</b>    | -0.21                                                                    | 0.831    | 0.975    |
| Total Brain Volume             | -0.03                      | 0.835           | 0.975           | -0.24            | 0.047           | 0.171           | -1.47                                                           | 0.141        | 0.321        | <b>-0.33</b>                  | <b>0.006</b>    | <b>0.040</b>    | <b>-3.81</b>                                                                | <b>1.36e-04</b> | <b>0.002</b> | -0.21                     | 0.085           | 0.268           | -1.19                                                                    | 0.234    | 0.468    |

Supplemental Figures

SFigure 1. Flow chart of participant inclusion and exclusion

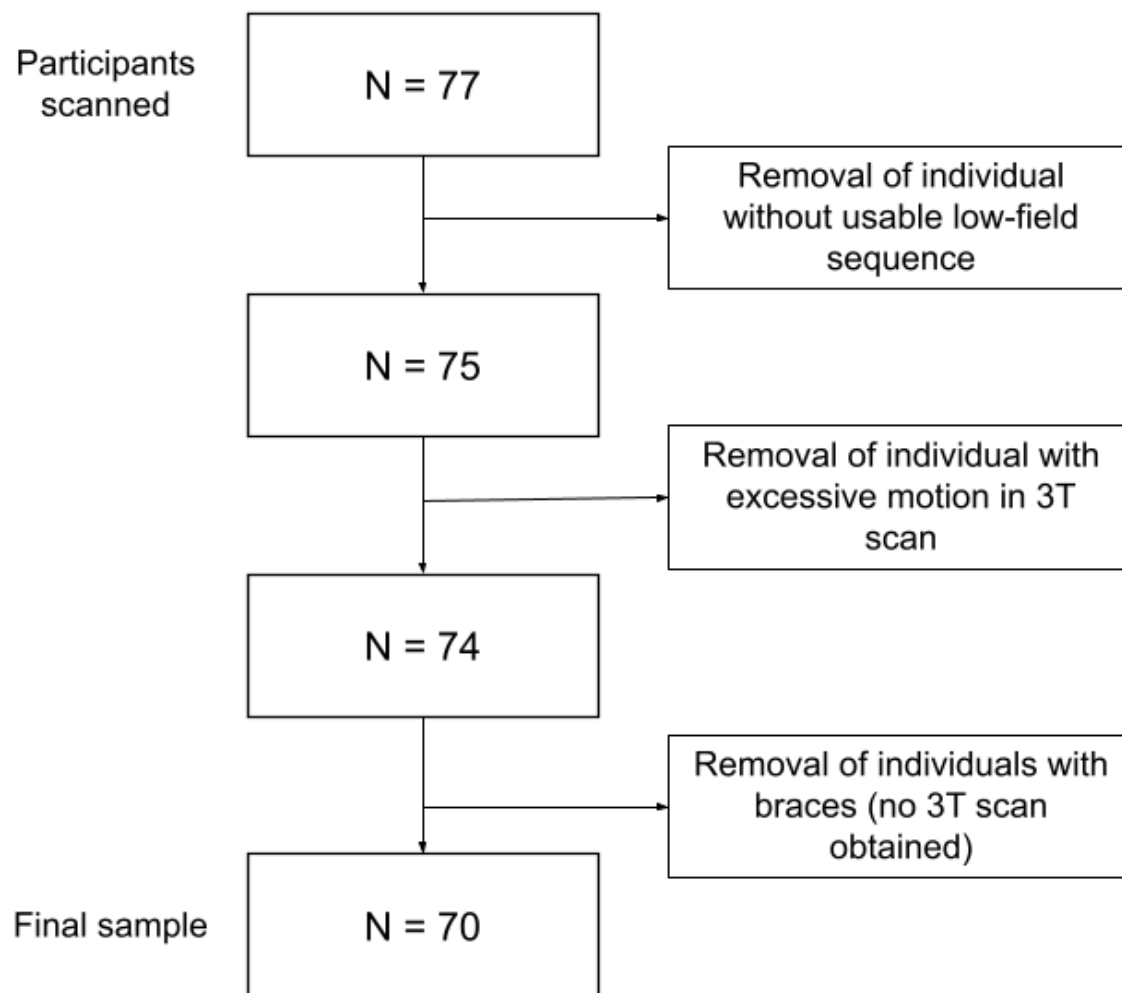

**Figure 2.** Bland-Altman plots of agreement between 3T and standard 64mT scans. Bland-Altman plots illustrate the agreement between 3T and standard 64mT scans. Bias indicated by blue dotted line, and 95% limits of agreement by the upper and lower red dotted lines. 95% confidence intervals indicated in shaded regions. Correlation between pairwise differences and means shown by line of best fit.

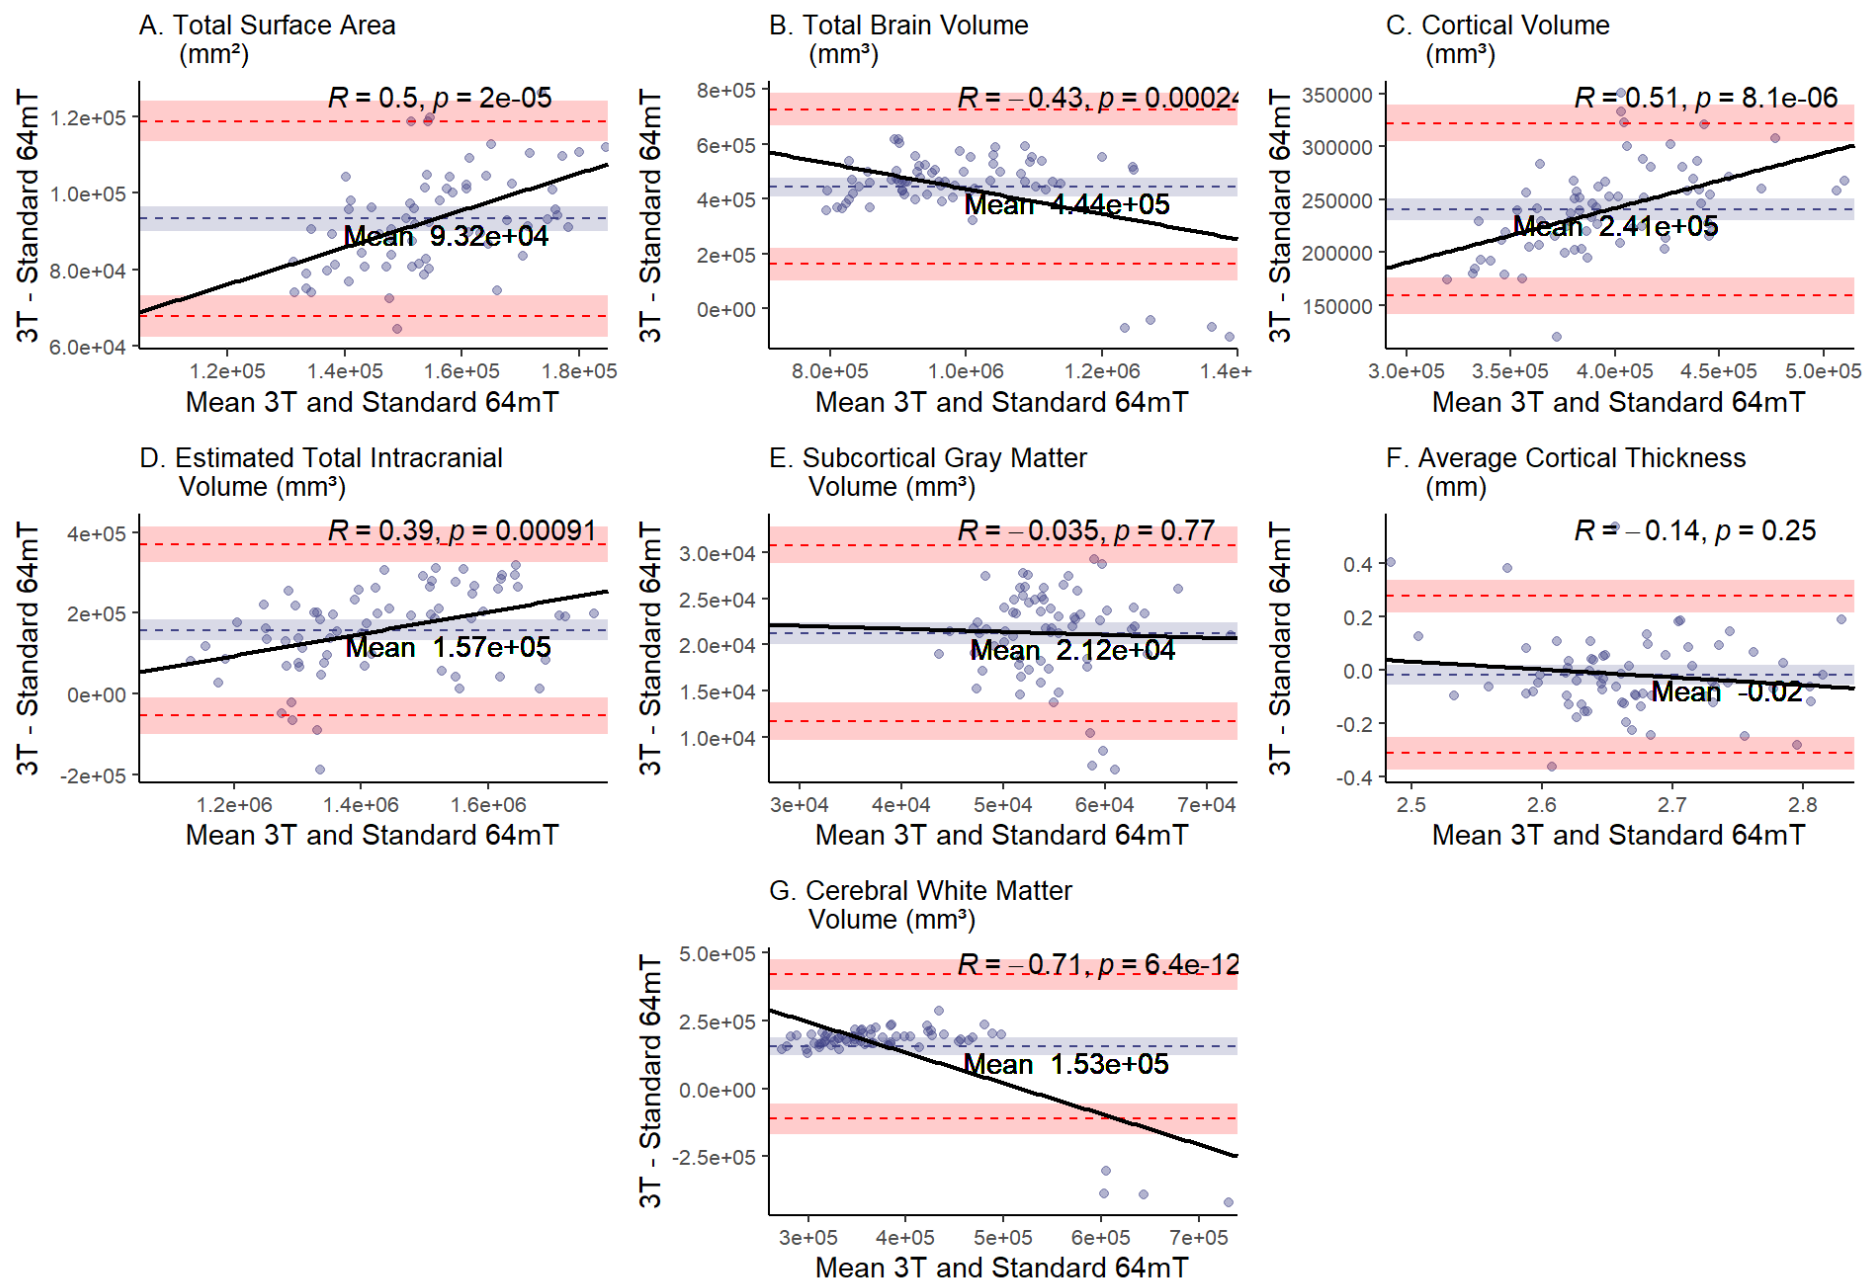

**Figure 3.** Bland-Altman plots illustrate the agreement between 3T and SynthSR-processed 64mT scans. Bias indicated by blue dotted line, and 95% limits of agreement by the upper and lower red dotted lines. 95% confidence intervals indicated in shaded regions. Correlation between pairwise differences and means shown by line of best fit.

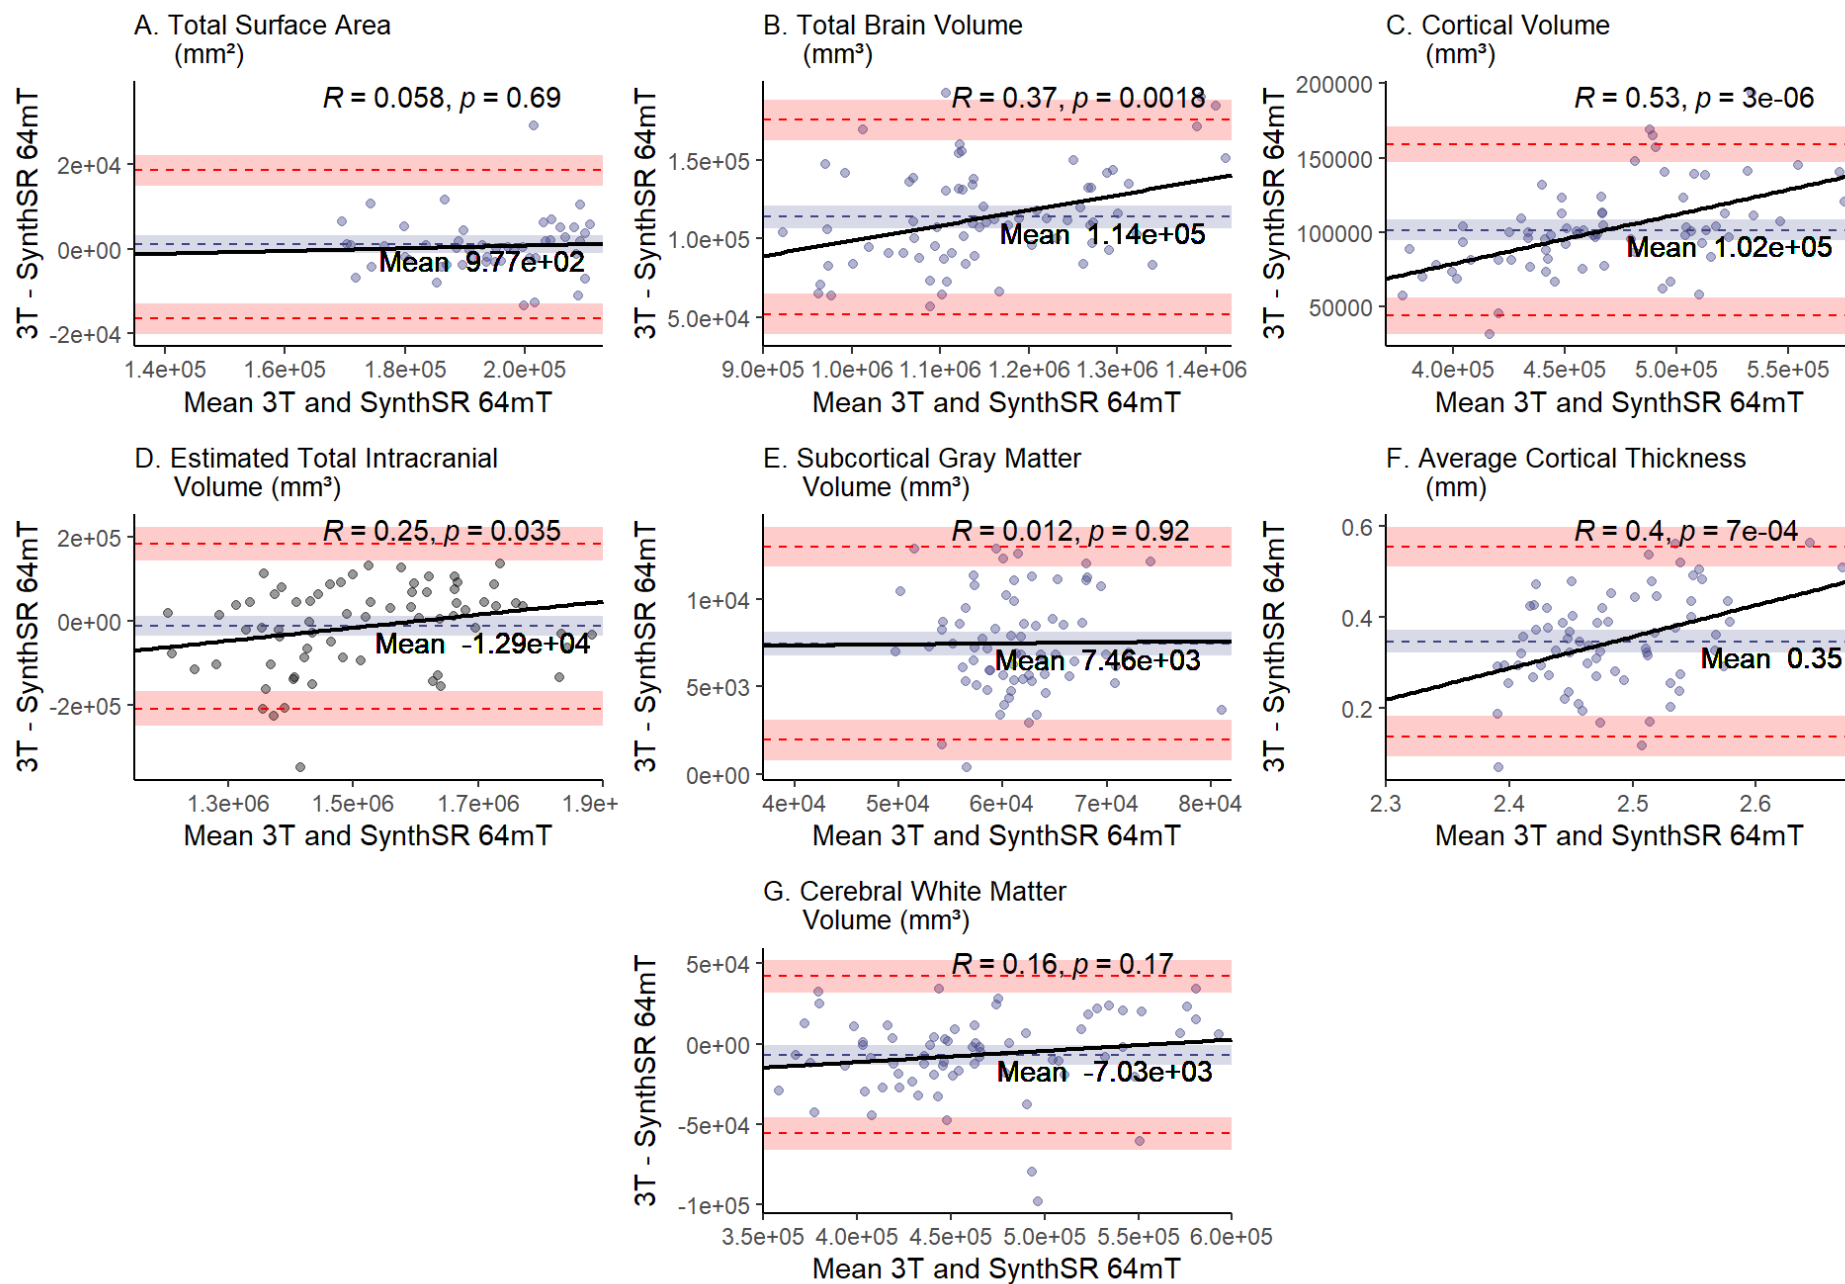



**SFigure 4.** Comparison of individual-level global measurements across standard 64mT axial scans, standard 64mT multi-orientation scans, and traditional 3T scans

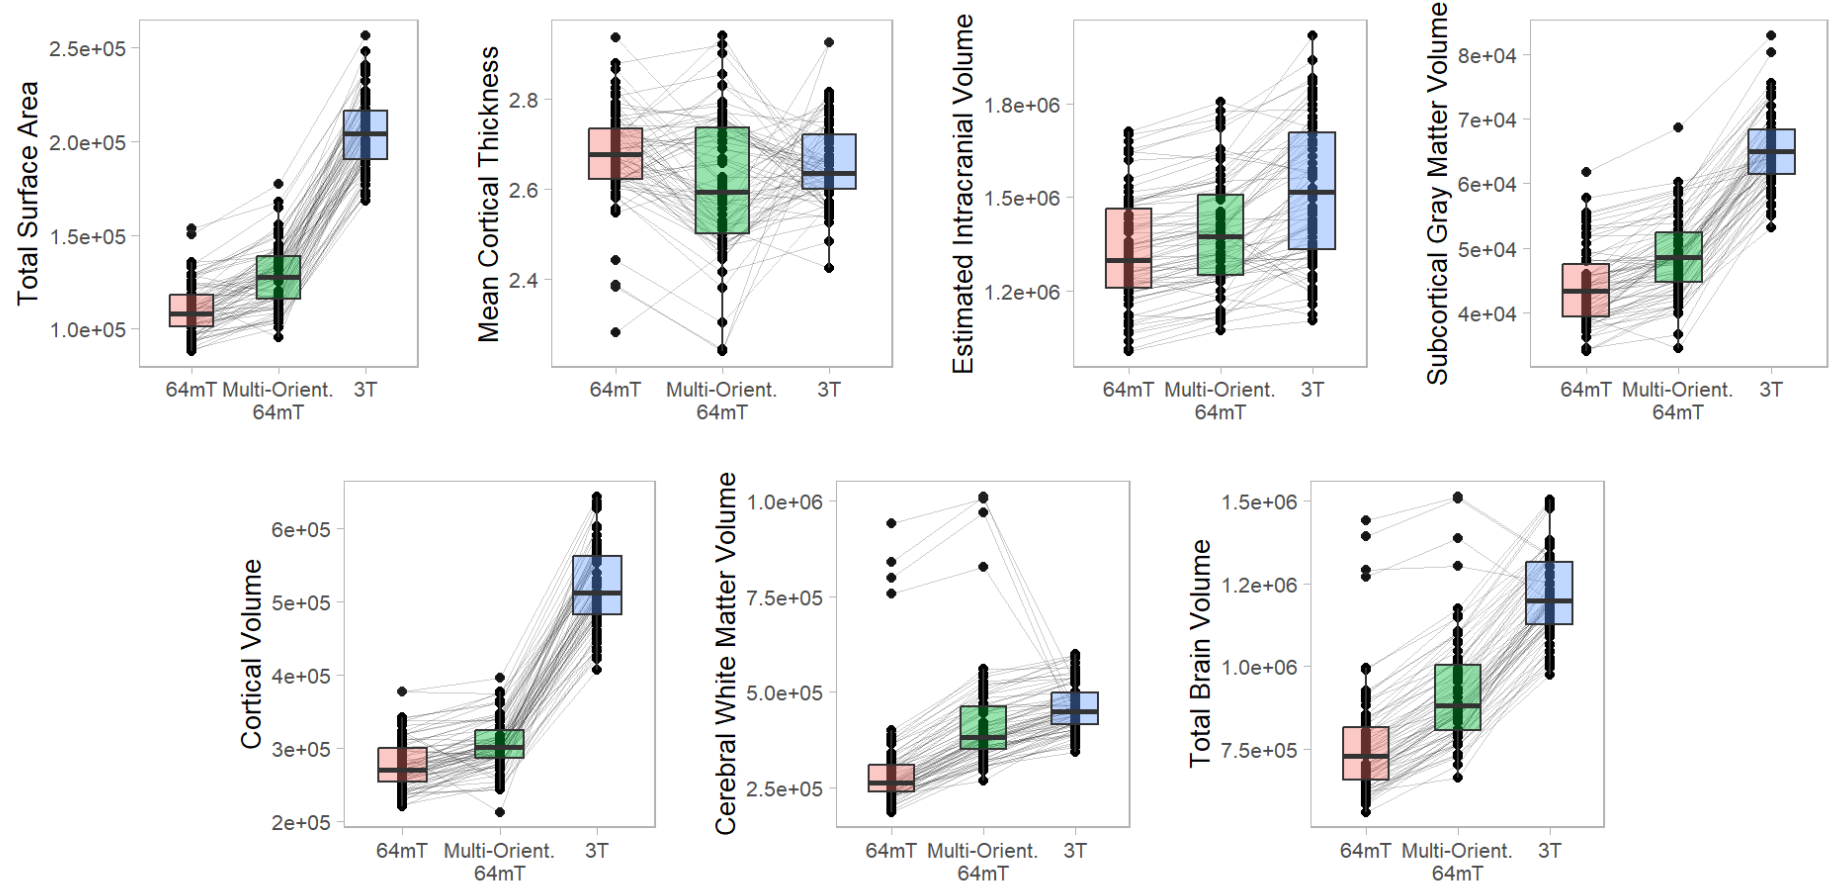

**Figure 5.** Comparison of individual-level global measurements across standard 64mT axial scans, SynthSR-processed 64mT multi-orientation scans, and traditional 3T scans

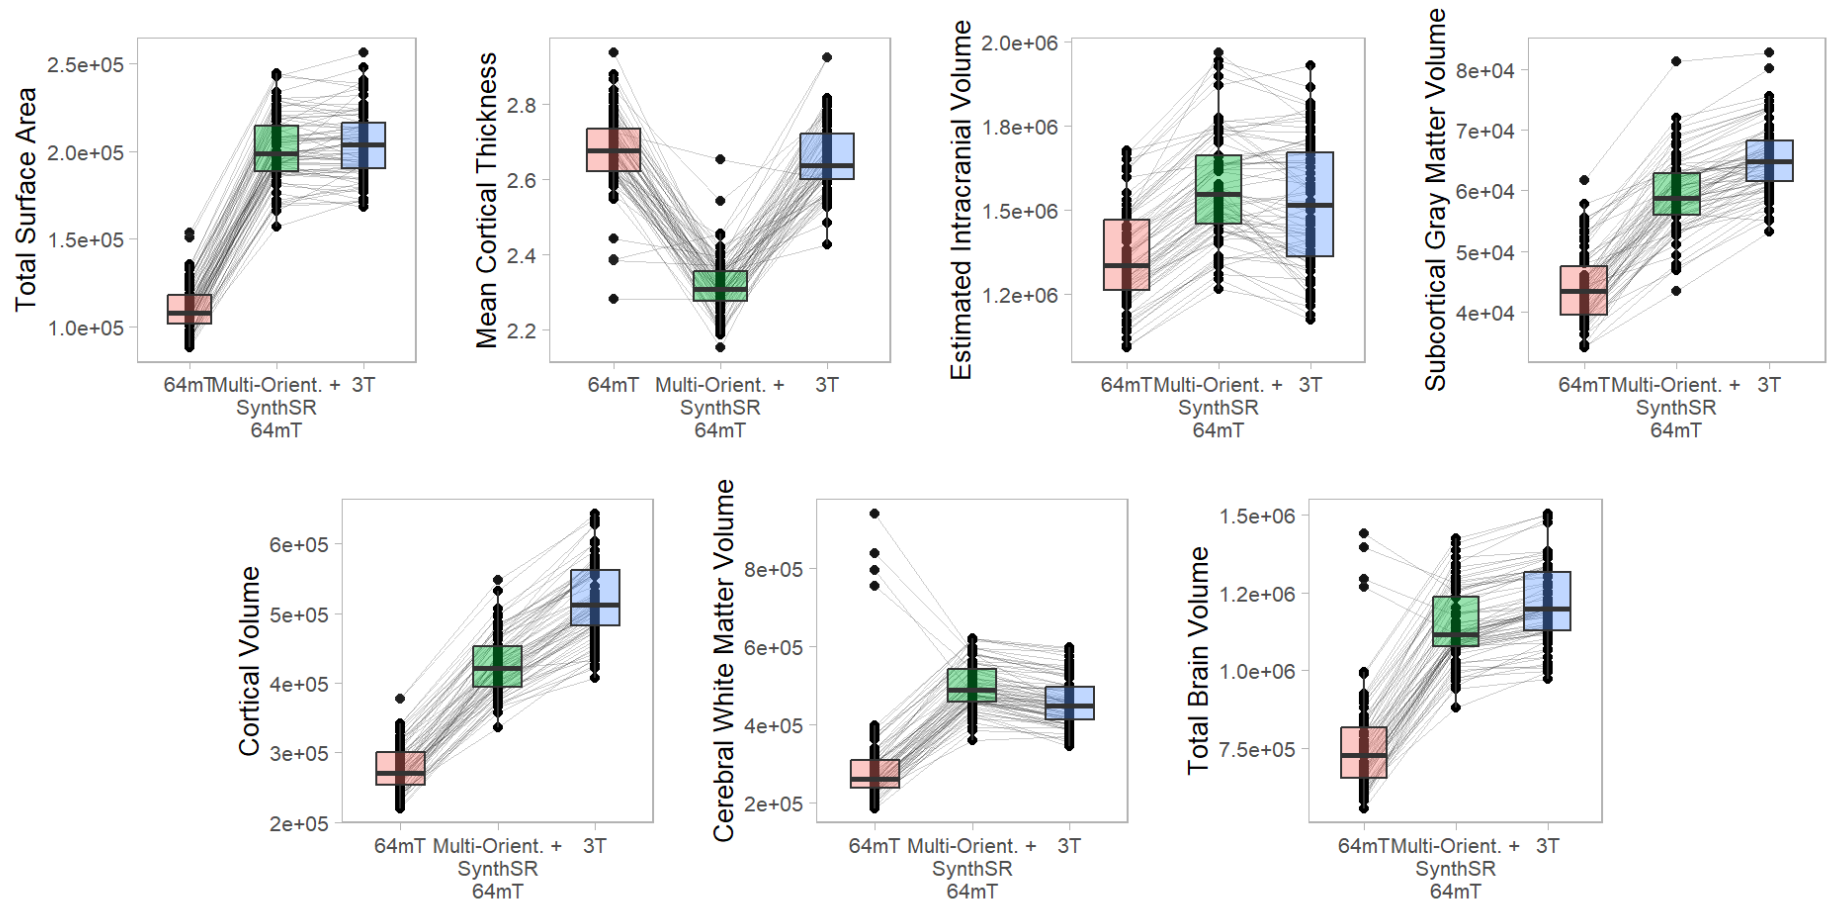

**SFigure 6.** Comparison of super-resolution approaches in improving correspondence between low-field and high-field-acquired MR images. A. Correlation of standard, single-orientation low-field images with high-field images for surface area, cortical volume, cortical thickness and subcortical volume. B. Correlation of SynthSR-processed, multi-orientation low-field images with high-field images. C. Steiger z-test values for change in correspondence between single-orientation, SynthSR-processed images and multi-orientation, SynthSR-processed images.

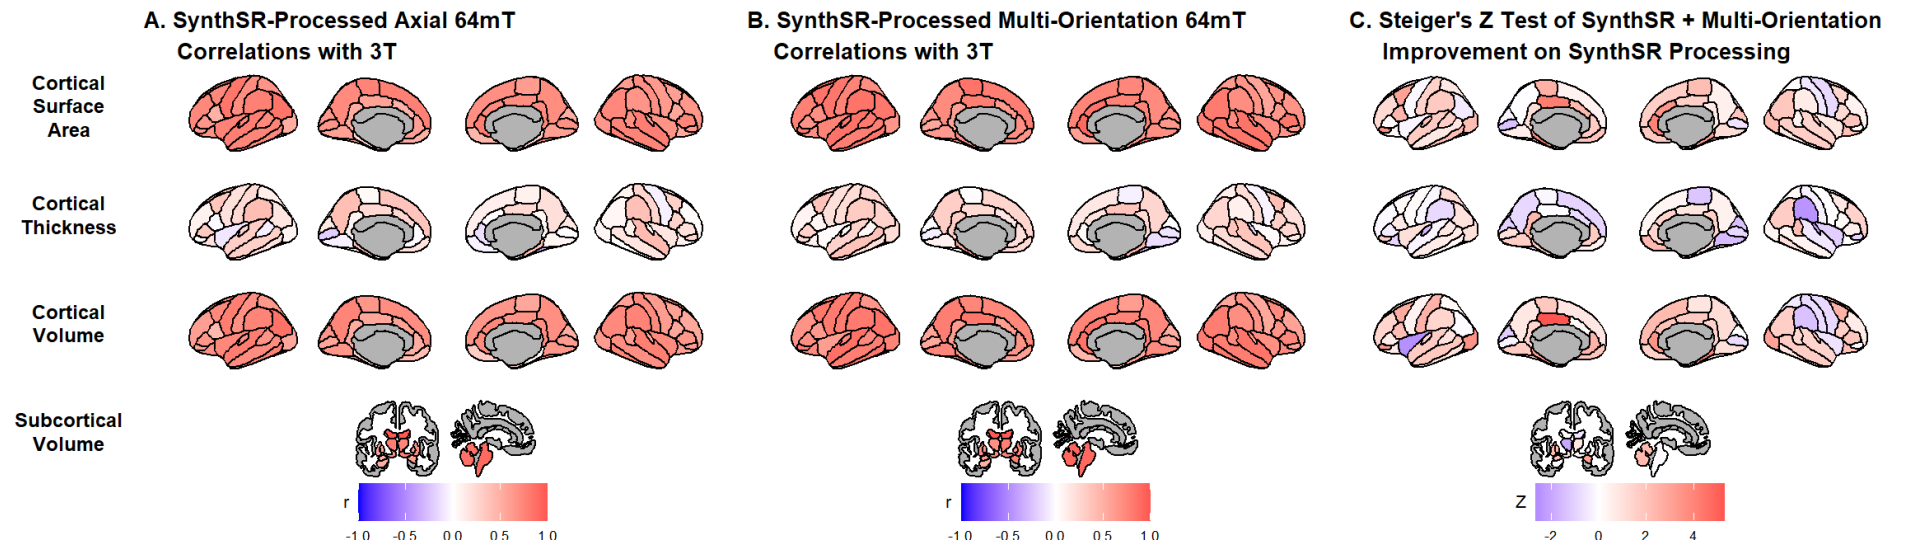

Supplement: Supplementary file [file media-1.pdf]
